# Supplementary material for: Restricted and non-essential redundancy of RNAi and piRNA pathways in mouse oocytes
Source: PLoS Genet. 2019 Dec 20;15(12):e1008261. doi: 10.1371/journal.pgen.1008261 (PMC6944382; doi:10.1371/journal.pgen.1008261)
Supplement: S5 Table — (CSV) [file pgen.1008261.s013.csv]

repClass	repFamily	repName	L1base_id	strand	chrName	chrStart	chrEnd	coverage_ratio.DBL	longest_stretch.DBL	FPKM.DBL	FPKM.WT
LINE	L1	L1_Mus1	UID-539	+	chr18	50253325	50260992	0.737	2428	46.606	7.215
LINE	L1	L1_Mus1	UID-633	+	chr3	42116105	42124003	0.777	2167	43.355	7.299
LINE	L1	L1_Mus2	UID-553	+	chr18	78696384	78704283	0.828	1687	40.968	7.252
LINE	L1	L1_Mus2	UID-997	+	chr19	31722763	31730987	0.764	1333	39.5	6.92
LINE	L1	L1_Mus2	UID-1881	+	chr14	13640252	13648601	0.788	1657	15.468	3.078
LINE	L1	L1Md_A	UID-2696	-	chr10	27812528	27825766	0.932	2942	63.957	11.212
LINE	L1	L1Md_A	UID-1692	-	chr2	80805871	80817439	0.872	2356	54.36	9.146
LINE	L1	L1Md_A	UID-79	+	chr1	121202598	121210834	0.91	3082	54.343	8.483
LINE	L1	L1Md_A	UID-2333	-	chr9	87832724	87840447	0.892	2717	52.86	8.095
LINE	L1	L1Md_A	UID-2735	+	chr10	35676480	35684291	0.908	2593	52.762	8.165
LINE	L1	L1Md_A	UID-584	-	chr18	50531952	50539143	0.902	2206	52.668	7.862
LINE	L1	L1Md_A	UID-506	-	chr16	11482854	11489638	0.912	3096	52.484	7.962
LINE	L1	L1Md_A	UID-2088	-	chr17	12010285	12019338	0.935	2656	52.48	8.691
LINE	L1	L1Md_A	UID-2321	-	chr9	109245043	109252065	0.902	2134	52.381	7.758
LINE	L1	L1Md_A	UID-115	+	chr1	176282103	176288887	0.916	2978	52.255	8.104
LINE	L1	L1Md_A	UID-929	+	chr11	47427867	47434887	0.907	2156	52.071	7.873
LINE	L1	L1Md_A	UID-953	-	chr11	62968344	62974703	0.913	2897	52.041	7.836
LINE	L1	L1Md_A	UID-1352	+	chrX	95870450	95877025	0.904	1401	51.893	7.958
LINE	L1	L1Md_A	UID-376	-	chr5	24761070	24767831	0.892	2325	51.804	7.895
LINE	L1	L1Md_A	UID-453	+	chr16	95508946	95516960	0.898	1315	51.771	7.826
LINE	L1	L1Md_A	UID-1972	-	chr14	77070652	77077644	0.904	1902	51.725	7.983
LINE	L1	L1Md_A	UID-303	-	chr5	141327878	141334693	0.899	2873	51.458	7.762
LINE	L1	L1Md_A	UID-1505	-	chr4	94791583	94798180	0.888	2239	51.398	7.689
LINE	L1	L1Md_A	UID-901	+	chr15	89659643	89666216	0.89	1636	51.372	7.411
LINE	L1	L1Md_A	UID-2517	+	chr12	15191477	15198666	0.904	1704	50.9	7.757
LINE	L1	L1Md_A	UID-1058	-	chr13	25536608	25543216	0.884	2407	50.865	7.846
LINE	L1	L1Md_A	UID-27	+	chr1	42137428	42143796	0.892	2578	50.805	7.655
LINE	L1	L1Md_A	UID-459	-	chr16	85713540	85720097	0.9	1289	50.694	7.551
LINE	L1	L1Md_A	UID-736	-	chr3	109612820	109619588	0.915	1752	50.591	7.54
LINE	L1	L1Md_A	UID-698	+	chr3	130508782	130515159	0.883	1848	50.514	7.325
LINE	L1	L1Md_A	UID-1013	-	chr19	22644292	22651681	0.906	1376	50.51	7.574
LINE	L1	L1Md_A	UID-1652	-	chr2	137345825	137353024	0.889	2591	50.44	7.619
LINE	L1	L1Md_A	UID-1025	-	chr13	106372708	106380116	0.887	1686	50.418	7.586
LINE	L1	L1Md_A	UID-1029	-	chr13	96357593	96364371	0.908	1879	50.396	7.729
LINE	L1	L1Md_A	UID-2322	-	chr9	107127981	107134563	0.9	3078	50.359	7.608
LINE	L1	L1Md_A	UID-2350	-	chr9	36652590	36660004	0.893	1871	50.347	7.71
LINE	L1	L1Md_A	UID-1181	-	chrX	100170845	100177823	0.899	1953	50.329	7.446
LINE	L1	L1Md_A	UID-716	-	chr3	151951039	151958228	0.907	1502	50.26	7.109
LINE	L1	L1Md_A	UID-886	+	chr15	51048266	51055048	0.897	1963	50.167	7.618
LINE	L1	L1Md_A	UID-1666	-	chr2	109097795	109104160	0.899	2100	50.157	7.424
LINE	L1	L1Md_A	UID-1417	+	chr4	12212352	12219331	0.894	1864	50.135	7.571
LINE	L1	L1Md_A	UID-1252	-	chrX	22500320	22507312	0.906	1304	50.082	7.09
LINE	L1	L1Md_A	UID-142	-	chr1	144458237	144464379	0.887	2686	50.038	6.97
LINE	L1	L1Md_A	UID-2550	+	chr12	63351186	63358578	0.893	1977	49.999	7.743
LINE	L1	L1Md_A	UID-2748	+	chr10	63663213	63669739	0.905	2006	49.942	6.723
LINE	L1	L1Md_A	UID-1545	-	chr4	50855523	50862682	0.891	1321	49.892	7.621
LINE	L1	L1Md_A	UID-2489	-	chr7	47505879	47512818	0.898	1976	49.874	7.903
LINE	L1	L1Md_A	UID-741	-	chr3	92546894	92554289	0.882	2612	49.871	7.394
LINE	L1	L1Md_A	UID-166	-	chr1	106293764	106300742	0.93	1478	49.809	7.309
LINE	L1	L1Md_A	UID-2068	-	chr17	69519081	69525657	0.891	1643	49.71	7.068
LINE	L1	L1Md_A	UID-2166	-	chr6	23474328	23481320	0.909	1170	49.706	7.72
LINE	L1	L1Md_A	UID-1776	+	chr8	60318942	60325905	0.894	2128	49.701	7.612
LINE	L1	L1Md_A	UID-1638	+	chr2	159637936	159644928	0.885	1528	49.701	7.608
LINE	L1	L1Md_A	UID-709	+	chr3	151960008	151967119	0.895	1502	49.629	7.067
LINE	L1	L1Md_A	UID-1775	+	chr8	60281372	60288370	0.904	1245	49.626	7.856
LINE	L1	L1Md_A	UID-2063	-	chr17	79641446	79648028	0.911	1567	49.61	7.361
LINE	L1	L1Md_A	UID-2081	-	chr17	43181311	43187882	0.9	1848	49.545	7.238
LINE	L1	L1Md_A	UID-779	-	chr3	41336860	41343436	0.888	1800	49.544	7
LINE	L1	L1Md_A	UID-764	-	chr3	59512184	59519166	0.907	2336	49.543	7.609
LINE	L1	L1Md_A	UID-2338	-	chr9	78882893	78890294	0.902	2263	49.535	7.997
LINE	L1	L1Md_A	UID-2135	-	chr6	65255004	65261580	0.867	2317	49.516	6.914
LINE	L1	L1Md_A	UID-2313	+	chr9	111805321	111811879	0.89	2523	49.487	6.974
LINE	L1	L1Md_A	UID-1735	-	chr2	9508223	9514985	0.889	2118	49.485	7.829
LINE	L1	L1Md_A	UID-1141	-	chrX	150614409	150620750	0.865	2892	49.473	7.304
LINE	L1	L1Md_A	UID-42	+	chr1	60320113	60327101	0.851	2888	49.395	7.488
LINE	L1	L1Md_A	UID-815	-	chr15	75332904	75339670	0.896	2618	49.368	7.42
LINE	L1	L1Md_A	UID-313	-	chr5	102440837	102446996	0.86	2700	49.356	7.239
LINE	L1	L1Md_A	UID-1688	-	chr2	82424809	82431380	0.899	2037	49.349	7.415
LINE	L1	L1Md_A	UID-259	+	chr5	61914002	61920573	0.907	2272	49.347	7.567
LINE	L1	L1Md_A	UID-2036	+	chr17	54112386	54119592	0.837	1713	49.336	6.97
LINE	L1	L1Md_A	UID-150	-	chr1	128846777	128853327	0.903	1414	49.326	7.263
LINE	L1	L1Md_A	UID-2003	-	chr14	28614412	28621209	0.905	1795	49.319	7.353
LINE	L1	L1Md_A	UID-2440	+	chr7	134100443	134107227	0.874	1291	49.318	7.046
LINE	L1	L1Md_A	UID-1600	+	chr2	64144719	64151272	0.887	2156	49.278	7.6
LINE	L1	L1Md_A	UID-1056	-	chr13	28469335	28476120	0.901	2086	49.258	7.447
LINE	L1	L1Md_A	UID-1309	+	chrX	57543474	57550037	0.877	2385	49.241	7.498
LINE	L1	L1Md_A	UID-1795	+	chr8	93341647	93348223	0.911	2973	49.214	7.564
LINE	L1	L1Md_A	UID-2499	-	chr7	17844580	17850922	0.864	1984	49.201	7.208
LINE	L1	L1Md_A	UID-2272	+	chr9	5780971	5787534	0.881	2005	49.194	7.343
LINE	L1	L1Md_A	UID-1283	+	chrX	35860114	35867407	0.875	1763	49.134	7.363
LINE	L1	L1Md_A	UID-984	+	chr19	7913191	7920157	0.917	1993	49.13	7.388
LINE	L1	L1Md_A	UID-1772	+	chr8	58095277	58102691	0.904	1337	49.099	7.158
LINE	L1	L1Md_A	UID-1259	-	chrX	15586971	15593648	0.899	1236	49.09	7.362
LINE	L1	L1Md_A	UID-840	-	chr15	42931945	42938521	0.86	2579	49.085	7.008
LINE	L1	L1Md_A	UID-621	+	chr3	16578316	16585099	0.837	995	49.079	6.747
LINE	L1	L1Md_A	UID-796	-	chr3	18549460	18557079	0.893	1667	49.073	7.453
LINE	L1	L1Md_A	UID-2603	-	chr12	67828867	67836682	0.894	1390	49.07	7.743
LINE	L1	L1Md_A	UID-317	-	chr5	96286591	96293791	0.873	1223	49.016	7.481
LINE	L1	L1Md_A	UID-563	-	chr18	90075752	90082513	0.883	1583	49.009	7.558
LINE	L1	L1Md_A	UID-2544	+	chr12	58119797	58127211	0.867	2721	48.97	7.379
LINE	L1	L1Md_A	UID-2207	+	chr6	35433474	35439842	0.871	1780	48.966	7.003
LINE	L1	L1Md_A	UID-548	+	chr18	71032497	71038858	0.89	2134	48.943	7.172
LINE	L1	L1Md_A	UID-1351	+	chrX	95743757	95750566	0.896	1873	48.924	7.126
LINE	L1	L1Md_A	UID-227	+	chr5	8652989	8659366	0.888	2650	48.89	7.317
LINE	L1	L1Md_A	UID-965	-	chr11	40838767	40845557	0.871	3299	48.877	7.761
LINE	L1	L1Md_A	UID-2509	+	chr12	6013017	6019570	0.906	1805	48.873	7.36
LINE	L1	L1Md_A	UID-648	+	chr3	58852160	58858947	0.896	1487	48.864	7.292
LINE	L1	L1Md_A	UID-425	+	chr16	64806253	64813037	0.872	2422	48.861	7.301
LINE	L1	L1Md_A	UID-11	+	chr1	20486393	20493621	0.875	2847	48.818	7.513
LINE	L1	L1Md_A	UID-1551	-	chr4	25834830	25841207	0.918	1887	48.81	7.454
LINE	L1	L1Md_A	UID-127	-	chr1	176893323	176899898	0.873	1214	48.789	7.472
LINE	L1	L1Md_A	UID-948	-	chr11	91636911	91643884	0.87	1079	48.776	7.392
LINE	L1	L1Md_A	UID-181	-	chr1	80687749	80694314	0.921	3147	48.769	6.724
LINE	L1	L1Md_A	UID-968	-	chr11	38902651	38909645	0.846	2140	48.756	7.209
LINE	L1	L1Md_A	UID-502	-	chr16	26256530	26262898	0.894	1448	48.73	6.897
LINE	L1	L1Md_A	UID-119	-	chr1	195049714	195056690	0.903	3307	48.726	7.381
LINE	L1	L1Md_A	UID-1843	-	chr8	57390891	57397217	0.887	1914	48.723	7.11
LINE	L1	L1Md_A	UID-1662	-	chr2	113128131	113134707	0.906	2514	48.711	7.198
LINE	L1	L1Md_A	UID-2702	-	chr10	15619557	15626950	0.915	1850	48.699	7.345
LINE	L1	L1Md_A	UID-1883	+	chr14	14428235	14434819	0.879	1881	48.696	7.359
LINE	L1	L1Md_A	UID-1841	-	chr8	57979792	57986168	0.911	2319	48.668	7.451
LINE	L1	L1Md_A	UID-2435	+	chr7	115077325	115083907	0.905	2479	48.649	7.104
LINE	L1	L1Md_A	UID-4	+	chr1	9175399	9181975	0.892	1031	48.593	7.03
LINE	L1	L1Md_A	UID-863	+	chr15	6892619	6899182	0.864	2403	48.585	7.298
LINE	L1	L1Md_A	UID-2024	+	chr17	22702975	22709960	0.892	1199	48.584	6.756
LINE	L1	L1Md_A	UID-809	-	chr15	94372998	94379525	0.892	1870	48.577	7.123
LINE	L1	L1Md_A	UID-1611	+	chr2	86842531	86849522	0.858	1320	48.484	7.257
LINE	L1	L1Md_A	UID-960	-	chr11	51018230	51024590	0.89	2480	48.478	7.217
LINE	L1	L1Md_A	UID-1559	-	chr4	19663750	19670326	0.882	2965	48.455	7.067
LINE	L1	L1Md_A	UID-1344	+	chrX	84607606	84613953	0.834	1534	48.429	7.198
LINE	L1	L1Md_A	UID-1238	-	chrX	44197656	44204647	0.888	1263	48.422	7.425
LINE	L1	L1Md_A	UID-693	+	chr3	121047353	121054557	0.879	1330	48.422	7.436
LINE	L1	L1Md_A	UID-318	-	chr5	96013767	96021384	0.905	2712	48.376	7.376
LINE	L1	L1Md_A	UID-2393	+	chr7	56951546	56958076	0.861	2423	48.345	7.37
LINE	L1	L1Md_A	UID-97	+	chr1	147282387	147288761	0.865	2198	48.336	7.067
LINE	L1	L1Md_A	UID-760	-	chr3	64239252	64246270	0.89	2055	48.334	7.277
LINE	L1	L1Md_A	UID-2448	-	chr7	113424106	113430889	0.883	2176	48.326	7.194
LINE	L1	L1Md_A	UID-2555	+	chr12	66164884	66171243	0.901	2164	48.297	6.804
LINE	L1	L1Md_A	UID-1101	+	chr13	76203807	76210181	0.874	2508	48.283	7.07
LINE	L1	L1Md_A	UID-295	+	chr5	131050295	131056860	0.882	1626	48.28	7.186
LINE	L1	L1Md_A	UID-572	-	chr18	84603844	84610426	0.884	1305	48.25	7.3
LINE	L1	L1Md_A	UID-1228	-	chrX	58383648	58390018	0.929	2188	48.248	6.849
LINE	L1	L1Md_A	UID-2672	-	chr10	63774002	63780417	0.851	1437	48.242	6.756
LINE	L1	L1Md_A	UID-461	-	chr16	84380552	84387116	0.92	1655	48.205	6.676
LINE	L1	L1Md_A	UID-2198	+	chr6	22644765	22651938	0.876	2638	48.188	7.712
LINE	L1	L1Md_A	UID-2285	+	chr9	33955736	33961898	0.895	1936	48.183	6.905
LINE	L1	L1Md_A	UID-701	+	chr3	134545764	134552154	0.882	1601	48.179	6.654
LINE	L1	L1Md_A	UID-537	+	chr18	49391275	49397832	0.852	2573	48.171	7.181
LINE	L1	L1Md_A	UID-1277	+	chrX	23974308	23981276	0.915	1095	48.142	7.414
LINE	L1	L1Md_A	UID-63	+	chr1	84451680	84458202	0.861	973	48.123	6.864
LINE	L1	L1Md_A	UID-665	+	chr3	72286924	72293706	0.873	1402	48.113	6.641
LINE	L1	L1Md_A	UID-265	+	chr5	69475530	69482104	0.839	2030	48.107	7.433
LINE	L1	L1Md_A	UID-430	+	chr16	70667393	70673768	0.887	1971	48.051	7.368
LINE	L1	L1Md_A	UID-2703	-	chr10	15336235	15342811	0.889	1787	48.045	7.483
LINE	L1	L1Md_A	UID-1339	+	chrX	80596221	80604235	0.845	1173	48.01	7.441
LINE	L1	L1Md_A	UID-1024	-	chr13	106526379	106533360	0.926	2605	47.993	7.318
LINE	L1	L1Md_A	UID-1640	+	chr2	159788599	159794967	0.894	1271	47.987	6.997
LINE	L1	L1Md_A	UID-675	+	chr3	91881555	91888131	0.889	1457	47.977	7.113
LINE	L1	L1Md_A	UID-2364	-	chr9	9619800	9626763	0.918	1651	47.971	7.643
LINE	L1	L1Md_A	UID-2498	-	chr7	20052607	20059394	0.889	1448	47.962	7.036
LINE	L1	L1Md_A	UID-2131	-	chr6	67000626	67009642	0.886	1446	47.948	7.453
LINE	L1	L1Md_A	UID-2734	+	chr10	35310087	35317086	0.891	1853	47.943	6.991
LINE	L1	L1Md_A	UID-1747	+	chr8	29548429	29554796	0.886	1372	47.915	7.244
LINE	L1	L1Md_A	UID-1782	+	chr8	66953475	66960259	0.892	1315	47.899	7.464
LINE	L1	L1Md_A	UID-2640	-	chr10	123490595	123497165	0.926	1944	47.886	7.32
LINE	L1	L1Md_A	UID-581	-	chr18	62619672	62626022	0.875	1678	47.884	7.069
LINE	L1	L1Md_A	UID-1117	+	chr13	92598997	92605404	0.895	1031	47.874	7.063
LINE	L1	L1Md_A	UID-1048	-	chr13	47520542	47528457	0.846	2888	47.872	7.759
LINE	L1	L1Md_A	UID-406	+	chr16	29516162	29523361	0.888	1610	47.862	7.568
LINE	L1	L1Md_A	UID-1438	+	chr4	34443001	34449590	0.881	2642	47.855	6.873
LINE	L1	L1Md_A	UID-526	+	chr18	28610899	28617267	0.903	1316	47.853	7.099
LINE	L1	L1Md_A	UID-2284	+	chr9	33907384	33914166	0.86	1921	47.851	7.291
LINE	L1	L1Md_A	UID-2610	-	chr12	57815797	57822165	0.914	1153	47.822	7.446
LINE	L1	L1Md_A	UID-212	-	chr1	19125733	19132274	0.901	2629	47.815	7.052
LINE	L1	L1Md_A	UID-2760	+	chr10	88095267	88101800	0.885	1463	47.812	7.35
LINE	L1	L1Md_A	UID-1113	+	chr13	90443043	90450005	0.832	1727	47.809	6.707
LINE	L1	L1Md_A	UID-246	+	chr5	46458476	46465872	0.888	2556	47.787	7.467
LINE	L1	L1Md_A	UID-61	+	chr1	84121707	84128075	0.901	1304	47.784	7.026
LINE	L1	L1Md_A	UID-2766	+	chr10	104493629	104499997	0.89	1956	47.729	6.831
LINE	L1	L1Md_A	UID-1454	+	chr4	68290096	68297094	0.889	1162	47.69	7.315
LINE	L1	L1Md_A	UID-1360	+	chrX	102560703	102567284	0.875	1770	47.69	6.595
LINE	L1	L1Md_A	UID-1696	-	chr2	63718186	63725386	0.87	1979	47.658	6.748
LINE	L1	L1Md_A	UID-742	-	chr3	83336601	83343161	0.865	1902	47.623	6.961
LINE	L1	L1Md_A	UID-1482	+	chr4	109538232	109544481	0.913	2017	47.582	6.918
LINE	L1	L1Md_A	UID-956	-	chr11	56226437	56233019	0.866	954	47.581	6.688
LINE	L1	L1Md_A	UID-2678	-	chr10	54142163	54148959	0.88	2111	47.571	6.828
LINE	L1	L1Md_A	UID-749	-	chr3	78332501	78339863	0.795	919	47.53	7.048
LINE	L1	L1Md_A	UID-1134	-	chrX	158564007	158570586	0.885	1625	47.518	7.361
LINE	L1	L1Md_A	UID-2516	+	chr12	14790874	14797657	0.888	1416	47.511	6.953
LINE	L1	L1Md_A	UID-2343	-	chr9	66632957	66639549	0.908	1591	47.51	7.317
LINE	L1	L1Md_A	UID-344	-	chr5	69117219	69124609	0.886	1693	47.499	7.357
LINE	L1	L1Md_A	UID-824	-	chr15	60058913	60065497	0.872	2526	47.499	6.76
LINE	L1	L1Md_A	UID-1840	-	chr8	58292083	58298869	0.9	1393	47.455	7.014
LINE	L1	L1Md_A	UID-357	-	chr5	52895681	52902847	0.888	2002	47.445	7.382
LINE	L1	L1Md_A	UID-1999	-	chr14	35527245	35533857	0.894	1325	47.442	6.887
LINE	L1	L1Md_A	UID-630	+	chr3	25290248	25296295	0.854	1903	47.431	6.921
LINE	L1	L1Md_A	UID-2774	+	chr10	107845370	107852985	0.902	2659	47.425	7.76
LINE	L1	L1Md_A	UID-759	-	chr3	64954900	64961045	0.916	2187	47.421	7.468
LINE	L1	L1Md_A	UID-216	-	chr1	15736582	15743579	0.904	1930	47.417	6.978
LINE	L1	L1Md_A	UID-168	-	chr1	104962585	104969607	0.896	2582	47.412	6.89
LINE	L1	L1Md_A	UID-1806	-	chr8	108337791	108344787	0.837	1535	47.402	6.666
LINE	L1	L1Md_A	UID-371	-	chr5	37579267	37585844	0.894	2442	47.391	7.174
LINE	L1	L1Md_A	UID-1706	-	chr2	53449157	53456166	0.872	1701	47.377	7.124
LINE	L1	L1Md_A	UID-533	+	chr18	33635125	33641535	0.903	1786	47.359	7
LINE	L1	L1Md_A	UID-951	-	chr11	73610773	73618187	0.875	1583	47.357	7.679
LINE	L1	L1Md_A	UID-2420	+	chr7	86984762	86991324	0.878	924	47.352	6.584
LINE	L1	L1Md_A	UID-1251	-	chrX	22512815	22519182	0.881	2048	47.313	6.989
LINE	L1	L1Md_A	UID-2642	-	chr10	122107462	122114667	0.888	1542	47.293	7.611
LINE	L1	L1Md_A	UID-1641	+	chr2	162594493	162602715	0.906	1829	47.29	7.327
LINE	L1	L1Md_A	UID-2604	-	chr12	67554893	67561669	0.905	1531	47.285	6.762
LINE	L1	L1Md_A	UID-895	+	chr15	65715991	65722341	0.866	1479	47.266	7.061
LINE	L1	L1Md_A	UID-580	-	chr18	63534646	63541623	0.854	2371	47.242	7.023
LINE	L1	L1Md_A	UID-2527	+	chr12	32535130	32542498	0.825	1327	47.237	7.28
LINE	L1	L1Md_A	UID-1941	-	chr14	123873825	123880817	0.908	2268	47.236	6.859
LINE	L1	L1Md_A	UID-592	-	chr18	40601781	40607947	0.879	1218	47.228	6.734
LINE	L1	L1Md_A	UID-1800	+	chr8	102246343	102252688	0.868	2189	47.221	6.849
LINE	L1	L1Md_A	UID-1851	-	chr8	42579611	42585971	0.856	1279	47.206	6.834
LINE	L1	L1Md_A	UID-943	+	chr11	92594567	92601631	0.862	3105	47.194	7.191
LINE	L1	L1Md_A	UID-810	-	chr15	94295441	94302062	0.908	1633	47.17	7.321
LINE	L1	L1Md_A	UID-1142	-	chrX	145233990	145240224	0.878	960	47.167	6.273
LINE	L1	L1Md_A	UID-732	-	chr3	118571876	118578243	0.888	2566	47.108	6.975
LINE	L1	L1Md_A	UID-1942	-	chr14	123804862	123811239	0.883	1296	47.093	6.891
LINE	L1	L1Md_A	UID-644	+	chr3	56371349	56378132	0.882	2013	47.089	6.864
LINE	L1	L1Md_A	UID-1023	-	chr13	108394331	108400890	0.904	1580	47.087	6.603
LINE	L1	L1Md_A	UID-791	-	chr3	24187173	24193541	0.875	1932	47.086	6.674
LINE	L1	L1Md_A	UID-2305	+	chr9	86941367	86947512	0.884	1041	47.076	6.873
LINE	L1	L1Md_A	UID-2540	+	chr12	44231315	44237897	0.914	1305	47.075	7.385
LINE	L1	L1Md_A	UID-2324	-	chr9	94636043	94642619	0.88	2497	47.034	7.226
LINE	L1	L1Md_A	UID-676	+	chr3	93922020	93928995	0.848	1501	47.017	6.981
LINE	L1	L1Md_A	UID-2283	+	chr9	33040609	33048416	0.896	2857	47.011	8.05
LINE	L1	L1Md_A	UID-1390	+	chrX	144115843	144123049	0.898	1461	47.008	7.528
LINE	L1	L1Md_A	UID-656	+	chr3	64813787	64820784	0.915	2394	47	7.336
LINE	L1	L1Md_A	UID-1921	+	chr14	100737330	100743897	0.878	1984	46.955	6.83
LINE	L1	L1Md_A	UID-1645	-	chr2	181739791	181746159	0.887	1071	46.952	6.997
LINE	L1	L1Md_A	UID-274	+	chr5	77536497	77542664	0.873	2101	46.945	7.095
LINE	L1	L1Md_A	UID-2712	+	chr10	10584435	10591225	0.932	2274	46.938	6.966
LINE	L1	L1Md_A	UID-2665	-	chr10	73576354	73583126	0.895	1790	46.936	7.082
LINE	L1	L1Md_A	UID-153	-	chr1	118581793	118588576	0.901	1435	46.929	7.605
LINE	L1	L1Md_A	UID-2318	-	chr9	118004827	118011384	0.879	1304	46.904	6.808
LINE	L1	L1Md_A	UID-2744	+	chr10	51034303	51041093	0.893	2269	46.881	7.106
LINE	L1	L1Md_A	UID-893	+	chr15	61026375	61033141	0.888	1167	46.87	6.782
LINE	L1	L1Md_A	UID-1444	+	chr4	51298876	51305870	0.868	1636	46.855	6.874
LINE	L1	L1Md_A	UID-1847	-	chr8	52594838	52601215	0.868	1162	46.85	6.896
LINE	L1	L1Md_A	UID-1200	-	chrX	80578954	80585305	0.885	1254	46.841	6.906
LINE	L1	L1Md_A	UID-921	+	chr11	37633902	37640269	0.864	2775	46.826	6.955
LINE	L1	L1Md_A	UID-880	+	chr15	46888413	46894979	0.816	1017	46.799	6.828
LINE	L1	L1Md_A	UID-2462	-	chr7	84467666	84475266	0.92	1305	46.793	7.618
LINE	L1	L1Md_A	UID-2164	-	chr6	23855815	23862177	0.859	1295	46.767	7.091
LINE	L1	L1Md_A	UID-565	-	chr18	88297253	88303749	0.891	2638	46.721	6.737
LINE	L1	L1Md_A	UID-1665	-	chr2	109629359	109635924	0.913	1305	46.681	6.705
LINE	L1	L1Md_A	UID-1985	-	chr14	58246442	58253067	0.888	1455	46.637	7.083
LINE	L1	L1Md_A	UID-2295	+	chr9	54357064	54363829	0.85	1477	46.629	7.295
LINE	L1	L1Md_A	UID-659	+	chr3	66071397	66077964	0.841	1654	46.614	6.62
LINE	L1	L1Md_A	UID-1219	-	chrX	62884848	62891584	0.876	1328	46.608	6.573
LINE	L1	L1Md_A	UID-2205	+	chr6	28178153	28184528	0.886	1600	46.605	6.903
LINE	L1	L1Md_A	UID-1306	+	chrX	51436692	51443059	0.901	2394	46.59	6.954
LINE	L1	L1Md_A	UID-1118	+	chr13	100233919	100240709	0.855	1301	46.575	7.362
LINE	L1	L1Md_A	UID-399	+	chr16	21597595	21603962	0.892	1414	46.57	7.043
LINE	L1	L1Md_A	UID-2553	+	chr12	64886730	64893728	0.894	1266	46.569	6.908
LINE	L1	L1Md_A	UID-135	-	chr1	157877240	157884030	0.87	2007	46.54	6.593
LINE	L1	L1Md_A	UID-189	-	chr1	63829969	63836534	0.884	1852	46.518	7.16
LINE	L1	L1Md_A	UID-2241	+	chr6	84713492	84720284	0.887	2116	46.513	7.072
LINE	L1	L1Md_A	UID-1218	-	chrX	63120435	63126945	0.925	2087	46.496	7.21
LINE	L1	L1Md_A	UID-513	+	chr18	15695105	15701895	0.9	1102	46.496	7.331
LINE	L1	L1Md_A	UID-2601	-	chr12	68705447	68711815	0.882	1611	46.485	6.565
LINE	L1	L1Md_A	UID-2299	+	chr9	73396715	73403499	0.884	1445	46.465	6.542
LINE	L1	L1Md_A	UID-2234	+	chr6	76847138	76854115	0.862	2992	46.428	6.947
LINE	L1	L1Md_A	UID-1172	-	chrX	109977596	109984565	0.91	1663	46.419	7.239
LINE	L1	L1Md_A	UID-1443	+	chr4	49731456	49738477	0.889	2897	46.398	7.059
LINE	L1	L1Md_A	UID-1977	-	chr14	71621165	71627533	0.867	1499	46.39	6.577
LINE	L1	L1Md_A	UID-1394	+	chrX	151501917	151508229	0.877	1308	46.383	7.018
LINE	L1	L1Md_A	UID-878	+	chr15	42876856	42883829	0.891	1356	46.382	6.976
LINE	L1	L1Md_A	UID-1383	+	chrX	129356926	129363289	0.859	2884	46.375	6.974
LINE	L1	L1Md_A	UID-2763	+	chr10	101566787	101573598	0.854	1457	46.354	6.815
LINE	L1	L1Md_A	UID-464	-	chr16	76635552	76642319	0.948	2417	46.35	7.292
LINE	L1	L1Md_A	UID-185	-	chr1	71079638	71086422	0.918	1960	46.332	7.045
LINE	L1	L1Md_A	UID-2099	-	chr6	116740273	116747479	0.915	3740	46.327	7.941	Fig. 6
LINE	L1	L1Md_A	UID-2605	-	chr12	67275681	67282049	0.937	1591	46.318	7.084
LINE	L1	L1Md_A	UID-832	-	chr15	51030822	51037395	0.903	1305	46.301	7.096
LINE	L1	L1Md_A	UID-471	-	chr16	71147702	71154268	0.872	1430	46.255	7.268
LINE	L1	L1Md_A	UID-788	-	chr3	26391284	26397640	0.885	1694	46.247	7.103
LINE	L1	L1Md_A	UID-281	+	chr5	85822676	85829042	0.879	1920	46.246	7.146
LINE	L1	L1Md_A	UID-2563	+	chr12	93920319	93926901	0.829	1533	46.231	6.546
LINE	L1	L1Md_A	UID-2133	-	chr6	66648541	66656163	0.938	1683	46.216	7.993
LINE	L1	L1Md_A	UID-387	-	chr5	9304721	9311047	0.898	1435	46.21	6.902
LINE	L1	L1Md_A	UID-1961	-	chr14	100649125	100655909	0.908	1305	46.205	7.131
LINE	L1	L1Md_A	UID-957	-	chr11	56177123	56183511	0.877	2039	46.191	6.597
LINE	L1	L1Md_A	UID-1012	-	chr19	24827028	24833407	0.918	1460	46.184	6.736
LINE	L1	L1Md_A	UID-1873	-	chr8	18259126	18265294	0.903	2146	46.166	7.105
LINE	L1	L1Md_A	UID-726	-	chr3	125208665	125215634	0.883	1522	46.083	6.854
LINE	L1	L1Md_A	UID-469	-	chr16	73547167	73554129	0.899	1627	46.078	6.817
LINE	L1	L1Md_A	UID-1406	+	chrX	162668747	162675531	0.821	1338	46.072	6.538
LINE	L1	L1Md_A	UID-1088	+	chr13	47739987	47746560	0.877	1238	46.051	6.688
LINE	L1	L1Md_A	UID-100	+	chr1	148378685	148385676	0.845	2208	46.049	6.677
LINE	L1	L1Md_A	UID-721	-	chr3	140864993	140871134	0.865	2361	46.03	6.762
LINE	L1	L1Md_A	UID-862	+	chr15	5368954	5375722	0.878	1145	46.025	6.755
LINE	L1	L1Md_A	UID-2691	-	chr10	33572280	33578630	0.979	3073	46.009	6.65
LINE	L1	L1Md_A	UID-1649	-	chr2	140733306	140740060	0.867	1530	46.007	6.941
LINE	L1	L1Md_A	UID-1810	-	chr8	101374592	101380949	0.852	1695	45.934	6.987
LINE	L1	L1Md_A	UID-2101	-	chr6	114759427	114765596	0.91	1388	45.916	6.57
LINE	L1	L1Md_A	UID-762	-	chr3	60430591	60437166	0.898	1723	45.908	6.895
LINE	L1	L1Md_A	UID-981	-	chr11	12139511	12147131	0.862	1962	45.89	6.706
LINE	L1	L1Md_A	UID-1049	-	chr13	39049931	39056697	0.9	2463	45.879	7.127
LINE	L1	L1Md_A	UID-907	+	chr11	10529310	10535851	0.852	1336	45.836	6.831
LINE	L1	L1Md_A	UID-1669	-	chr2	107134091	107140881	0.905	1305	45.79	7.088
LINE	L1	L1Md_A	UID-46	+	chr1	61670737	61677313	0.902	2544	45.785	7.093
LINE	L1	L1Md_A	UID-1898	+	chr14	42737595	42744177	0.875	1249	45.768	6.968
LINE	L1	L1Md_A	UID-647	+	chr3	58186689	58193241	0.897	1711	45.762	7.22
LINE	L1	L1Md_A	UID-95	+	chr1	144806922	144813276	0.899	1304	45.742	6.821
LINE	L1	L1Md_A	UID-1695	-	chr2	64194063	64200431	0.894	2661	45.742	7.209
LINE	L1	L1Md_A	UID-1239	-	chrX	43225875	43232249	0.903	2908	45.741	7.273
LINE	L1	L1Md_A	UID-2189	+	chr6	12620931	12627513	0.896	1589	45.74	7.378
LINE	L1	L1Md_A	UID-763	-	chr3	60231546	60237895	0.876	1669	45.724	6.578
LINE	L1	L1Md_A	UID-1436	+	chr4	29246913	29253493	0.866	2575	45.717	7.053
LINE	L1	L1Md_A	UID-1731	-	chr2	16102453	16109230	0.876	1878	45.706	6.69
LINE	L1	L1Md_A	UID-183	-	chr1	78949105	78955451	0.869	1785	45.678	6.793
LINE	L1	L1Md_A	UID-657	+	chr3	64922878	64929029	0.895	1366	45.661	7.029
LINE	L1	L1Md_A	UID-1151	-	chrX	130799788	130806161	0.84	909	45.655	6.414
LINE	L1	L1Md_A	UID-301	+	chr5	145506616	145512994	0.914	2195	45.654	7.147
LINE	L1	L1Md_A	UID-1604	+	chr2	78012782	78019769	0.881	1304	45.647	6.356
LINE	L1	L1Md_A	UID-1442	+	chr4	49328516	49335765	0.864	947	45.623	6.47
LINE	L1	L1Md_A	UID-236	+	chr5	25131190	25137345	0.879	1681	45.619	6.664
LINE	L1	L1Md_A	UID-1402	+	chrX	158142202	158148787	0.863	1308	45.606	6.609
LINE	L1	L1Md_A	UID-2761	+	chr10	91332181	91338970	0.864	1345	45.576	6.838
LINE	L1	L1Md_A	UID-2622	-	chr12	41136892	41143260	0.91	2037	45.575	7.054
LINE	L1	L1Md_A	UID-1155	-	chrX	128707945	128714735	0.822	1593	45.553	6.755
LINE	L1	L1Md_A	UID-802	-	chr3	6601835	6608618	0.903	1572	45.552	6.838
LINE	L1	L1Md_A	UID-790	-	chr3	25472891	25479264	0.887	1720	45.494	6.578
LINE	L1	L1Md_A	UID-2287	+	chr9	40064115	40070691	0.888	2416	45.476	6.859
LINE	L1	L1Md_A	UID-1028	-	chr13	100921327	100927903	0.902	2460	45.452	6.651
LINE	L1	L1Md_A	UID-1651	-	chr2	137399278	137405652	0.873	2420	45.45	6.956
LINE	L1	L1Md_A	UID-2290	+	chr9	52610808	52617175	0.867	2473	45.45	7.204
LINE	L1	L1Md_A	UID-2330	-	chr9	88666291	88672657	0.871	2511	45.416	6.798
LINE	L1	L1Md_A	UID-284	+	chr5	91630965	91637526	0.909	1304	45.388	7.068
LINE	L1	L1Md_A	UID-2490	-	chr7	41165817	41175526	0.892	2482	45.378	7.86
LINE	L1	L1Md_A	UID-2146	-	chr6	46220771	46226775	0.836	1737	45.343	6.135
LINE	L1	L1Md_A	UID-2391	+	chr7	53855658	53861883	0.807	2599	45.314	6.596
LINE	L1	L1Md_A	UID-1915	+	chr14	79919469	79925837	0.882	2214	45.287	6.567
LINE	L1	L1Md_A	UID-1517	-	chr4	85477274	85483639	0.905	1031	45.286	6.747
LINE	L1	L1Md_A	UID-248	+	chr5	49737565	49745181	0.897	1181	45.285	6.757
LINE	L1	L1Md_A	UID-1114	+	chr13	90663479	90670055	0.816	1423	45.26	6.262
LINE	L1	L1Md_A	UID-739	-	chr3	99612720	99619063	0.873	1043	45.22	6.837
LINE	L1	L1Md_A	UID-416	+	chr16	49447646	49454055	0.878	2679	45.195	6.96
LINE	L1	L1Md_A	UID-708	+	chr3	149971124	149977223	0.88	1033	45.194	6.657
LINE	L1	L1Md_A	UID-2153	-	chr6	40986314	40992896	0.883	1391	45.127	6.362
LINE	L1	L1Md_A	UID-546	+	chr18	66939863	66946638	0.876	1322	45.117	6.568
LINE	L1	L1Md_A	UID-1080	+	chr13	26048775	26055171	0.89	1073	45.095	6.875
LINE	L1	L1Md_A	UID-873	+	chr15	29983566	29990625	0.869	1449	45.084	6.369
LINE	L1	L1Md_A	UID-148	-	chr1	137149645	137156435	0.898	2768	45.072	6.762
LINE	L1	L1Md_A	UID-1263	-	chrX	9427293	9434271	0.904	1560	45.07	7.329
LINE	L1	L1Md_A	UID-821	-	chr15	61831504	61838503	0.87	1452	45.059	6.964
LINE	L1	L1Md_A	UID-2401	+	chr7	60209360	60215536	0.895	2051	45.058	6.925
LINE	L1	L1Md_A	UID-94	+	chr1	144065258	144071635	0.838	2263	45.043	6.854
LINE	L1	L1Md_A	UID-1703	-	chr2	54593635	54600626	0.858	1097	45.035	6.513
LINE	L1	L1Md_A	UID-1475	+	chr4	95509751	95516957	0.847	1167	45.029	6.558
LINE	L1	L1Md_A	UID-2385	+	chr7	41845163	41851953	0.9	1370	44.96	6.593
LINE	L1	L1Md_A	UID-96	+	chr1	146445274	146451863	0.89	1121	44.96	6.349
LINE	L1	L1Md_A	UID-1308	+	chrX	56081615	56088190	0.88	970	44.944	6.94
LINE	L1	L1Md_A	UID-755	-	chr3	70672977	70679143	0.835	1630	44.921	6.386
LINE	L1	L1Md_A	UID-517	+	chr18	19612322	19618894	0.876	1129	44.911	6.727
LINE	L1	L1Md_A	UID-264	+	chr5	68137204	68144010	0.883	1678	44.9	6.366
LINE	L1	L1Md_A	UID-1743	+	chr8	16920297	16926671	0.875	1031	44.891	6.222
LINE	L1	L1Md_A	UID-2121	-	chr6	76677975	76684342	0.902	1305	44.85	6.776
LINE	L1	L1Md_A	UID-1480	+	chr4	105822223	105828383	0.849	1304	44.785	6.922
LINE	L1	L1Md_A	UID-2443	-	chr7	123764947	123771333	0.89	1253	44.71	6.716
LINE	L1	L1Md_A	UID-1778	+	chr8	63473793	63480129	0.862	1385	44.697	6.536
LINE	L1	L1Md_A	UID-1546	-	chr4	50191022	50197390	0.86	1206	44.697	6.814
LINE	L1	L1Md_A	UID-715	-	chr3	154023455	154030243	0.849	2015	44.652	5.944
LINE	L1	L1Md_A	UID-710	+	chr3	158112562	158118930	0.873	868	44.651	6.61
LINE	L1	L1Md_A	UID-1790	+	chr8	81910991	81917345	0.875	2070	44.65	6.952
LINE	L1	L1Md_A	UID-1031	-	chr13	85463008	85470613	0.847	1002	44.627	6.674
LINE	L1	L1Md_A	UID-1357	+	chrX	97907903	97914449	0.909	1304	44.597	7.043
LINE	L1	L1Md_A	UID-1952	-	chr14	113793292	113799875	0.878	1208	44.569	6.558
LINE	L1	L1Md_A	UID-2561	+	chr12	91163964	91170747	0.849	1475	44.545	6.433
LINE	L1	L1Md_A	UID-68	+	chr1	99183200	99189606	0.878	1568	44.537	6.657
LINE	L1	L1Md_A	UID-682	+	chr3	110209317	110215684	0.881	2765	44.533	7.106
LINE	L1	L1Md_A	UID-1305	+	chrX	51270608	51277184	0.879	1149	44.53	6.55
LINE	L1	L1Md_A	UID-1006	-	chr19	59814084	59820229	0.902	2641	44.522	6.693
LINE	L1	L1Md_A	UID-1597	+	chr2	57553117	57559485	0.855	1268	44.502	6.454
LINE	L1	L1Md_A	UID-1187	-	chrX	92268599	92275175	0.861	1868	44.467	6.919
LINE	L1	L1Md_A	UID-2682	-	chr10	51223082	51229251	0.902	1109	44.453	6.279
LINE	L1	L1Md_A	UID-2428	+	chr7	103282663	103289690	0.838	1514	44.442	6.855
LINE	L1	L1Md_A	UID-1129	-	chrX	161706181	161712757	0.857	1959	44.418	6.752
LINE	L1	L1Md_A	UID-366	-	chr5	42748458	42755015	0.842	1264	44.385	6.819
LINE	L1	L1Md_A	UID-1786	+	chr8	74717537	74724284	0.833	815	44.367	5.894
LINE	L1	L1Md_A	UID-296	+	chr5	131340687	131347006	0.887	2314	44.346	7.076
LINE	L1	L1Md_A	UID-1149	-	chrX	133875150	133881934	0.884	1536	44.312	6.658
LINE	L1	L1Md_A	UID-2506	-	chr7	5553344	5559909	0.915	1050	44.271	6.531
LINE	L1	L1Md_A	UID-2505	-	chr7	5553344	5559909	0.915	1050	44.271	6.531
LINE	L1	L1Md_A	UID-2173	-	chr6	14648319	14654883	0.9	1023	44.271	6.613
LINE	L1	L1Md_A	UID-1437	+	chr4	31527896	31534329	0.886	1316	44.263	6.734
LINE	L1	L1Md_A	UID-1995	-	chr14	39757526	39764720	0.918	1639	44.26	6.891
LINE	L1	L1Md_A	UID-2501	-	chr7	13415712	13421936	0.849	1461	44.241	6.131
LINE	L1	L1Md_A	UID-1818	-	chr8	93111203	93117778	0.889	2142	44.233	7.438
LINE	L1	L1Md_A	UID-230	+	chr5	11064159	11070958	0.808	2649	44.204	6.553
LINE	L1	L1Md_A	UID-404	+	chr16	28292919	28301360	0.859	1114	44.175	7.022
LINE	L1	L1Md_A	UID-1091	+	chr13	50689798	50696319	0.875	1031	44.174	6.934
LINE	L1	L1Md_A	UID-1734	-	chr2	10547860	10554852	0.885	1876	44.157	7.466
LINE	L1	L1Md_A	UID-2312	+	chr9	105333746	105340722	0.882	2767	44.153	6.711
LINE	L1	L1Md_A	UID-1723	-	chr2	36437300	36444076	0.904	1362	44.147	6.676
LINE	L1	L1Md_A	UID-1123	+	chr13	106381474	106387824	0.883	2076	44.131	6.696
LINE	L1	L1Md_A	UID-803	-	chr3	6472312	6478841	0.888	2296	44.102	7.205
LINE	L1	L1Md_A	UID-747	-	chr3	78770246	78777236	0.877	2235	44.064	6.987
LINE	L1	L1Md_A	UID-694	+	chr3	125075869	125082440	0.868	1235	44.064	6.649
LINE	L1	L1Md_A	UID-2616	-	chr12	47859464	47866253	0.892	1216	44.062	6.436
LINE	L1	L1Md_A	UID-1693	-	chr2	78140184	78146725	0.818	1889	44.061	6.453
LINE	L1	L1Md_A	UID-833	-	chr15	49372291	49379699	0.87	1133	44.048	6.702
LINE	L1	L1Md_A	UID-312	-	chr5	103122739	103129112	0.89	1411	44.021	6.65
LINE	L1	L1Md_A	UID-1802	-	chr8	129272897	129279260	0.905	1851	44.018	7.056
LINE	L1	L1Md_A	UID-1325	+	chrX	70264111	70270872	0.889	1510	44.011	6.929
LINE	L1	L1Md_A	UID-1920	+	chr14	95055266	95061424	0.877	2117	43.974	6.773
LINE	L1	L1Md_A	UID-501	-	chr16	27071899	27079261	0.769	1039	43.96	5.923
LINE	L1	L1Md_A	UID-2415	+	chr7	76832500	76839486	0.859	1031	43.95	5.967
LINE	L1	L1Md_A	UID-946	-	chr11	104649230	104655580	0.903	1794	43.918	6.796
LINE	L1	L1Md_A	UID-2010	-	chr14	12247112	12254076	0.853	1266	43.909	6.465
LINE	L1	L1Md_A	UID-1074	+	chr13	8808566	8815959	0.89	1131	43.889	7.279
LINE	L1	L1Md_A	UID-2257	+	chr6	109641749	109648118	0.848	1079	43.889	6.08
LINE	L1	L1Md_A	UID-2681	-	chr10	52134611	52141122	0.879	1975	43.888	6.249
LINE	L1	L1Md_A	UID-1447	+	chr4	56434617	56442172	0.855	2104	43.886	5.855
LINE	L1	L1Md_A	UID-211	-	chr1	19687174	19693551	0.879	2439	43.868	6.785
LINE	L1	L1Md_A	UID-626	+	chr3	21191915	21198698	0.88	943	43.832	5.877
LINE	L1	L1Md_A	UID-12	+	chr1	20574495	20581053	0.827	1973	43.827	7.123
LINE	L1	L1Md_A	UID-437	+	chr16	75736754	75743329	0.918	1050	43.811	7.106
LINE	L1	L1Md_A	UID-478	-	chr16	64396813	64403596	0.85	1152	43.746	6.414
LINE	L1	L1Md_A	UID-13	+	chr1	23885270	23891642	0.908	2322	43.743	6.782
LINE	L1	L1Md_A	UID-751	-	chr3	76086909	76093277	0.871	1377	43.723	6.748
LINE	L1	L1Md_A	UID-625	+	chr3	19462153	19468503	0.864	1168	43.674	6.349
LINE	L1	L1Md_A	UID-688	+	chr3	118104849	118111226	0.825	2558	43.668	6.55
LINE	L1	L1Md_A	UID-1744	+	chr8	21602223	21608339	0.863	947	43.667	6.073
LINE	L1	L1Md_A	UID-1953	-	chr14	113250399	113256774	0.865	984	43.625	6.161
LINE	L1	L1Md_A	UID-427	+	chr16	67934066	67940655	0.844	1632	43.611	6.768
LINE	L1	L1Md_A	UID-2645	-	chr10	113382951	113389353	0.743	1703	43.58	5.871
LINE	L1	L1Md_A	UID-346	-	chr5	68213177	68222236	0.849	1467	43.548	7.213
LINE	L1	L1Md_A	UID-1568	-	chr4	12706932	12713508	0.889	1305	43.52	6.65
LINE	L1	L1Md_A	UID-309	-	chr5	105372664	105379018	0.827	1451	43.496	6.592
LINE	L1	L1Md_A	UID-308	-	chr5	105372664	105379018	0.827	1451	43.496	6.592
LINE	L1	L1Md_A	UID-1321	+	chrX	66608636	66615249	0.866	979	43.49	5.983
LINE	L1	L1Md_A	UID-1540	-	chr4	54149469	54155837	0.9	990	43.462	6.355
LINE	L1	L1Md_A	UID-1522	-	chr4	76207753	76215149	0.904	2827	43.444	7.219
LINE	L1	L1Md_A	UID-1304	+	chrX	50211682	50218169	0.865	798	43.418	5.584
LINE	L1	L1Md_A	UID-2323	-	chr9	105623531	105629889	0.783	2035	43.387	6.284
LINE	L1	L1Md_A	UID-858	-	chr15	10771958	10778905	0.883	1305	43.327	6.933
LINE	L1	L1Md_A	UID-479	-	chr16	63722008	63728337	0.888	2588	43.298	6.907
LINE	L1	L1Md_A	UID-640	+	chr3	46140925	46148131	0.872	959	43.249	6.624
LINE	L1	L1Md_A	UID-564	-	chr18	88939841	88946254	0.893	1316	43.244	6.403
LINE	L1	L1Md_A	UID-2029	+	chr17	37853519	37860084	0.891	1109	43.238	7.017
LINE	L1	L1Md_A	UID-2179	-	chr6	7918266	7925056	0.914	1265	43.221	6.59
LINE	L1	L1Md_A	UID-208	-	chr1	30036185	30043464	0.874	1638	43.184	7.191
LINE	L1	L1Md_A	UID-1115	+	chr13	91728379	91735377	0.862	1736	43.156	7.084
LINE	L1	L1Md_A	UID-1257	-	chrX	18715565	18722765	0.913	2022	43.151	7.297
LINE	L1	L1Md_A	UID-2577	-	chr12	114324623	114331616	0.869	924	43.098	6.705
LINE	L1	L1Md_A	UID-1342	+	chrX	81412969	81419531	0.891	2373	43.079	6.806
LINE	L1	L1Md_A	UID-1897	+	chr14	42335988	42342569	0.875	2431	43.071	6.766
LINE	L1	L1Md_A	UID-473	-	chr16	70367399	70373576	0.857	2414	43.068	6.443
LINE	L1	L1Md_A	UID-2769	+	chr10	106080167	106086688	0.904	1490	43.059	6.578
LINE	L1	L1Md_A	UID-298	+	chr5	133321811	133328792	0.891	1007	43.057	7.065
LINE	L1	L1Md_A	UID-1062	-	chr13	14802779	14809771	0.887	1182	43.043	6.542
LINE	L1	L1Md_A	UID-1233	-	chrX	50158476	50164953	0.895	1048	43.03	6.887
LINE	L1	L1Md_A	UID-1783	+	chr8	72889433	72895780	0.866	1453	43.03	6.876
LINE	L1	L1Md_A	UID-2368	+	chr7	4017920	4024496	0.88	1433	43.017	7.148
LINE	L1	L1Md_A	UID-1345	+	chrX	86821587	86828565	0.867	2032	42.968	6.926
LINE	L1	L1Md_A	UID-2326	-	chr9	93029022	93035344	0.851	1133	42.902	6.509
LINE	L1	L1Md_A	UID-2685	-	chr10	46966691	46974689	0.879	2165	42.889	6.526
LINE	L1	L1Md_A	UID-1554	-	chr4	23107586	23114162	0.877	1305	42.871	5.896
LINE	L1	L1Md_A	UID-947	-	chr11	99882890	99890123	0.807	1733	42.87	6.271
LINE	L1	L1Md_A	UID-2659	-	chr10	93054194	93060565	0.84	2041	42.86	6.684
LINE	L1	L1Md_A	UID-2632	-	chr12	15866016	15872391	0.875	1268	42.822	6.123
LINE	L1	L1Md_A	UID-1382	+	chrX	126821135	126827885	0.882	1438	42.813	6.934
LINE	L1	L1Md_A	UID-2661	-	chr10	91928802	91935229	0.796	2133	42.813	6.247
LINE	L1	L1Md_A	UID-786	-	chr3	29087883	29094416	0.908	1396	42.807	5.91
LINE	L1	L1Md_A	UID-395	+	chr16	15404289	15410854	0.886	1912	42.799	7.015
LINE	L1	L1Md_A	UID-1770	+	chr8	57170825	57177193	0.87	1304	42.798	6.904
LINE	L1	L1Md_A	UID-2799	-	chrY	1864637	1870796	0.882	905	42.712	6.295
LINE	L1	L1Md_A	UID-1072	+	chr13	5063894	5070684	0.865	1816	42.628	5.941
LINE	L1	L1Md_A	UID-2791	-	chrY	30089882	30096412	0.889	1312	42.624	6.561
LINE	L1	L1Md_A	UID-2576	-	chr12	116541030	116547598	0.886	1858	42.612	6.209
LINE	L1	L1Md_A	UID-2790	-	chrY	30353459	30359989	0.889	1311	42.611	6.561
LINE	L1	L1Md_A	UID-1833	-	chr8	65830540	65837066	0.869	1243	42.591	6.261
LINE	L1	L1Md_A	UID-794	-	chr3	21317839	21324615	0.855	967	42.59	5.811
LINE	L1	L1Md_A	UID-2409	+	chr7	72650244	72660761	0.838	909	42.568	6.718
LINE	L1	L1Md_A	UID-1745	+	chr8	27695946	27702304	0.806	1374	42.55	6.015
LINE	L1	L1Md_A	UID-496	-	chr16	45050207	45056377	0.89	1733	42.54	5.945
LINE	L1	L1Md_A	UID-2432	+	chr7	107471212	107477817	0.817	1146	42.485	6.775
LINE	L1	L1Md_A	UID-2339	-	chr9	74664727	74670839	0.859	1400	42.47	5.856
LINE	L1	L1Md_A	UID-349	-	chr5	61307791	61313961	0.858	2350	42.466	6.121
LINE	L1	L1Md_A	UID-307	-	chr5	116605234	116611584	0.866	1790	42.425	6.602
LINE	L1	L1Md_A	UID-413	+	chr16	47557552	47564154	0.771	1557	42.404	5.679
LINE	L1	L1Md_A	UID-1917	+	chr14	84937720	84944071	0.864	909	42.392	6.833
LINE	L1	L1Md_A	UID-1175	-	chrX	107730821	107737466	0.784	2165	42.391	6.356
LINE	L1	L1Md_A	UID-2082	-	chr17	40120549	40127113	0.89	1091	42.36	6.859
LINE	L1	L1Md_A	UID-2807	+	chrY	60684091	60690621	0.883	1124	42.339	6.451
LINE	L1	L1Md_A	UID-2072	-	chr17	59576804	59583380	0.878	1031	42.321	6.367
LINE	L1	L1Md_A	UID-1729	-	chr2	16620968	16627128	0.852	1002	42.32	5.932
LINE	L1	L1Md_A	UID-255	+	chr5	59310644	59317011	0.84	887	42.296	5.878
LINE	L1	L1Md_A	UID-458	-	chr16	87296351	87302744	0.886	1031	42.283	6.363
LINE	L1	L1Md_A	UID-2202	+	chr6	26834532	26840941	0.812	1129	42.274	5.934
LINE	L1	L1Md_A	UID-146	-	chr1	137710020	137716602	0.877	1666	42.232	6.163
LINE	L1	L1Md_A	UID-76	+	chr1	114731665	114737825	0.853	2639	42.231	6.614
LINE	L1	L1Md_A	UID-1163	-	chrX	123335114	123342112	0.861	1133	42.139	6.846
LINE	L1	L1Md_A	UID-557	+	chr18	85897409	85903986	0.863	1407	42.119	6.384
LINE	L1	L1Md_A	UID-2136	-	chr6	63579869	63586309	0.895	2445	42.111	6.732
LINE	L1	L1Md_A	UID-1557	-	chr4	20168653	20175250	0.896	1260	42.109	6.718
LINE	L1	L1Md_A	UID-1414	+	chr4	6649189	6655993	0.81	1643	42.091	5.701
LINE	L1	L1Md_A	UID-2096	-	chr6	131924858	131931848	0.863	1155	42.055	6.22
LINE	L1	L1Md_A	UID-2383	+	chr7	40108734	40115290	0.864	1199	42.051	6.32
LINE	L1	L1Md_A	UID-2019	+	chr17	4082095	4088255	0.862	2634	42.042	6.676
LINE	L1	L1Md_A	UID-2453	-	chr7	94842296	94848855	0.865	969	42.036	6.13
LINE	L1	L1Md_A	UID-2500	-	chr7	17241905	17248674	0.889	955	42.035	6.501
LINE	L1	L1Md_A	UID-2278	+	chr9	17059000	17065558	0.903	1031	42.02	6.191
LINE	L1	L1Md_A	UID-2806	+	chrY	47893711	47900241	0.882	1124	42.015	6.429
LINE	L1	L1Md_A	UID-1757	+	chr8	42858065	42864436	0.809	1461	41.992	6.115
LINE	L1	L1Md_A	UID-1510	-	chr4	91782697	91789042	0.842	763	41.967	5.552
LINE	L1	L1Md_A	UID-1746	+	chr8	27729212	27735995	0.816	1060	41.959	5.984
LINE	L1	L1Md_A	UID-1280	+	chrX	29151397	29158212	0.814	1229	41.898	6.461
LINE	L1	L1Md_A	UID-1965	-	chr14	84403804	84410172	0.819	914	41.883	5.849
LINE	L1	L1Md_A	UID-1502	-	chr4	101753581	101759926	0.901	940	41.796	6.49
LINE	L1	L1Md_A	UID-2139	-	chr6	61978911	61985288	0.879	1676	41.757	6.618
LINE	L1	L1Md_A	UID-1658	-	chr2	123205429	123211786	0.792	2164	41.757	6.058
LINE	L1	L1Md_A	UID-940	+	chr11	81430884	81437275	0.84	1770	41.728	6.31
LINE	L1	L1Md_A	UID-338	-	chr5	79736698	79743064	0.879	1442	41.714	5.493
LINE	L1	L1Md_A	UID-1196	-	chrX	86217839	86224232	0.706	1468	41.708	5.448
LINE	L1	L1Md_A	UID-24	+	chr1	33045963	33052406	0.844	2108	41.688	6.891
LINE	L1	L1Md_A	UID-1854	-	chr8	41226167	41232742	0.907	1802	41.685	6.456
LINE	L1	L1Md_A	UID-2354	-	chr9	36013778	36020158	0.848	999	41.584	6.51
LINE	L1	L1Md_A	UID-297	+	chr5	133256463	133263214	0.784	997	41.542	5.037
LINE	L1	L1Md_A	UID-1767	+	chr8	52426820	52433201	0.869	1023	41.478	6.718
LINE	L1	L1Md_A	UID-2269	+	chr6	144826009	144833016	0.798	1326	41.468	6.298
LINE	L1	L1Md_A	UID-595	-	chr18	30802264	30808608	0.865	2100	41.448	6.38
LINE	L1	L1Md_A	UID-1279	+	chrX	28151137	28157951	0.784	1229	41.438	6.34
LINE	L1	L1Md_A	UID-2080	-	chr17	45103349	45110921	0.896	2494	41.433	6.974
LINE	L1	L1Md_A	UID-1161	-	chrX	126402933	126409911	0.898	996	41.416	6.762
LINE	L1	L1Md_A	UID-1668	-	chr2	107741774	107748155	0.915	2322	41.39	6.238
LINE	L1	L1Md_A	UID-1654	-	chr2	133965099	133971878	0.886	1305	41.369	6.36
LINE	L1	L1Md_A	UID-870	+	chr15	23729225	23735635	0.869	1279	41.365	6.312
LINE	L1	L1Md_A	UID-986	+	chr19	13210034	13216399	0.872	997	41.342	6.962
LINE	L1	L1Md_A	UID-1249	-	chrX	32618370	32624952	0.879	1557	41.325	6.509
LINE	L1	L1Md_A	UID-1756	+	chr8	42816721	42823280	0.835	2175	41.294	6.161
LINE	L1	L1Md_A	UID-2611	-	chr12	52216687	52223303	0.802	1617	41.273	6.251
LINE	L1	L1Md_A	UID-1718	-	chr2	42044471	42051670	0.863	1207	41.267	6.162
LINE	L1	L1Md_A	UID-1993	-	chr14	42377652	42384231	0.852	1113	41.229	5.701
LINE	L1	L1Md_A	UID-1896	+	chr14	40844365	40851153	0.861	1375	41.19	6.667
LINE	L1	L1Md_A	UID-596	-	chr18	28622985	28630429	0.866	691	41.185	6.637
LINE	L1	L1Md_A	UID-1758	+	chr8	43005814	43012394	0.935	1574	41.13	6.319
LINE	L1	L1Md_A	UID-1828	-	chr8	68676747	68683740	0.836	814	41.091	5.598
LINE	L1	L1Md_A	UID-360	-	chr5	49748709	49755303	0.914	1305	41.052	5.818
LINE	L1	L1Md_A	UID-1722	-	chr2	36542821	36549402	0.837	1003	41.036	6.449
LINE	L1	L1Md_A	UID-1859	-	chr8	32575580	32581940	0.857	1122	41.021	6.109
LINE	L1	L1Md_A	UID-1381	+	chrX	126195848	126202224	0.893	868	40.994	5.859
LINE	L1	L1Md_A	UID-2456	-	chr7	91741650	91748425	0.901	1237	40.958	6.746
LINE	L1	L1Md_A	UID-495	-	chr16	45512592	45518978	0.848	2193	40.82	6.28
LINE	L1	L1Md_A	UID-419	+	chr16	53347816	53354352	0.832	1250	40.808	5.625
LINE	L1	L1Md_A	UID-2787	-	chrY	58361515	58368045	0.87	1124	40.799	6.318
LINE	L1	L1Md_A	UID-2556	+	chr12	67950152	67957141	0.878	1223	40.792	6.679
LINE	L1	L1Md_A	UID-2187	+	chr6	11832039	11839775	0.893	2494	40.737	6.923
LINE	L1	L1Md_A	UID-1497	-	chr4	110469567	110476144	0.891	1595	40.708	6.841
LINE	L1	L1Md_A	UID-2270	+	chr6	144975042	144981392	0.886	1369	40.611	6.297
LINE	L1	L1Md_A	UID-996	+	chr19	30605337	30611723	0.768	1754	40.607	5.869
LINE	L1	L1Md_A	UID-1041	-	chr13	68420828	68427403	0.826	1569	40.597	5.844
LINE	L1	L1Md_A	UID-1178	-	chrX	104266583	104273095	0.864	1096	40.573	6.03
LINE	L1	L1Md_A	UID-1318	+	chrX	64489166	64495942	0.843	2804	40.569	6.231
LINE	L1	L1Md_A	UID-2111	-	chr6	102035076	102041860	0.865	996	40.489	6.318
LINE	L1	L1Md_A	UID-300	+	chr5	145481280	145488070	0.873	1304	40.481	5.867
LINE	L1	L1Md_A	UID-335	-	chr5	81571604	81577832	0.749	2524	40.406	5.893
LINE	L1	L1Md_A	UID-1465	+	chr4	87614367	87620773	0.838	937	40.31	6.193
LINE	L1	L1Md_A	UID-2710	+	chr10	6654610	6661139	0.874	973	40.309	6.417
LINE	L1	L1Md_A	UID-491	-	chr16	51503347	51509516	0.9	1489	40.274	6.409
LINE	L1	L1Md_A	UID-1570	-	chr4	9921893	9928474	0.873	1186	40.224	6.758
LINE	L1	L1Md_A	UID-1190	-	chrX	90665199	90671964	0.772	752	40.18	5.232
LINE	L1	L1Md_A	UID-1670	-	chr2	107100880	107107360	0.881	887	40.179	6.516
LINE	L1	L1Md_A	UID-2788	-	chrY	34021078	34027400	0.833	1181	40.159	6.39
LINE	L1	L1Md_A	UID-838	-	chr15	44861058	44867841	0.864	2009	40.149	6.514
LINE	L1	L1Md_A	UID-2525	+	chr12	30820541	30826912	0.834	1040	40.138	5.632
LINE	L1	L1Md_A	UID-2159	-	chr6	28645577	28652135	0.915	1284	40.12	6.667
LINE	L1	L1Md_A	UID-1552	-	chr4	23851587	23857987	0.879	1220	40.116	6.054
LINE	L1	L1Md_A	UID-1293	+	chrX	44386965	44393551	0.802	1113	40.102	5.671
LINE	L1	L1Md_A	UID-1463	+	chr4	83065751	83073168	0.917	1702	40.097	6.973
LINE	L1	L1Md_A	UID-283	+	chr5	91416969	91423964	0.876	1435	40.047	6.782
LINE	L1	L1Md_A	UID-1922	+	chr14	102143263	102150047	0.877	1701	40.014	6.225
LINE	L1	L1Md_A	UID-1918	+	chr14	87354530	87360898	0.878	2406	40	6.053
LINE	L1	L1Md_A	UID-1853	-	chr8	41724219	41730577	0.838	1092	39.96	5.519
LINE	L1	L1Md_A	UID-2578	-	chr12	114235100	114241885	0.858	1898	39.901	6.048
LINE	L1	L1Md_A	UID-405	+	chr16	29423886	29430235	0.835	934	39.876	5.582
LINE	L1	L1Md_A	UID-2041	+	chr17	59044889	59052343	0.832	792	39.874	5.348
LINE	L1	L1Md_A	UID-1211	-	chrX	72079341	72086125	0.878	1295	39.845	7.153
LINE	L1	L1Md_A	UID-800	-	chr3	10961723	10968533	0.882	2046	39.826	6.282
LINE	L1	L1Md_A	UID-1676	-	chr2	95254285	95261106	0.857	1256	39.794	6.628
LINE	L1	L1Md_A	UID-1675	-	chr2	95254285	95261106	0.857	1256	39.794	6.628
LINE	L1	L1Md_A	UID-2475	-	chr7	60676274	60682856	0.851	1401	39.781	6.539
LINE	L1	L1Md_A	UID-64	+	chr1	84700607	84707183	0.878	1589	39.751	6.834
LINE	L1	L1Md_A	UID-1865	-	chr8	28613827	28619986	0.854	1230	39.715	6.044
LINE	L1	L1Md_A	UID-1262	-	chrX	9503142	9509742	0.803	967	39.708	5.707
LINE	L1	L1Md_A	UID-2684	-	chr10	47663574	47669952	0.878	1167	39.683	5.998
LINE	L1	L1Md_A	UID-1319	+	chrX	65406599	65413383	0.89	1211	39.6	6.037
LINE	L1	L1Md_A	UID-2119	-	chr6	79516802	79523378	0.87	1687	39.573	6.173
LINE	L1	L1Md_A	UID-1564	-	chr4	15014235	15020583	0.847	2309	39.559	6.269
LINE	L1	L1Md_A	UID-938	+	chr11	66706191	66712406	0.739	1609	39.559	5.386
LINE	L1	L1Md_A	UID-1067	-	chr13	6722482	6729063	0.786	2675	39.541	5.982
LINE	L1	L1Md_A	UID-1186	-	chrX	95412438	95418783	0.905	1569	39.505	6.565
LINE	L1	L1Md_A	UID-771	-	chr3	52910875	52918473	0.867	1506	39.504	6.517
LINE	L1	L1Md_A	UID-1343	+	chrX	81982173	81988755	0.883	1564	39.5	6.436
LINE	L1	L1Md_A	UID-1699	-	chr2	62194047	62200609	0.881	1598	39.498	5.947
LINE	L1	L1Md_A	UID-1996	-	chr14	37778541	37784700	0.909	1338	39.493	5.93
LINE	L1	L1Md_A	UID-687	+	chr3	117285567	117292451	0.798	654	39.489	5.856
LINE	L1	L1Md_A	UID-1938	+	chr14	124425268	124431632	0.862	993	39.425	5.775
LINE	L1	L1Md_A	UID-2184	+	chr6	7333000	7339783	0.852	950	39.4	6.434
LINE	L1	L1Md_A	UID-668	+	chr3	75779650	75786004	0.876	2214	39.343	6.779
LINE	L1	L1Md_A	UID-900	+	chr15	72429145	72435539	0.892	1348	39.324	6.708
LINE	L1	L1Md_A	UID-1125	+	chr13	119187946	119194941	0.843	1125	39.275	6.318
LINE	L1	L1Md_A	UID-2142	-	chr6	58424800	58431567	0.859	987	39.19	6.748
LINE	L1	L1Md_A	UID-62	+	chr1	84263510	84270716	0.876	2539	39.148	6.636
LINE	L1	L1Md_A	UID-178	-	chr1	92412223	92418566	0.854	1047	39.14	5.052
LINE	L1	L1Md_A	UID-990	+	chr19	18226624	18232826	0.841	1888	39.104	5.937
LINE	L1	L1Md_A	UID-727	-	chr3	124160542	124166701	0.851	1912	39.041	6.488
LINE	L1	L1Md_A	UID-2686	-	chr10	45687968	45694128	0.848	935	38.993	5.895
LINE	L1	L1Md_A	UID-1798	+	chr8	99860049	99866429	0.863	1684	38.988	6.2
LINE	L1	L1Md_A	UID-560	+	chr18	89136299	89143333	0.841	1263	38.974	4.971
LINE	L1	L1Md_A	UID-2467	-	chr7	71977977	71984522	0.862	1892	38.962	6.287
LINE	L1	L1Md_A	UID-606	+	chr3	4190068	4196644	0.875	1422	38.922	6.173
LINE	L1	L1Md_A	UID-1298	+	chrX	47789519	47795916	0.772	1737	38.914	5.63
LINE	L1	L1Md_A	UID-133	-	chr1	164723806	164730175	0.835	1270	38.833	6.542
LINE	L1	L1Md_A	UID-1553	-	chr4	23201170	23207727	0.855	777	38.8	6.213
LINE	L1	L1Md_A	UID-669	+	chr3	78451237	78457606	0.887	2782	38.748	5.964
LINE	L1	L1Md_A	UID-1750	+	chr8	37664705	37670916	0.84	1311	38.748	5.634
LINE	L1	L1Md_A	UID-2267	+	chr6	138024077	138030708	0.86	1229	38.736	5.478
LINE	L1	L1Md_A	UID-50	+	chr1	68268128	68274463	0.886	2549	38.72	5.705
LINE	L1	L1Md_A	UID-1171	-	chrX	111718312	111724514	0.763	1188	38.676	5.407
LINE	L1	L1Md_A	UID-1646	-	chr2	178442265	178449053	0.845	924	38.666	5.142
LINE	L1	L1Md_A	UID-113	+	chr1	172731827	172738195	0.872	1006	38.665	5.849
LINE	L1	L1Md_A	UID-2736	+	chr10	37935288	37941638	0.783	842	38.616	5.239
LINE	L1	L1Md_A	UID-2394	+	chr7	58057196	58064194	0.837	996	38.586	5.733
LINE	L1	L1Md_A	UID-2637	-	chr12	11953770	11960139	0.837	1247	38.439	5.76
LINE	L1	L1Md_A	UID-1416	+	chr4	9585466	9592704	0.765	1694	38.395	5.752
LINE	L1	L1Md_A	UID-867	+	chr15	19678007	19685829	0.872	1873	38.316	6.452
LINE	L1	L1Md_A	UID-1173	-	chrX	109824909	109831455	0.855	761	38.299	6.146
LINE	L1	L1Md_A	UID-1701	-	chr2	56940469	56946880	0.799	920	38.282	5.49
LINE	L1	L1Md_A	UID-470	-	chr16	71550013	71556391	0.857	1588	38.271	5.473
LINE	L1	L1Md_A	UID-1286	+	chrX	39933629	39940201	0.907	1627	38.259	5.98
LINE	L1	L1Md_A	UID-2660	-	chr10	92909112	92915484	0.931	1402	38.255	6.13
LINE	L1	L1Md_A	UID-2510	+	chr12	7111628	7118203	0.835	1295	38.238	6.231
LINE	L1	L1Md_A	UID-1109	+	chr13	85672230	85678781	0.845	718	38.232	5.481
LINE	L1	L1Md_A	UID-2653	-	chr10	99718953	99725386	0.847	1119	38.19	5.236
LINE	L1	L1Md_A	UID-2015	-	chr14	4091749	4098129	0.84	1166	38.124	6.068
LINE	L1	L1Md_A	UID-1020	-	chr13	109761983	109768590	0.817	924	38.114	5.354
LINE	L1	L1Md_A	UID-2422	+	chr7	87511891	87518095	0.819	972	38.087	5.68
LINE	L1	L1Md_A	UID-2709	+	chr10	5388669	5395456	0.891	1699	38.028	6.588
LINE	L1	L1Md_A	UID-1799	+	chr8	101208348	101215114	0.823	999	38.018	6.087
LINE	L1	L1Md_A	UID-641	+	chr3	49822822	49829189	0.837	1128	37.991	5.68
LINE	L1	L1Md_A	UID-203	-	chr1	44368842	44375632	0.861	1258	37.917	5.98
LINE	L1	L1Md_A	UID-1162	-	chrX	123368668	123375011	0.805	793	37.895	5.363
LINE	L1	L1Md_A	UID-1209	-	chrX	72122763	72128867	0.85	1464	37.873	6.439
LINE	L1	L1Md_A	UID-44	+	chr1	61209558	61215926	0.893	1150	37.839	6.34
LINE	L1	L1Md_A	UID-1583	+	chr2	22076740	22083298	0.847	1052	37.824	6.188
LINE	L1	L1Md_A	UID-782	-	chr3	32161977	32168588	0.838	1207	37.788	5.52
LINE	L1	L1Md_A	UID-1548	-	chr4	31892589	31898746	0.791	2708	37.778	5.79
LINE	L1	L1Md_A	UID-522	+	chr18	25213815	25220001	0.777	2357	37.774	6.297
LINE	L1	L1Md_A	UID-523	+	chr18	25213815	25220001	0.777	2357	37.774	6.297
LINE	L1	L1Md_A	UID-775	-	chr3	47401432	47407621	0.874	1809	37.743	5.861
LINE	L1	L1Md_A	UID-2756	+	chr10	79442485	79449271	0.862	1289	37.72	6.65
LINE	L1	L1Md_A	UID-466	-	chr16	74357397	74363602	0.855	1820	37.614	5.894
LINE	L1	L1Md_A	UID-2152	-	chr6	41801167	41807971	0.835	1158	37.46	5.38
LINE	L1	L1Md_A	UID-2004	-	chr14	28604374	28610592	0.912	1175	37.451	6.638
LINE	L1	L1Md_A	UID-1400	+	chrX	156370653	156376864	0.912	1115	37.422	6.11
LINE	L1	L1Md_A	UID-1598	+	chr2	58256779	58263142	0.883	1139	37.275	5.771
LINE	L1	L1Md_A	UID-487	-	chr16	54517881	54524667	0.845	842	37.264	5.075
LINE	L1	L1Md_A	UID-321	-	chr5	94048883	94056290	0.86	927	37.122	5.893
LINE	L1	L1Md_A	UID-954	-	chr11	58468956	58475506	0.805	1283	37.114	4.522
LINE	L1	L1Md_A	UID-498	-	chr16	42773164	42779725	0.822	594	37.054	5.583
LINE	L1	L1Md_A	UID-1667	-	chr2	108327331	108334135	0.812	1685	37.054	5.487
LINE	L1	L1Md_A	UID-2037	+	chr17	54257969	54263997	0.895	1304	37.049	5.879
LINE	L1	L1Md_A	UID-136	-	chr1	148877937	148884314	0.876	1304	37.026	5.635
LINE	L1	L1Md_A	UID-868	+	chr15	20349147	20355707	0.816	966	36.994	4.899
LINE	L1	L1Md_A	UID-890	+	chr15	54037547	54043904	0.898	1407	36.988	5.968
LINE	L1	L1Md_A	UID-397	+	chr16	19711398	19717786	0.812	884	36.904	5.086
LINE	L1	L1Md_A	UID-2789	-	chrY	32116875	32123615	0.89	1227	36.894	5.984
LINE	L1	L1Md_A	UID-2384	+	chr7	40231611	40237985	0.825	1739	36.838	5.016
LINE	L1	L1Md_A	UID-2675	-	chr10	56138132	56144328	0.858	1582	36.83	5.539
LINE	L1	L1Md_A	UID-1087	+	chr13	40626061	40632636	0.888	2187	36.71	6.102
LINE	L1	L1Md_A	UID-729	-	chr3	120921654	120928437	0.889	1050	36.688	6.505
LINE	L1	L1Md_A	UID-319	-	chr5	95714507	95721914	0.849	716	36.586	5.768
LINE	L1	L1Md_A	UID-186	-	chr1	70628945	70635563	0.839	1187	36.547	5.15
LINE	L1	L1Md_A	UID-1620	+	chr2	108552846	108559215	0.864	1249	36.524	6.251
LINE	L1	L1Md_A	UID-1855	-	chr8	39723894	39730269	0.816	635	36.462	5.264
LINE	L1	L1Md_A	UID-2537	+	chr12	42352304	42358507	0.8	1560	36.35	4.84
LINE	L1	L1Md_A	UID-766	-	chr3	59279873	59286881	0.835	3181	36.291	6.039
LINE	L1	L1Md_A	UID-1274	+	chrX	22129979	22136793	0.853	1639	36.254	5.13
LINE	L1	L1Md_A	UID-198	-	chr1	52887732	52894120	0.818	1221	36.17	5.942
LINE	L1	L1Md_A	UID-589	-	chr18	46004258	46010407	0.797	856	36.137	4.868
LINE	L1	L1Md_A	UID-504	-	chr16	14872734	14878914	0.836	966	36.113	5.045
LINE	L1	L1Md_A	UID-2204	+	chr6	27637644	27643966	0.864	1124	36.084	6.241
LINE	L1	L1Md_A	UID-1347	+	chrX	89422283	89428652	0.85	1125	36.007	5.392
LINE	L1	L1Md_A	UID-1573	-	chr4	5000575	5006893	0.888	875	35.894	5.825
LINE	L1	L1Md_A	UID-780	-	chr3	36847219	36853638	0.813	734	35.89	4.648
LINE	L1	L1Md_A	UID-92	+	chr1	143380520	143386886	0.863	1304	35.834	5.967
LINE	L1	L1Md_A	UID-1047	-	chr13	50015175	50021714	0.914	1674	35.555	6.059
LINE	L1	L1Md_A	UID-1044	-	chr13	64582654	64589456	0.859	674	35.417	5.626
LINE	L1	L1Md_A	UID-1923	+	chr14	102844903	102851274	0.84	730	35.366	5.027
LINE	L1	L1Md_A	UID-2150	-	chr6	43799378	43805782	0.759	1232	35.324	5.871
LINE	L1	L1Md_A	UID-2584	-	chr12	96077695	96084318	0.824	1114	35.298	5.226
LINE	L1	L1Md_A	UID-952	-	chr11	64568019	64574228	0.798	715	35.245	5.523
LINE	L1	L1Md_A	UID-449	+	chr16	88104002	88110586	0.749	840	35.238	4.417
LINE	L1	L1Md_A	UID-2094	-	chr6	137227661	137234090	0.865	1345	35.183	5.449
LINE	L1	L1Md_A	UID-622	+	chr3	17293799	17300030	0.849	1114	34.876	5.028
LINE	L1	L1Md_A	UID-1019	-	chr19	7674702	7681090	0.748	1178	34.841	5.344
LINE	L1	L1Md_A	UID-776	-	chr3	44241210	44247976	0.873	1550	34.789	5.773
LINE	L1	L1Md_A	UID-2280	+	chr9	18235088	18241473	0.859	1380	34.7	5.642
LINE	L1	L1Md_A	UID-224	+	chr5	8258754	8265366	0.826	1710	34.603	5.43
LINE	L1	L1Md_A	UID-991	+	chr19	19508824	19514962	0.741	1146	34.602	4.937
LINE	L1	L1Md_A	UID-1427	+	chr4	18221621	18228040	0.746	1101	34.522	5.366
LINE	L1	L1Md_A	UID-254	+	chr5	58924946	58932145	0.823	549	34.5	6.035
LINE	L1	L1Md_A	UID-1513	-	chr4	90650797	90658004	0.706	1531	34.265	4.847
LINE	L1	L1Md_A	UID-1487	+	chr4	144172085	144178331	0.758	1252	34.233	4.78
LINE	L1	L1Md_A	UID-2360	-	chr9	18791007	18797175	0.817	739	34.051	4.877
LINE	L1	L1Md_A	UID-1805	-	chr8	112645337	112651943	0.766	837	33.959	4.584
LINE	L1	L1Md_A	UID-989	+	chr19	1.40E+07	14006223	0.844	1086	33.955	4.148
LINE	L1	L1Md_A	UID-2800	+	chrY	752311	758722	0.87	862	33.75	4.989
LINE	L1	L1Md_A	UID-2522	+	chr12	28191321	28197716	0.794	1301	33.729	5.266
LINE	L1	L1Md_A	UID-1563	-	chr4	16303007	16310199	0.782	802	33.655	4.417
LINE	L1	L1Md_A	UID-343	-	chr5	69911545	69917750	0.83	951	33.601	4.774
LINE	L1	L1Md_A	UID-2585	-	chr12	96000316	96007291	0.757	1179	33.587	5.24
LINE	L1	L1Md_A	UID-1093	+	chr13	61422038	61428870	0.747	997	33.433	4.433
LINE	L1	L1Md_A	UID-1550	-	chr4	26562428	26568780	0.824	777	33.3	5.137
LINE	L1	L1Md_A	UID-2739	+	chr10	47221376	47227766	0.782	653	33.263	5.095
LINE	L1	L1Md_A	UID-2162	-	chr6	25070501	25076917	0.759	805	33.243	4.896
LINE	L1	L1Md_A	UID-2085	-	chr17	17680649	17687036	0.773	1664	33.232	5.323
LINE	L1	L1Md_A	UID-1632	+	chr2	147918785	147924994	0.9	1106	33.222	5.472
LINE	L1	L1Md_A	UID-658	+	chr3	65755819	65762189	0.78	1563	33.182	4.869
LINE	L1	L1Md_A	UID-118	+	chr1	194080382	194086594	0.743	995	33.126	4.609
LINE	L1	L1Md_A	UID-1384	+	chrX	130696047	130702209	0.86	1575	33.076	4.849
LINE	L1	L1Md_A	UID-718	-	chr3	147356280	147362435	0.751	837	32.974	4.646
LINE	L1	L1Md_A	UID-431	+	chr16	70817561	70824360	0.667	673	32.887	4.716
LINE	L1	L1Md_A	UID-2107	-	chr6	107284254	107290449	0.801	1624	32.778	5.117
LINE	L1	L1Md_A	UID-2317	+	chr9	122297345	122303543	0.769	856	32.775	4.577
LINE	L1	L1Md_A	UID-2778	+	chr10	110846882	110853887	0.865	1858	32.662	5.315
LINE	L1	L1Md_A	UID-2356	-	chr9	27464930	27471158	0.775	1029	32.654	5.385
LINE	L1	L1Md_A	UID-2	+	chr1	5819993	5826594	0.772	757	32.578	5.36
LINE	L1	L1Md_A	UID-1903	+	chr14	46211510	46218295	0.903	1622	32.563	4.866
LINE	L1	L1Md_A	UID-1582	+	chr2	21246463	21252846	0.747	759	32.509	5.158
LINE	L1	L1Md_A	UID-2292	+	chr9	52992560	52998928	0.808	1132	32.462	3.99
LINE	L1	L1Md_A	UID-1503	-	chr4	100650032	100656800	0.759	827	32.423	4.271
LINE	L1	L1Md_A	UID-1594	+	chr2	55026460	55033037	0.721	634	32.417	4.892
LINE	L1	L1Md_A	UID-1133	-	chrX	160534644	160540828	0.799	1221	32.34	5.139
LINE	L1	L1Md_A	UID-49	+	chr1	67587423	67593582	0.853	1408	32.332	4.449
LINE	L1	L1Md_A	UID-2186	+	chr6	10240577	10246929	0.795	856	32.302	4.785
LINE	L1	L1Md_A	UID-112	+	chr1	172716694	172723095	0.748	897	32.233	4.551
LINE	L1	L1Md_A	UID-2259	+	chr6	111462694	111469275	0.858	1202	32.119	5.746
LINE	L1	L1Md_A	UID-1363	+	chrX	104638959	104645362	0.785	864	31.876	4.654
LINE	L1	L1Md_A	UID-773	-	chr3	50540921	50547100	0.796	1101	31.747	5.104
LINE	L1	L1Md_A	UID-2352	-	chr9	36485543	36491728	0.711	866	31.556	3.726
LINE	L1	L1Md_A	UID-2045	+	chr17	68528868	68535248	0.794	1569	31.469	5.461
LINE	L1	L1Md_A	UID-43	+	chr1	60687820	60694025	0.752	666	31.428	4.813
LINE	L1	L1Md_A	UID-1525	-	chr4	75348754	75355729	0.859	937	31.329	4.861
LINE	L1	L1Md_A	UID-2792	-	chrY	28749869	28756097	0.651	622	31.163	4.671
LINE	L1	L1Md_A	UID-358	-	chr5	50848960	50855536	0.853	868	31.1	4.783
LINE	L1	L1Md_A	UID-722	-	chr3	136510751	136516947	0.749	649	31.054	4.854
LINE	L1	L1Md_A	UID-2586	-	chr12	95611409	95618210	0.786	1679	30.926	4.77
LINE	L1	L1Md_A	UID-2534	+	chr12	39899527	39906077	0.752	623	30.921	4.66
LINE	L1	L1Md_A	UID-2020	+	chr17	9490057	9496382	0.745	1636	30.882	5.308
LINE	L1	L1Md_A	UID-706	+	chr3	141378679	141385089	0.767	592	30.85	4.509
LINE	L1	L1Md_A	UID-1059	-	chr13	22543189	22550181	0.831	992	30.811	5.476
LINE	L1	L1Md_A	UID-813	-	chr15	87143190	87149384	0.77	966	30.381	4.853
LINE	L1	L1Md_A	UID-1609	+	chr2	83373496	83379861	0.826	1070	30.307	4.793
LINE	L1	L1Md_A	UID-444	+	chr16	83317687	83323890	0.753	662	30.26	4.937
LINE	L1	L1Md_A	UID-173	-	chr1	100314296	100320733	0.755	725	30.18	3.964
LINE	L1	L1Md_A	UID-306	-	chr5	127271557	127278124	0.795	1081	30.135	4.417
LINE	L1	L1Md_A	UID-1429	+	chr4	19072727	19079083	0.859	1093	30.059	5.139
LINE	L1	L1Md_A	UID-2237	+	chr6	78484712	78491690	0.816	872	29.799	5.152
LINE	L1	L1Md_A	UID-2057	+	chr17	94574543	94580926	0.778	1304	29.722	4.336
LINE	L1	L1Md_A	UID-174	-	chr1	99817949	99824307	0.749	776	29.476	4.236
LINE	L1	L1Md_A	UID-48	+	chr1	63859130	63865526	0.733	1441	28.97	4.389
LINE	L1	L1Md_A	UID-2260	+	chr6	112067393	112073804	0.747	591	28.916	4.788
LINE	L1	L1Md_A	UID-2782	+	chr10	115535822	115542240	0.817	949	28.793	4.298
LINE	L1	L1Md_A	UID-604	-	chr18	11177244	11183284	0.647	690	28.788	4.053
LINE	L1	L1Md_A	UID-1615	+	chr2	97838299	97844673	0.819	687	28.448	4.862
LINE	L1	L1Md_A	UID-1825	-	chr8	75140017	75146721	0.755	1031	28.243	4.689
LINE	L1	L1Md_A	UID-1422	+	chr4	16319793	16325983	0.747	789	28.233	3.844
LINE	L1	L1Md_A	UID-2444	-	chr7	116757119	116763530	0.746	784	27.303	4.373
LINE	L1	L1Md_A	UID-1998	-	chr14	36539425	36545835	0.833	666	27.196	4.211
LINE	L1	L1Md_A	UID-2706	-	chr10	4831533	4837930	0.727	716	26.982	4.231
LINE	L1	L1Md_A	UID-1878	-	chr8	4373794	4380397	0.753	863	26.922	4.645
LINE	L1	L1Md_A	UID-1312	+	chrX	59787393	59794700	0.871	2393	26.882	5.069
LINE	L1	L1Md_A	UID-1313	+	chrX	59787393	59794700	0.871	2393	26.882	5.069
LINE	L1	L1Md_A	UID-543	+	chr18	57214376	57220493	0.715	668	26.793	3.171
LINE	L1	L1Md_A	UID-958	-	chr11	55831326	55837523	0.756	714	26.707	3.74
LINE	L1	L1Md_A	UID-2361	-	chr9	17850077	17856684	0.67	836	26.7	4.189
LINE	L1	L1Md_A	UID-1220	-	chrX	62865568	62871728	0.721	591	26.665	4.53
LINE	L1	L1Md_A	UID-2704	-	chr10	14483622	14489229	0.716	445	26.48	3.308
LINE	L1	L1Md_A	UID-1104	+	chr13	78050064	78056665	0.629	685	26.253	3.276
LINE	L1	L1Md_A	UID-287	+	chr5	95821341	95827927	0.575	842	26.16	3.338
LINE	L1	L1Md_A	UID-888	+	chr15	52125196	52131792	0.668	890	25.926	4.35
LINE	L1	L1Md_A	UID-2641	-	chr10	122152865	122159243	0.696	1573	25.851	4.751
LINE	L1	L1Md_A	UID-1659	-	chr2	122950371	122956790	0.765	509	25.658	3.968
LINE	L1	L1Md_A	UID-1857	-	chr8	35500000	35505852	0.734	716	25.534	3.897
LINE	L1	L1Md_A	UID-611	+	chr3	6738397	6744790	0.706	613	25.33	3.888
LINE	L1	L1Md_A	UID-325	-	chr5	91055518	91061910	0.674	1199	24.892	3.844
LINE	L1	L1Md_A	UID-792	-	chr3	22669685	22676078	0.746	792	24.774	3.233
LINE	L1	L1Md_A	UID-1032	-	chr13	85323461	85330068	0.722	1052	24.473	4.092
LINE	L1	L1Md_A	UID-1874	-	chr8	17637528	17643918	0.669	499	23.954	4.16
LINE	L1	L1Md_A	UID-1875	-	chr8	16041763	16047937	0.758	757	23.948	3.976
LINE	L1	L1Md_A	UID-1647	-	chr2	145236290	145242674	0.706	699	23.83	4.02
LINE	L1	L1Md_A	UID-1705	-	chr2	53503346	53509594	0.758	1831	22.94	4.065
LINE	L1	L1Md_A	UID-787	-	chr3	28991241	28997425	0.616	399	22.854	3.076
LINE	L1	L1Md_A	UID-1034	-	chr13	83180724	83187329	0.701	852	22.681	3.604
LINE	L1	L1Md_A	UID-1821	-	chr8	85343614	85349800	0.739	987	22.658	4.122
LINE	L1	L1Md_A	UID-538	+	chr18	49669323	49675489	0.804	631	22.457	4.378
LINE	L1	L1Md_A	UID-263	+	chr5	64544855	64551187	0.7	794	22.227	3.31
LINE	L1	L1Md_A	UID-1621	+	chr2	110104596	110110808	0.661	1409	22.218	4.177
LINE	L1	L1Md_A	UID-375	-	chr5	27224778	27231426	0.676	924	21.962	3.918
LINE	L1	L1Md_A	UID-2032	+	chr17	40464216	40470418	0.687	1322	20.812	3.82
LINE	L1	L1Md_A	UID-1358	+	chrX	97940799	97947383	0.551	789	20.256	3.013
LINE	L1	L1Md_A	UID-836	-	chr15	46154733	46160937	0.719	579	19.886	3.66
LINE	L1	L1Md_A	UID-380	-	chr5	18536703	18542885	0.619	729	19.515	3.438
LINE	L1	L1Md_A	UID-2079	-	chr17	52472271	52478867	0.678	722	19.406	3.717
LINE	L1	L1Md_A	UID-1686	-	chr2	83886939	83893223	0.567	562	18.72	2.33
LINE	L1	L1Md_A	UID-1935	+	chr14	120777433	120784039	0.73	618	18.71	3.142
LINE	L1	L1Md_A	UID-2629	-	chr12	22137898	22144070	0.649	510	17.785	2.386
LINE	L1	L1Md_A	UID-931	+	chr11	49343083	49349480	0.694	744	17.733	3.21
LINE	L1	L1Md_A	UID-1039	-	chr13	74683970	74690155	0.711	1057	16.647	2.443
LINE	L1	L1Md_A	UID-2126	-	chr6	69487766	69494147	0.653	761	14.349	2.188
LINE	L1	L1Md_A	UID-1761	+	chr8	44856379	44862375	0.635	801	13.398	2.485
LINE	L1	L1Md_A	UID-291	+	chr5	106935595	106941613	0.541	829	13.169	1.835
LINE	L1	L1Md_A	UID-1616	+	chr2	100765875	100772936	0.855	1025	12.996	2.464
LINE	L1	L1Md_A	UID-385	-	chr5	14546492	14552749	0.641	416	6.685	2.296
LINE	L1	L1Md_A	UID-2503	-	chr7	12069869	12076054	0.61	677	5.651	1.463
LINE	L1	L1Md_A	UID-1869	-	chr8	24798114	24804261	0.382	228	3.014	0.639
LINE	L1	L1Md_F	UID-924	+	chr11	41889499	41896038	0.819	1039	12.777	2.324
LINE	L1	L1Md_F2	UID-2379	+	chr7	20156436	20163122	0.821	1060	46.189	6.892
LINE	L1	L1Md_F2	UID-2381	+	chr7	22152093	22158780	0.817	1220	44.892	6.53
LINE	L1	L1Md_F2	UID-260	+	chr5	62209296	62216403	0.809	1557	41.849	7.239
LINE	L1	L1Md_F2	UID-875	+	chr15	33560226	33566356	0.916	1095	40.128	6.87
LINE	L1	L1Md_F2	UID-1273	+	chrX	21865108	21872509	0.781	2173	39.631	6.593	Fig. 6
LINE	L1	L1Md_F2	UID-1397	+	chrX	154500813	154507751	0.719	488	32.519	4.76
LINE	L1	L1Md_F2	UID-509	+	chr18	4222493	4228835	0.788	568	25.799	4.496
LINE	L1	L1Md_F2	UID-1037	-	chr13	77945220	77951649	0.439	530	10.849	1.827
LINE	L1	L1Md_Gf	UID-2720	+	chr10	15634814	15641827	0.91	2880	42.948	7.318	Fig. 6
LINE	L1	L1Md_Gf	UID-1126	+	chr13	120290293	120296933	0.918	1397	41.421	7.231
LINE	L1	L1Md_Gf	UID-664	+	chr3	70718610	70725070	0.928	2172	40.619	6.927
LINE	L1	L1Md_Gf	UID-1415	+	chr4	8191747	8197979	0.919	2639	40.498	6.905
LINE	L1	L1Md_Gf	UID-2408	+	chr7	70193245	70200069	0.872	2346	39.255	6.643
LINE	L1	L1Md_Gf	UID-2566	+	chr12	95822045	95829349	0.894	1028	37.358	6.702
LINE	L1	L1Md_Gf	UID-1315	+	chrX	62840634	62847249	0.893	1697	35.761	6.22
LINE	L1	L1Md_Gf	UID-66	+	chr1	98366439	98373085	0.899	1647	34.549	5.87
LINE	L1	L1Md_Gf	UID-2248	+	chr6	96921929	96928331	0.747	993	18.122	3.765
LINE	L1	L1Md_T	UID-1976	-	chr14	71784597	71792093	0.891	1031	54.362	8.008
LINE	L1	L1Md_T	UID-1929	+	chr14	113974881	113981252	0.893	1160	53.841	7.64
LINE	L1	L1Md_T	UID-2552	+	chr12	64725989	64732987	0.843	1388	52.395	7.797
LINE	L1	L1Md_T	UID-932	+	chr11	56203815	56211298	0.925	2673	47.225	7.896
LINE	L1	L1Md_T	UID-2310	+	chr9	98250054	98257753	0.927	1461	46.599	7.809
LINE	L1	L1Md_T	UID-531	+	chr18	33044079	33050527	0.891	1850	45.864	7.425
LINE	L1	L1Md_T	UID-460	-	chr16	84935794	84943053	0.931	2329	45.706	7.876
LINE	L1	L1Md_T	UID-234	+	chr5	22456289	22462871	0.792	1448	45.585	5.993
LINE	L1	L1Md_T	UID-2532	+	chr12	38047611	38054883	0.92	3885	45.292	7.928	Fig. 6
LINE	L1	L1Md_T	UID-1299	+	chrX	47866375	47873659	0.893	2566	45.022	7.894
LINE	L1	L1Md_T	UID-1677	-	chr2	95217519	95223902	0.765	852	44.935	6.717
LINE	L1	L1Md_T	UID-2374	+	chr7	14086327	14094456	0.89	1377	44.417	7.958
LINE	L1	L1Md_T	UID-769	-	chr3	55602809	55610310	0.908	2354	44.388	7.917
LINE	L1	L1Md_T	UID-1075	+	chr13	16500000	16506876	0.92	1912	44.356	7.446
LINE	L1	L1Md_T	UID-1433	+	chr4	21650293	21657540	0.898	1592	44.328	7.197
LINE	L1	L1Md_T	UID-1169	-	chrX	114260686	114268026	0.902	1387	44.317	7.523
LINE	L1	L1Md_T	UID-110	+	chr1	165526614	165533883	0.919	2133	44.304	7.705
LINE	L1	L1Md_T	UID-2246	+	chr6	96595457	96602885	0.878	2914	44.2	7.811
LINE	L1	L1Md_T	UID-728	-	chr3	123927129	123934198	0.901	1225	44.191	7.844
LINE	L1	L1Md_T	UID-730	-	chr3	120735038	120742501	0.906	1435	44.161	7.947
LINE	L1	L1Md_T	UID-544	+	chr18	59729986	59737677	0.877	1720	43.947	7.529
LINE	L1	L1Md_T	UID-2083	-	chr17	21544689	21551712	0.894	1469	43.943	7.72
LINE	L1	L1Md_T	UID-1296	+	chrX	46977506	46983852	0.91	2964	43.912	7.415
LINE	L1	L1Md_T	UID-2784	+	chr10	122234930	122241794	0.916	2354	43.834	7.699
LINE	L1	L1Md_T	UID-1111	+	chr13	87569456	87576533	0.925	2682	43.741	7.788
LINE	L1	L1Md_T	UID-2538	+	chr12	43036640	43043903	0.907	2631	43.741	7.691
LINE	L1	L1Md_T	UID-510	+	chr18	5751052	5758346	0.91	2878	43.632	7.84
LINE	L1	L1Md_T	UID-2170	-	chr6	18579736	18587454	0.912	1417	43.62	7.789
LINE	L1	L1Md_T	UID-1474	+	chr4	94891169	94898167	0.896	1636	43.603	7.277
LINE	L1	L1Md_T	UID-2663	-	chr10	78803506	78810357	0.891	2013	43.587	7.666
LINE	L1	L1Md_T	UID-639	+	chr3	45578217	45585547	0.889	1729	43.562	7.354
LINE	L1	L1Md_T	UID-806	-	chr3	5049213	5055846	0.916	1469	43.538	7.558
LINE	L1	L1Md_T	UID-1663	-	chr2	110429053	110435899	0.912	1488	43.502	7.275
LINE	L1	L1Md_T	UID-2304	+	chr9	85898866	85905526	0.922	2460	43.478	7.432
LINE	L1	L1Md_T	UID-735	-	chr3	110107197	110113425	0.914	1396	43.475	7.346
LINE	L1	L1Md_T	UID-2472	-	chr7	66535361	66542187	0.919	1461	43.437	7.112
LINE	L1	L1Md_T	UID-587	-	chr18	47737218	47744383	0.889	1460	43.38	7.618
LINE	L1	L1Md_T	UID-2620	-	chr12	42739318	42746180	0.917	1568	43.368	7.637
LINE	L1	L1Md_T	UID-276	+	chr5	79848089	79854952	0.913	2618	43.326	7.567
LINE	L1	L1Md_T	UID-253	+	chr5	58777696	58784334	0.902	1661	43.281	7.543
LINE	L1	L1Md_T	UID-916	+	chr11	26426531	26433387	0.907	1977	43.272	7.612
LINE	L1	L1Md_T	UID-1499	-	chr4	105619133	105625790	0.9	1429	43.236	7.47
LINE	L1	L1Md_T	UID-38	+	chr1	52939509	52946392	0.915	1436	43.206	7.697
LINE	L1	L1Md_T	UID-1762	+	chr8	49573704	49580703	0.908	3049	43.195	6.861
LINE	L1	L1Md_T	UID-1354	+	chrX	96393193	96399414	0.917	1620	43.187	7.383
LINE	L1	L1Md_T	UID-926	+	chr11	45367785	45374632	0.902	2830	43.177	7.415
LINE	L1	L1Md_T	UID-975	-	chr11	23834745	23841180	0.907	1356	43.176	7.069
LINE	L1	L1Md_T	UID-631	+	chr3	39601980	39608615	0.905	2126	43.166	7.486
LINE	L1	L1Md_T	UID-2006	-	chr14	26698263	26705110	0.904	1165	43.146	7.42
LINE	L1	L1Md_T	UID-928	+	chr11	45769547	45777030	0.906	1311	43.137	7.615
LINE	L1	L1Md_T	UID-219	-	chr1	13730905	13737328	0.906	1593	43.116	7.578
LINE	L1	L1Md_T	UID-1515	-	chr4	88281223	88288079	0.902	1414	43.1	7.394
LINE	L1	L1Md_T	UID-823	-	chr15	60347698	60354351	0.886	1816	43.078	7.421
LINE	L1	L1Md_T	UID-1256	-	chrX	19186845	19193236	0.913	1356	43.02	6.993
LINE	L1	L1Md_T	UID-1579	+	chr2	15915024	15921602	0.929	3041	43.012	7.476
LINE	L1	L1Md_T	UID-1565	-	chr4	13425224	13432517	0.89	1559	43.011	7.75
LINE	L1	L1Md_T	UID-1491	-	chr4	143527719	143534339	0.911	1790	43.01	7.002
LINE	L1	L1Md_T	UID-2021	+	chr17	17554111	17561251	0.926	3280	43.003	7.489
LINE	L1	L1Md_T	UID-2749	+	chr10	63723514	63730445	0.9	2342	42.99	7.407
LINE	L1	L1Md_T	UID-857	-	chr15	15902248	15908688	0.914	1461	42.962	7.211
LINE	L1	L1Md_T	UID-359	-	chr5	50312147	50319258	0.855	1184	42.959	7.465
LINE	L1	L1Md_T	UID-1284	+	chrX	37909724	37916356	0.892	3027	42.957	7.373
LINE	L1	L1Md_T	UID-1393	+	chrX	151238302	151244879	0.908	2610	42.939	7.392
LINE	L1	L1Md_T	UID-839	-	chr15	44009816	44017125	0.906	1160	42.935	7.594
LINE	L1	L1Md_T	UID-1167	-	chrX	120674008	120680639	0.924	1316	42.924	7.448
LINE	L1	L1Md_T	UID-2588	-	chr12	93584469	93590896	0.94	1293	42.906	7.242
LINE	L1	L1Md_T	UID-1584	+	chr2	23939951	23946374	0.905	2067	42.893	7.417
LINE	L1	L1Md_T	UID-2474	-	chr7	63373495	63379921	0.922	1578	42.883	7.335
LINE	L1	L1Md_T	UID-415	+	chr16	48962835	48969461	0.891	2466	42.883	7.02
LINE	L1	L1Md_T	UID-1353	+	chrX	96379275	96385568	0.893	1563	42.878	7.173
LINE	L1	L1Md_T	UID-2345	-	chr9	55631750	55638325	0.885	1438	42.863	7.487
LINE	L1	L1Md_T	UID-677	+	chr3	94268384	94275053	0.92	2246	42.845	7.57
LINE	L1	L1Md_T	UID-1154	-	chrX	129904005	129910443	0.895	1414	42.839	7.382
LINE	L1	L1Md_T	UID-1578	+	chr2	13658017	13664864	0.918	1977	42.827	7.488
LINE	L1	L1Md_T	UID-860	-	chr15	4413947	4420788	0.903	2011	42.81	7.369
LINE	L1	L1Md_T	UID-1500	-	chr4	105292509	105299380	0.879	1457	42.797	7.344
LINE	L1	L1Md_T	UID-939	+	chr11	74306546	74313263	0.887	2717	42.784	7.329
LINE	L1	L1Md_T	UID-678	+	chr3	94549576	94556364	0.906	1641	42.78	7.503
LINE	L1	L1Md_T	UID-1461	+	chr4	80813017	80819251	0.918	2845	42.759	7.349
LINE	L1	L1Md_T	UID-566	-	chr18	87777059	87783333	0.903	1380	42.748	7.286
LINE	L1	L1Md_T	UID-919	+	chr11	34849941	34856171	0.908	2504	42.744	7.293
LINE	L1	L1Md_T	UID-2655	-	chr10	98544438	98551083	0.885	1771	42.734	7.626
LINE	L1	L1Md_T	UID-1237	-	chrX	48698984	48705635	0.897	1046	42.706	7.361
LINE	L1	L1Md_T	UID-1493	-	chr4	122706513	122713787	0.925	1423	42.685	7.87
LINE	L1	L1Md_T	UID-138	-	chr1	148515727	148522362	0.903	1447	42.678	7.513
LINE	L1	L1Md_T	UID-1845	-	chr8	57034287	57040919	0.907	1435	42.672	7.28
LINE	L1	L1Md_T	UID-2607	-	chr12	62541751	62549877	0.901	1160	42.667	7.197
LINE	L1	L1Md_T	UID-1866	-	chr8	28386633	28393265	0.89	1361	42.626	7.259
LINE	L1	L1Md_T	UID-2347	-	chr9	51564615	51571238	0.891	1487	42.601	7.278
LINE	L1	L1Md_T	UID-1225	-	chrX	60618410	60625043	0.923	1208	42.575	7.367
LINE	L1	L1Md_T	UID-1439	+	chr4	40596337	40603865	0.899	2465	42.568	7.56
LINE	L1	L1Md_T	UID-754	-	chr3	71058474	71065304	0.928	1669	42.554	7.124
LINE	L1	L1Md_T	UID-817	-	chr15	67265889	67272332	0.882	1435	42.553	7.387
LINE	L1	L1Md_T	UID-2118	-	chr6	84681608	84688224	0.894	1457	42.548	7.292
LINE	L1	L1Md_T	UID-1253	-	chrX	21403240	21409875	0.939	1435	42.526	7.244
LINE	L1	L1Md_T	UID-177	-	chr1	94722892	94729739	0.922	2005	42.524	7.67
LINE	L1	L1Md_T	UID-784	-	chr3	29866134	29872790	0.925	1804	42.512	7.081
LINE	L1	L1Md_T	UID-2546	+	chr12	61633012	61639643	0.879	1147	42.509	7.31
LINE	L1	L1Md_T	UID-2727	+	chr10	29619635	29626092	0.902	2465	42.507	7.378
LINE	L1	L1Md_T	UID-1960	-	chr14	100795148	100802198	0.911	2926	42.504	7.504
LINE	L1	L1Md_T	UID-2567	+	chr12	96510748	96517748	0.886	2220	42.445	7.315
LINE	L1	L1Md_T	UID-1189	-	chrX	90839012	90845675	0.915	1803	42.442	7.436
LINE	L1	L1Md_T	UID-2668	-	chr10	66462436	66469026	0.959	1749	42.434	6.918
LINE	L1	L1Md_T	UID-1078	+	chr13	22422972	22429861	0.874	2610	42.434	7.395
LINE	L1	L1Md_T	UID-103	+	chr1	158879567	158886266	0.935	2625	42.403	7.419
LINE	L1	L1Md_T	UID-1987	-	chr14	56188346	56195197	0.888	1436	42.401	7.285
LINE	L1	L1Md_T	UID-1356	+	chrX	97727906	97734774	0.881	3062	42.399	7.204
LINE	L1	L1Md_T	UID-1690	-	chr2	8.10E+07	81006094	0.914	1225	42.365	7.126
LINE	L1	L1Md_T	UID-521	+	chr18	22988995	22996478	0.848	2231	42.355	7.357
LINE	L1	L1Md_T	UID-1005	+	chr19	51899703	51906328	0.845	1619	42.331	7.222
LINE	L1	L1Md_T	UID-605	-	chr18	10875467	10882471	0.93	2153	42.328	6.99
LINE	L1	L1Md_T	UID-1330	+	chrX	75302880	75310145	0.895	2807	42.31	7.575
LINE	L1	L1Md_T	UID-1523	-	chr4	75924990	75931516	0.906	1604	42.308	7.199
LINE	L1	L1Md_T	UID-724	-	chr3	131945250	131951854	0.889	1052	42.292	7.259
LINE	L1	L1Md_T	UID-116	+	chr1	187062651	187069309	0.874	2247	42.29	7.217
LINE	L1	L1Md_T	UID-204	-	chr1	36951188	36957466	0.904	1377	42.289	7.388
LINE	L1	L1Md_T	UID-899	+	chr15	71650354	71657127	0.933	2552	42.279	6.969
LINE	L1	L1Md_T	UID-2614	-	chr12	49051141	49057971	0.922	1435	42.259	7.07
LINE	L1	L1Md_T	UID-714	-	chr3	155303692	155310278	0.893	1256	42.259	7.193
LINE	L1	L1Md_T	UID-1469	+	chr4	89792645	89799308	0.913	1673	42.254	7.234
LINE	L1	L1Md_T	UID-381	-	chr5	17238252	17247254	0.843	935	42.249	7.605
LINE	L1	L1Md_T	UID-47	+	chr1	62295396	62302308	0.888	2445	42.242	7.415
LINE	L1	L1Md_T	UID-492	-	chr16	48490644	48497999	0.931	1435	42.221	7.313
LINE	L1	L1Md_T	UID-20	+	chr1	29703425	29709848	0.915	2110	42.212	7.287
LINE	L1	L1Md_T	UID-699	+	chr3	130774310	130780733	0.907	1509	42.182	7.287
LINE	L1	L1Md_T	UID-2470	-	chr7	69428923	69435344	0.903	1564	42.18	7.12
LINE	L1	L1Md_T	UID-555	+	chr18	80505723	80511487	0.927	1586	42.174	6.739
LINE	L1	L1Md_T	UID-206	-	chr1	31694818	31701487	0.937	1626	42.17	7.277
LINE	L1	L1Md_T	UID-1224	-	chrX	61251843	61258918	0.898	1033	42.169	7.426
LINE	L1	L1Md_T	UID-2728	+	chr10	30216014	30223098	0.909	2429	42.166	7.051
LINE	L1	L1Md_T	UID-1027	-	chr13	101042717	101049388	0.89	1414	42.157	7.29
LINE	L1	L1Md_T	UID-2140	-	chr6	61917082	61923490	0.883	1369	42.143	7.327
LINE	L1	L1Md_T	UID-2609	-	chr12	61698951	61705608	0.851	1380	42.133	7.248
LINE	L1	L1Md_T	UID-1769	+	chr8	53113784	53119988	0.879	2243	42.13	7.258
LINE	L1	L1Md_T	UID-108	+	chr1	163783834	163790469	0.906	2369	42.127	7.276
LINE	L1	L1Md_T	UID-2628	-	chr12	23460341	23466792	0.897	1617	42.116	7.323
LINE	L1	L1Md_T	UID-2224	+	chr6	65318369	65324576	0.907	2718	42.114	7.196
LINE	L1	L1Md_T	UID-1807	-	chr8	103754918	103761341	0.906	1435	42.109	7.202
LINE	L1	L1Md_T	UID-703	+	chr3	134880937	134888423	0.884	945	42.109	7.139
LINE	L1	L1Md_T	UID-1679	-	chr2	90242721	90249164	0.883	1414	42.108	7.295
LINE	L1	L1Md_T	UID-277	+	chr5	81205126	81211586	0.878	2126	42.107	7.234
LINE	L1	L1Md_T	UID-1827	-	chr8	72838515	72845181	0.913	1838	42.101	7.224
LINE	L1	L1Md_T	UID-2485	-	chr7	50298870	50305241	0.916	1519	42.096	7.002
LINE	L1	L1Md_T	UID-666	+	chr3	73856630	73863200	0.737	1869	42.08	5.809
LINE	L1	L1Md_T	UID-207	-	chr1	30660617	30667036	0.907	1165	42.077	7.188
LINE	L1	L1Md_T	UID-2188	+	chr6	12522580	12528863	0.931	1878	42.069	7.202
LINE	L1	L1Md_T	UID-2729	+	chr10	31054881	31061514	0.921	2028	42.068	7.301
LINE	L1	L1Md_T	UID-124	-	chr1	186104171	186110565	0.879	1414	42.062	7.318
LINE	L1	L1Md_T	UID-1829	-	chr8	67776100	67782523	0.912	1290	42.058	7.069
LINE	L1	L1Md_T	UID-983	-	chr11	7920739	7927607	0.912	1240	42.054	7.383
LINE	L1	L1Md_T	UID-744	-	chr3	80349262	80355750	0.897	1240	42.054	7.245
LINE	L1	L1Md_T	UID-2575	-	chr12	118132093	118138331	0.918	1581	42.042	7.117
LINE	L1	L1Md_T	UID-1943	-	chr14	123426846	123434117	0.913	1469	42.042	7.432
LINE	L1	L1Md_T	UID-2078	-	chr17	52982597	52989023	0.907	1307	42.029	7.158
LINE	L1	L1Md_T	UID-2673	-	chr10	57326933	57333999	0.888	1276	42.028	7.131
LINE	L1	L1Md_T	UID-2418	+	chr7	82213354	82220228	0.895	1885	42.024	7.387
LINE	L1	L1Md_T	UID-2397	+	chr7	58421727	58428319	0.902	2060	42.023	7.346
LINE	L1	L1Md_T	UID-859	-	chr15	4769129	4775964	0.896	863	42.023	7.33
LINE	L1	L1Md_T	UID-825	-	chr15	58607331	58614007	0.884	1568	42.023	7.334
LINE	L1	L1Md_T	UID-1495	-	chr4	115344501	115351918	0.825	1335	42.023	7.171
LINE	L1	L1Md_T	UID-778	-	chr3	42318253	42325118	0.897	1461	41.999	7.103
LINE	L1	L1Md_T	UID-987	+	chr19	13770539	13777174	0.89	2082	41.995	7.304
LINE	L1	L1Md_T	UID-244	+	chr5	42188290	42195313	0.934	2632	41.983	7.546
LINE	L1	L1Md_T	UID-2387	+	chr7	51117394	51124894	0.925	2856	41.945	7.236
LINE	L1	L1Md_T	UID-270	+	chr5	71555961	71563272	0.837	2393	41.944	7.269
LINE	L1	L1Md_T	UID-299	+	chr5	133559846	133566502	0.922	2287	41.943	7.122
LINE	L1	L1Md_T	UID-2275	+	chr9	12739973	12746830	0.922	1467	41.935	7.32
LINE	L1	L1Md_T	UID-851	-	chr15	28252758	28259399	0.901	1484	41.913	7.314
LINE	L1	L1Md_T	UID-1195	-	chrX	86892157	86899464	0.802	1184	41.911	7.085
LINE	L1	L1Md_T	UID-2780	+	chr10	114535470	114542326	0.884	977	41.902	7.129
LINE	L1	L1Md_T	UID-117	+	chr1	187392736	187399964	0.93	1682	41.897	7.658
LINE	L1	L1Md_T	UID-2598	-	chr12	77547125	77553778	0.894	1222	41.886	6.999
LINE	L1	L1Md_T	UID-2357	-	chr9	26400496	26408410	0.9	862	41.877	7.545
LINE	L1	L1Md_T	UID-1814	-	chr8	98249596	98256019	0.904	1484	41.873	7.277
LINE	L1	L1Md_T	UID-1282	+	chrX	35822537	35829469	0.896	2874	41.847	7.244
LINE	L1	L1Md_T	UID-1973	-	chr14	74777010	74783285	0.933	1863	41.842	7.035
LINE	L1	L1Md_T	UID-1779	+	chr8	64890561	64896797	0.901	2035	41.829	7.097
LINE	L1	L1Md_T	UID-507	+	chr18	3031031	3037708	0.907	1619	41.828	7.117
LINE	L1	L1Md_T	UID-231	+	chr5	15781586	15787797	0.907	2819	41.816	7.123
LINE	L1	L1Md_T	UID-2277	+	chr9	16833652	16840305	0.908	2368	41.807	7.322
LINE	L1	L1Md_T	UID-165	-	chr1	106848865	106855498	0.904	1753	41.798	7.205
LINE	L1	L1Md_T	UID-1453	+	chr4	67916009	67922931	0.919	1218	41.794	7.165
LINE	L1	L1Md_T	UID-2554	+	chr12	65915220	65922065	0.918	2034	41.793	7.615
LINE	L1	L1Md_T	UID-1316	+	chrX	63945953	63952569	0.903	1633	41.781	6.979
LINE	L1	L1Md_T	UID-1079	+	chr13	24028331	24034918	0.88	2643	41.781	7.087
LINE	L1	L1Md_T	UID-2308	+	chr9	93434794	93442055	0.849	2231	41.776	7.038
LINE	L1	L1Md_T	UID-892	+	chr15	60398095	60404557	0.898	1877	41.773	7.221
LINE	L1	L1Md_T	UID-2362	-	chr9	14095136	14101998	0.876	1240	41.767	7.139
LINE	L1	L1Md_T	UID-556	+	chr18	85783586	85790044	0.859	2017	41.754	7.211
LINE	L1	L1Md_T	UID-2106	-	chr6	107670812	107677688	0.866	961	41.752	7.123
LINE	L1	L1Md_T	UID-314	-	chr5	102190780	102197435	0.913	3272	41.727	6.985
LINE	L1	L1Md_T	UID-2487	-	chr7	50054329	50060945	0.911	1352	41.724	7.14
LINE	L1	L1Md_T	UID-1128	-	chrX	164351210	164357845	0.913	1430	41.703	7.254
LINE	L1	L1Md_T	UID-2592	-	chr12	90962100	90968305	0.917	1435	41.689	7.158
LINE	L1	L1Md_T	UID-249	+	chr5	56189032	56195840	0.888	1888	41.685	7.255
LINE	L1	L1Md_T	UID-638	+	chr3	45348186	45354420	0.927	2846	41.679	6.987
LINE	L1	L1Md_T	UID-1413	+	chrX	169740691	169746925	0.843	1671	41.667	7.03
LINE	L1	L1Md_T	UID-2208	+	chr6	35446261	35452917	0.918	2511	41.659	7.104
LINE	L1	L1Md_T	UID-1660	-	chr2	116587170	116593804	0.91	1281	41.659	7.22
LINE	L1	L1Md_T	UID-2753	+	chr10	69196624	69203050	0.878	2074	41.654	7.129
LINE	L1	L1Md_T	UID-1531	-	chr4	64984588	64991029	0.931	1443	41.65	6.923
LINE	L1	L1Md_T	UID-2235	+	chr6	78026974	78033415	0.887	2317	41.645	7.282
LINE	L1	L1Md_T	UID-1630	+	chr2	141103180	141109774	0.923	2723	41.644	7.37
LINE	L1	L1Md_T	UID-2266	+	chr6	129856791	129863853	0.94	1785	41.64	7.167
LINE	L1	L1Md_T	UID-450	+	chr16	88527425	88534065	0.902	2641	41.633	7.351
LINE	L1	L1Md_T	UID-1440	+	chr4	43123382	43129627	0.903	1261	41.632	7.213
LINE	L1	L1Md_T	UID-680	+	chr3	102983536	102989932	0.875	1554	41.626	7.006
LINE	L1	L1Md_T	UID-2076	-	chr17	57368435	57374738	0.922	1465	41.619	6.94
LINE	L1	L1Md_T	UID-125	-	chr1	177929399	177935793	0.9	2443	41.604	7.146
LINE	L1	L1Md_T	UID-1001	+	chr19	49340301	49347486	0.89	2249	41.59	7.247
LINE	L1	L1Md_T	UID-2590	-	chr12	91936195	91943749	0.87	1234	41.587	7.84
LINE	L1	L1Md_T	UID-1926	+	chr14	107756644	107763296	0.906	2029	41.586	7.123
LINE	L1	L1Md_T	UID-1191	-	chrX	88991664	88998319	0.905	2699	41.577	7.103
LINE	L1	L1Md_T	UID-25	+	chr1	33407408	33414870	0.873	1361	41.573	7.077
LINE	L1	L1Md_T	UID-2335	-	chr9	86193259	86199477	0.897	1187	41.572	7.043
LINE	L1	L1Md_T	UID-1520	-	chr4	80961193	80967398	0.87	1017	41.572	7.054
LINE	L1	L1Md_T	UID-2447	-	chr7	113484620	113491484	0.897	2028	41.571	7.232
LINE	L1	L1Md_T	UID-2158	-	chr6	33659001	33665431	0.895	1454	41.562	7.232
LINE	L1	L1Md_T	UID-1644	+	chr2	172007053	172014338	0.875	1234	41.539	6.974
LINE	L1	L1Md_T	UID-2783	+	chr10	116024304	116030531	0.863	1513	41.536	6.965
LINE	L1	L1Md_T	UID-1719	-	chr2	40355836	40362551	0.886	1408	41.528	7.201
LINE	L1	L1Md_T	UID-147	-	chr1	137338840	137345503	0.881	1749	41.515	6.94
LINE	L1	L1Md_T	UID-1410	+	chrX	169159788	169166422	0.908	2507	41.498	7.029
LINE	L1	L1Md_T	UID-516	+	chr18	18664493	18670954	0.92	1581	41.492	6.906
LINE	L1	L1Md_T	UID-576	-	chr18	73343032	73349655	0.884	1554	41.477	7.087
LINE	L1	L1Md_T	UID-232	+	chr5	16903415	16910478	0.876	1811	41.476	7.441
LINE	L1	L1Md_T	UID-2770	+	chr10	106206520	106213579	0.891	1558	41.468	7.039
LINE	L1	L1Md_T	UID-922	+	chr11	38013280	38019683	0.919	1703	41.453	7.057
LINE	L1	L1Md_T	UID-2022	+	chr17	19103789	19110630	0.881	1435	41.452	6.959
LINE	L1	L1Md_T	UID-1846	-	chr8	56821263	56828091	0.886	1531	41.449	7.282
LINE	L1	L1Md_T	UID-365	-	chr5	46394411	46401249	0.912	1408	41.448	7.095
LINE	L1	L1Md_T	UID-2320	-	chr9	109303604	109310897	0.92	1435	41.44	7.067
LINE	L1	L1Md_T	UID-927	+	chr11	45724792	45732277	0.877	1479	41.44	7.119
LINE	L1	L1Md_T	UID-864	+	chr15	7849365	7855591	0.918	1672	41.428	7.129
LINE	L1	L1Md_T	UID-1127	-	chrX	164562657	164569329	0.848	2082	41.419	7.086
LINE	L1	L1Md_T	UID-2348	-	chr9	38833845	38840687	0.899	1423	41.414	6.976
LINE	L1	L1Md_T	UID-417	+	chr16	51129346	51136275	0.902	1631	41.404	7.422
LINE	L1	L1Md_T	UID-1140	-	chrX	150861629	150867869	0.86	1209	41.398	6.965
LINE	L1	L1Md_T	UID-152	-	chr1	126663689	126670162	0.89	1525	41.397	7.108
LINE	L1	L1Md_T	UID-1198	-	chrX	84153347	84160558	0.857	1435	41.397	7.156
LINE	L1	L1Md_T	UID-853	-	chr15	26242019	26248465	0.898	1364	41.394	6.969
LINE	L1	L1Md_T	UID-33	+	chr1	47105827	47112256	0.897	2017	41.394	7.297
LINE	L1	L1Md_T	UID-1484	+	chr4	115337248	115343632	0.87	2414	41.39	7.059
LINE	L1	L1Md_T	UID-315	-	chr5	98909376	98915934	0.873	1637	41.386	7.066
LINE	L1	L1Md_T	UID-1241	-	chrX	42566783	42573627	0.911	1208	41.384	7.289
LINE	L1	L1Md_T	UID-2656	-	chr10	97180053	97186265	0.893	1276	41.383	7.085
LINE	L1	L1Md_T	UID-2177	-	chr6	10699359	10706043	0.893	1077	41.364	7.038
LINE	L1	L1Md_T	UID-1656	-	chr2	124249126	124255977	0.913	1218	41.361	7.201
LINE	L1	L1Md_T	UID-829	-	chr15	54444352	54450774	0.901	1369	41.361	7.042
LINE	L1	L1Md_T	UID-2332	-	chr9	87945521	87952392	0.808	1568	41.357	6.932
LINE	L1	L1Md_T	UID-209	-	chr1	28186281	28192894	0.912	1038	41.351	6.987
LINE	L1	L1Md_T	UID-2651	-	chr10	102426902	102433167	0.942	1430	41.346	7.073
LINE	L1	L1Md_T	UID-1379	+	chrX	121585209	121591851	0.916	2502	41.338	7.247
LINE	L1	L1Md_T	UID-1507	-	chr4	94196504	94203080	0.901	1208	41.336	7.036
LINE	L1	L1Md_T	UID-2044	+	chr17	65331098	65337734	0.871	2451	41.325	7.46
LINE	L1	L1Md_T	UID-1081	+	chr13	26440598	26448238	0.943	2810	41.311	7.236
LINE	L1	L1Md_T	UID-998	+	chr19	31937145	31943796	0.928	2488	41.308	6.886
LINE	L1	L1Md_T	UID-2548	+	chr12	62959791	62967020	0.911	1239	41.304	7.048
LINE	L1	L1Md_T	UID-1426	+	chr4	17571119	17577768	0.882	2103	41.304	7.125
LINE	L1	L1Md_T	UID-616	+	chr3	7311144	7317586	0.9	2682	41.292	7.173
LINE	L1	L1Md_T	UID-141	-	chr1	145249025	145255500	0.877	1445	41.29	7.239
LINE	L1	L1Md_T	UID-396	+	chr16	19413069	19419694	0.906	2188	41.285	7.21
LINE	L1	L1Md_T	UID-262	+	chr5	64117746	64124362	0.897	2641	41.282	7.166
LINE	L1	L1Md_T	UID-2247	+	chr6	96787252	96793674	0.893	1767	41.277	6.81
LINE	L1	L1Md_T	UID-292	+	chr5	109122636	109129516	0.921	1245	41.273	7.533
LINE	L1	L1Md_T	UID-2569	+	chr12	97678198	97684637	0.897	2018	41.273	7.145
LINE	L1	L1Md_T	UID-493	-	chr16	47747764	47754015	0.899	1250	41.272	7.052
LINE	L1	L1Md_T	UID-2251	+	chr6	101643194	101650462	0.889	1769	41.268	7.545
LINE	L1	L1Md_T	UID-1928	+	chr14	111903188	111909813	0.876	2016	41.267	7.185
LINE	L1	L1Md_T	UID-1287	+	chrX	40833340	40840235	0.845	1755	41.264	7.172
LINE	L1	L1Md_T	UID-2441	-	chr7	131375115	131381364	0.907	1422	41.263	7.045
LINE	L1	L1Md_T	UID-409	+	chr16	46642576	46650279	0.872	1687	41.262	7.401
LINE	L1	L1Md_T	UID-193	-	chr1	61491786	61499623	0.823	1169	41.262	7.245
LINE	L1	L1Md_T	UID-23	+	chr1	32665664	32672085	0.909	1302	41.256	6.883
LINE	L1	L1Md_T	UID-2639	-	chr10	129587329	129594143	0.883	2284	41.251	7.151
LINE	L1	L1Md_T	UID-812	-	chr15	91080341	91087402	0.844	1635	41.238	7.218
LINE	L1	L1Md_T	UID-1804	-	chr8	112791153	112797837	0.937	1711	41.234	6.883
LINE	L1	L1Md_T	UID-2514	+	chr12	11187535	11194136	0.882	1292	41.233	7.249
LINE	L1	L1Md_T	UID-1160	-	chrX	126537391	126543849	0.91	1626	41.226	7.066
LINE	L1	L1Md_T	UID-2040	+	chr17	58171102	58177565	0.903	1765	41.209	7.125
LINE	L1	L1Md_T	UID-2221	+	chr6	60312124	60319724	0.87	1414	41.208	7.323
LINE	L1	L1Md_T	UID-542	+	chr18	56222494	56230217	0.862	2652	41.208	7.456
LINE	L1	L1Md_T	UID-1476	+	chr4	99731166	99737801	0.926	3272	41.206	6.929
LINE	L1	L1Md_T	UID-2217	+	chr6	57287626	57294223	0.927	3138	41.2	7.093
LINE	L1	L1Md_T	UID-2697	-	chr10	25934428	25943115	0.693	1377	41.192	7.127
LINE	L1	L1Md_T	UID-1574	+	chr2	6840041	6846660	0.915	2784	41.185	6.998
LINE	L1	L1Md_T	UID-1730	-	chr2	16375218	16382307	0.914	1316	41.18	7.231
LINE	L1	L1Md_T	UID-1272	+	chrX	19831040	19838102	0.905	2509	41.178	7.201
LINE	L1	L1Md_T	UID-1543	-	chr4	52079699	52087616	0.896	1435	41.171	7.466
LINE	L1	L1Md_T	UID-293	+	chr5	109160639	109166887	0.918	1885	41.169	6.866
LINE	L1	L1Md_T	UID-1399	+	chrX	156064006	156071112	0.872	2375	41.162	7.105
LINE	L1	L1Md_T	UID-846	-	chr15	32389620	32396059	0.908	1213	41.156	7.077
LINE	L1	L1Md_T	UID-1462	+	chr4	82041174	82048048	0.896	2207	41.154	7.326
LINE	L1	L1Md_T	UID-1268	+	chrX	10965222	10972709	0.926	2484	41.152	7.101
LINE	L1	L1Md_T	UID-963	-	chr11	45095955	45102020	0.907	1204	41.148	7.103
LINE	L1	L1Md_T	UID-1529	-	chr4	66631383	66638262	0.852	1182	41.146	7.169
LINE	L1	L1Md_T	UID-2127	-	chr6	69029574	69036446	0.877	927	41.142	7.301
LINE	L1	L1Md_T	UID-2581	-	chr12	101136320	101143803	0.94	1242	41.127	7.381
LINE	L1	L1Md_T	UID-1242	-	chrX	41989016	41995810	0.888	927	41.126	7.31
LINE	L1	L1Md_T	UID-105	+	chr1	162063584	162070163	0.866	2539	41.124	7.022
LINE	L1	L1Md_T	UID-2708	+	chr10	5089785	5096642	0.88	3041	41.112	7.31
LINE	L1	L1Md_T	UID-1446	+	chr4	53668401	53675921	0.883	1842	41.11	6.898
LINE	L1	L1Md_T	UID-17	+	chr1	25662055	25669291	0.911	2990	41.096	7.479
LINE	L1	L1Md_T	UID-1738	+	chr8	7542222	7548703	0.9	2338	41.096	7.164
LINE	L1	L1Md_T	UID-75	+	chr1	109871539	109878158	0.894	1502	41.09	6.927
LINE	L1	L1Md_T	UID-2464	-	chr7	82155059	82161239	0.863	927	41.079	6.988
LINE	L1	L1Md_T	UID-1801	+	chr8	112483589	112490284	0.882	1582	41.07	7.342
LINE	L1	L1Md_T	UID-1071	+	chr13	4981927	4989875	0.871	961	41.053	7.319
LINE	L1	L1Md_T	UID-1980	-	chr14	68748752	68754982	0.925	1435	41.052	6.832
LINE	L1	L1Md_T	UID-789	-	chr3	26106759	26113413	0.919	1462	41.038	7.34
LINE	L1	L1Md_T	UID-2178	-	chr6	9139114	9145589	0.875	1462	41.026	6.883
LINE	L1	L1Md_T	UID-1139	-	chrX	152478506	152485498	0.827	845	41.023	6.939
LINE	L1	L1Md_T	UID-1188	-	chrX	91049956	91056016	0.869	1212	41.005	6.909
LINE	L1	L1Md_T	UID-1820	-	chr8	86372534	86379128	0.899	1151	40.992	7.179
LINE	L1	L1Md_T	UID-1046	-	chr13	50893369	50899821	0.885	1469	40.988	6.961
LINE	L1	L1Md_T	UID-1519	-	chr4	82187245	82193666	0.907	1356	40.975	7.03
LINE	L1	L1Md_T	UID-831	-	chr15	52730866	52737250	0.892	1488	40.975	7.135
LINE	L1	L1Md_T	UID-2465	-	chr7	77648518	77655175	0.922	1804	40.973	7.495
LINE	L1	L1Md_T	UID-1771	+	chr8	57182604	57189499	0.888	1850	40.969	7.197
LINE	L1	L1Md_T	UID-1932	+	chr14	116788435	116795091	0.935	3023	40.936	7.092
LINE	L1	L1Md_T	UID-1073	+	chr13	8167017	8173223	0.906	1660	40.936	6.958
LINE	L1	L1Md_T	UID-1622	+	chr2	110237213	110243616	0.893	1610	40.932	6.929
LINE	L1	L1Md_T	UID-1235	-	chrX	49561152	49567515	0.9	1218	40.928	6.998
LINE	L1	L1Md_T	UID-903	+	chr15	101655653	101662120	0.876	1301	40.928	7.156
LINE	L1	L1Md_T	UID-1587	+	chr2	43408603	43415062	0.904	1499	40.927	7.349
LINE	L1	L1Md_T	UID-834	-	chr15	49108694	49115269	0.877	1343	40.926	6.67
LINE	L1	L1Md_T	UID-1606	+	chr2	78616849	78623435	0.888	1600	40.925	7.231
LINE	L1	L1Md_T	UID-1164	-	chrX	121949583	121956643	0.895	1423	40.921	6.865
LINE	L1	L1Md_T	UID-2392	+	chr7	54923020	54929870	0.897	1529	40.912	7.05
LINE	L1	L1Md_T	UID-2747	+	chr10	56287254	56293940	0.915	1380	40.911	6.968
LINE	L1	L1Md_T	UID-2138	-	chr6	62035193	62042183	0.877	1233	40.902	7.127
LINE	L1	L1Md_T	UID-1448	+	chr4	64454574	64461870	0.89	985	40.901	6.915
LINE	L1	L1Md_T	UID-82	+	chr1	124141343	124147741	0.868	1472	40.897	6.847
LINE	L1	L1Md_T	UID-2699	-	chr10	19979208	19985628	0.892	1435	40.883	7.076
LINE	L1	L1Md_T	UID-1811	-	chr8	100274873	100281300	0.918	1435	40.881	7.177
LINE	L1	L1Md_T	UID-330	-	chr5	87539758	87546188	0.889	1594	40.88	6.811
LINE	L1	L1Md_T	UID-2039	+	chr17	57699044	57705726	0.906	3139	40.872	6.969
LINE	L1	L1Md_T	UID-337	-	chr5	80451583	80457987	0.916	1435	40.86	7.121
LINE	L1	L1Md_T	UID-1107	+	chr13	83812755	83818956	0.92	2352	40.842	6.913
LINE	L1	L1Md_T	UID-583	-	chr18	53560496	53566746	0.869	1365	40.835	6.952
LINE	L1	L1Md_T	UID-1910	+	chr14	60875470	60881676	0.916	851	40.833	7.016
LINE	L1	L1Md_T	UID-1567	-	chr4	12953538	12959963	0.901	969	40.83	7.117
LINE	L1	L1Md_T	UID-132	-	chr1	164736572	164743045	0.88	1616	40.824	6.835
LINE	L1	L1Md_T	UID-34	+	chr1	47587691	47593921	0.841	2079	40.817	6.867
LINE	L1	L1Md_T	UID-619	+	chr3	15028453	15034921	0.856	1553	40.806	6.808
LINE	L1	L1Md_T	UID-898	+	chr15	68885885	68892305	0.891	2330	40.796	7.033
LINE	L1	L1Md_T	UID-512	+	chr18	14732823	14739071	0.908	1734	40.791	7.04
LINE	L1	L1Md_T	UID-2677	-	chr10	54613346	54619921	0.89	1158	40.79	7.09
LINE	L1	L1Md_T	UID-904	+	chr15	103410625	103418540	0.896	1184	40.769	7.146
LINE	L1	L1Md_T	UID-331	-	chr5	86362923	86369560	0.918	3170	40.761	7.051
LINE	L1	L1Md_T	UID-156	-	chr1	116356739	116363586	0.899	1847	40.754	6.957
LINE	L1	L1Md_T	UID-2328	-	chr9	92446393	92453452	0.913	1806	40.741	7.241
LINE	L1	L1Md_T	UID-570	-	chr18	85108958	85115156	0.755	891	40.739	5.999
LINE	L1	L1Md_T	UID-569	-	chr18	85108958	85115156	0.755	891	40.739	5.999
LINE	L1	L1Md_T	UID-1208	-	chrX	72679204	72685692	0.883	1208	40.738	7.092
LINE	L1	L1Md_T	UID-160	-	chr1	114176652	114183955	0.898	1230	40.737	7.122
LINE	L1	L1Md_T	UID-1736	-	chr2	8183366	8190669	0.913	1006	40.736	7.005
LINE	L1	L1Md_T	UID-524	+	chr18	25780887	25787344	0.919	1111	40.728	7.052
LINE	L1	L1Md_T	UID-758	-	chr3	65189383	65197518	0.89	1005	40.728	7.476
LINE	L1	L1Md_T	UID-830	-	chr15	54204688	54211280	0.816	1060	40.727	6.876
LINE	L1	L1Md_T	UID-52	+	chr1	69231433	69238518	0.901	2990	40.726	7.205
LINE	L1	L1Md_T	UID-1147	-	chrX	141741381	141747864	0.908	1454	40.725	7.053
LINE	L1	L1Md_T	UID-2355	-	chr9	35879903	35887412	0.89	1275	40.723	7.282
LINE	L1	L1Md_T	UID-482	-	chr16	59777786	59784420	0.909	1217	40.717	7.015
LINE	L1	L1Md_T	UID-78	+	chr1	120993989	1.21E+08	0.889	2475	40.714	6.618
LINE	L1	L1Md_T	UID-2100	-	chr6	116572541	116579015	0.884	1076	40.7	7.023
LINE	L1	L1Md_T	UID-985	+	chr19	12503096	12509273	0.903	2217	40.676	6.981
LINE	L1	L1Md_T	UID-1401	+	chrX	156931745	156938397	0.882	1684	40.648	6.889
LINE	L1	L1Md_T	UID-123	-	chr1	186591934	186598142	0.855	927	40.644	6.742
LINE	L1	L1Md_T	UID-1372	+	chrX	110945271	110951896	0.919	1344	40.637	6.977
LINE	L1	L1Md_T	UID-1165	-	chrX	121733059	121740539	0.938	1242	40.634	7.361
LINE	L1	L1Md_T	UID-2377	+	chr7	16661370	16667831	0.901	1692	40.623	7.095
LINE	L1	L1Md_T	UID-1374	+	chrX	114140205	114146665	0.909	1619	40.622	6.933
LINE	L1	L1Md_T	UID-2683	-	chr10	50673091	50679524	0.873	1408	40.616	7.042
LINE	L1	L1Md_T	UID-393	+	chr16	12462396	12469445	0.918	1616	40.613	7.414
LINE	L1	L1Md_T	UID-785	-	chr3	29461468	29467873	0.914	1435	40.597	7.057
LINE	L1	L1Md_T	UID-1112	+	chr13	89861989	89868365	0.905	2842	40.597	7.067
LINE	L1	L1Md_T	UID-2400	+	chr7	59125188	59131582	0.905	1791	40.587	6.887
LINE	L1	L1Md_T	UID-1683	-	chr2	88664174	88670633	0.899	1626	40.586	6.915
LINE	L1	L1Md_T	UID-2342	-	chr9	68145706	68152137	0.932	1698	40.581	7.021
LINE	L1	L1Md_T	UID-2533	+	chr12	38074669	38081118	0.899	1894	40.575	6.843
LINE	L1	L1Md_T	UID-436	+	chr16	74971541	74977783	0.89	2173	40.574	6.837
LINE	L1	L1Md_T	UID-972	-	chr11	27382657	27389454	0.904	972	40.57	6.806
LINE	L1	L1Md_T	UID-1184	-	chrX	96827841	96834305	0.884	1544	40.567	6.753
LINE	L1	L1Md_T	UID-1288	+	chrX	41231748	41238503	0.879	1570	40.563	7.001
LINE	L1	L1Md_T	UID-1033	-	chr13	84483409	84490680	0.818	1361	40.561	6.936
LINE	L1	L1Md_T	UID-1076	+	chr13	16939993	16946245	0.889	936	40.553	6.894
LINE	L1	L1Md_T	UID-999	+	chr19	33762408	33768834	0.872	2889	40.552	6.877
LINE	L1	L1Md_T	UID-2336	-	chr9	82469920	82476584	0.872	1324	40.552	6.839
LINE	L1	L1Md_T	UID-1899	+	chr14	43218302	43224710	0.905	2284	40.551	7.015
LINE	L1	L1Md_T	UID-2662	-	chr10	87064880	87071523	0.897	1438	40.551	6.793
LINE	L1	L1Md_T	UID-1159	-	chrX	127124749	127131158	0.888	1435	40.541	7
LINE	L1	L1Md_T	UID-2602	-	chr12	68434859	68441302	0.926	1208	40.531	6.882
LINE	L1	L1Md_T	UID-1590	+	chr2	48578878	48585620	0.884	1283	40.526	6.951
LINE	L1	L1Md_T	UID-336	-	chr5	80471230	80477886	0.906	1435	40.52	7.034
LINE	L1	L1Md_T	UID-2402	+	chr7	60322385	60328653	0.844	1672	40.507	6.81
LINE	L1	L1Md_T	UID-1572	-	chr4	5708659	5715315	0.923	1503	40.498	7.062
LINE	L1	L1Md_T	UID-2591	-	chr12	91467423	91474966	0.847	1290	40.497	6.762
LINE	L1	L1Md_T	UID-2512	+	chr12	8123892	8130520	0.936	1503	40.488	6.987
LINE	L1	L1Md_T	UID-2239	+	chr6	80378964	80385384	0.893	2062	40.487	6.657
LINE	L1	L1Md_T	UID-845	-	chr15	33486926	33493337	0.946	1240	40.484	7.023
LINE	L1	L1Md_T	UID-30	+	chr1	44959260	44966531	0.84	1591	40.483	7.087
LINE	L1	L1Md_T	UID-31	+	chr1	44959260	44966531	0.84	1591	40.483	7.087
LINE	L1	L1Md_T	UID-1016	-	chr19	20567338	20573795	0.886	927	40.479	6.856
LINE	L1	L1Md_T	UID-74	+	chr1	109034648	109041502	0.86	1622	40.472	7.049
LINE	L1	L1Md_T	UID-2066	-	chr17	72628844	72635652	0.915	1276	40.469	7.27
LINE	L1	L1Md_T	UID-467	-	chr16	73991869	73998539	0.876	1273	40.462	6.821
LINE	L1	L1Md_T	UID-217	-	chr1	15257902	15264360	0.884	1265	40.457	6.886
LINE	L1	L1Md_T	UID-816	-	chr15	72088288	72095346	0.907	1435	40.449	7.003
LINE	L1	L1Md_T	UID-2358	-	chr9	23277706	23284375	0.874	1083	40.449	6.903
LINE	L1	L1Md_T	UID-2713	+	chr10	10975372	10981811	0.875	2096	40.448	6.856
LINE	L1	L1Md_T	UID-1094	+	chr13	63437642	63443866	0.891	1474	40.445	6.691
LINE	L1	L1Md_T	UID-2163	-	chr6	24279364	24285767	0.903	927	40.44	6.997
LINE	L1	L1Md_T	UID-2718	+	chr10	13894819	13901237	0.888	1491	40.433	7.021
LINE	L1	L1Md_T	UID-1179	-	chrX	100859052	100865917	0.872	1276	40.433	7.114
LINE	L1	L1Md_T	UID-421	+	chr16	58249426	58255691	0.93	1430	40.396	6.922
LINE	L1	L1Md_T	UID-1509	-	chr4	91894437	91900864	0.91	1373	40.391	7.146
LINE	L1	L1Md_T	UID-2388	+	chr7	52769448	52775894	0.908	1107	40.39	7.063
LINE	L1	L1Md_T	UID-1407	+	chrX	164614962	164622235	0.905	1764	40.372	7.04
LINE	L1	L1Md_T	UID-2069	-	chr17	65085595	65092255	0.883	1222	40.368	7.012
LINE	L1	L1Md_T	UID-2670	-	chr10	65383218	65389869	0.903	927	40.367	7.186
LINE	L1	L1Md_T	UID-1593	+	chr2	54717743	54724318	0.82	1510	40.364	6.495
LINE	L1	L1Md_T	UID-1764	+	chr8	50243894	50250045	0.881	2186	40.361	6.912
LINE	L1	L1Md_T	UID-2296	+	chr9	55828643	55835134	0.911	2168	40.343	6.964
LINE	L1	L1Md_T	UID-561	+	chr18	90373733	90380578	0.89	1842	40.339	6.801
LINE	L1	L1Md_T	UID-1389	+	chrX	142862857	142869087	0.922	2834	40.338	6.66
LINE	L1	L1Md_T	UID-2025	+	chr17	33278639	33285503	0.907	1742	40.338	7.034
LINE	L1	L1Md_T	UID-540	+	chr18	50782871	50789533	0.922	2323	40.333	6.945
LINE	L1	L1Md_T	UID-655	+	chr3	62205913	62212750	0.866	1257	40.331	6.951
LINE	L1	L1Md_T	UID-765	-	chr3	59393885	59400790	0.83	1423	40.328	6.825
LINE	L1	L1Md_T	UID-993	+	chr19	21218181	21224806	0.89	1716	40.323	7.013
LINE	L1	L1Md_T	UID-36	+	chr1	48545548	48553240	0.833	2215	40.319	7.096
LINE	L1	L1Md_T	UID-2031	+	chr17	39992384	39999030	0.877	2651	40.313	6.763
LINE	L1	L1Md_T	UID-1466	+	chr4	88360839	88367436	0.885	966	40.311	6.787
LINE	L1	L1Md_T	UID-959	-	chr11	54381425	54388547	0.9	934	40.308	6.753
LINE	L1	L1Md_T	UID-476	-	chr16	65040835	65047708	0.906	1423	40.305	6.747
LINE	L1	L1Md_T	UID-2169	-	chr6	19068875	19075489	0.889	1554	40.291	6.804
LINE	L1	L1Md_T	UID-2052	+	chr17	77829059	77835598	0.882	1441	40.278	6.725
LINE	L1	L1Md_T	UID-2124	-	chr6	73447995	73454443	0.944	1435	40.268	6.972
LINE	L1	L1Md_T	UID-2123	-	chr6	73447995	73454443	0.944	1435	40.268	6.972
LINE	L1	L1Md_T	UID-1994	-	chr14	41292590	41299036	0.91	998	40.263	6.692
LINE	L1	L1Md_T	UID-1710	-	chr2	47635750	47642998	0.89	1240	40.257	6.93
LINE	L1	L1Md_T	UID-187	-	chr1	69962760	69969128	0.891	1416	40.253	7.05
LINE	L1	L1Md_T	UID-2014	-	chr14	6623735	6630176	0.883	1240	40.248	6.959
LINE	L1	L1Md_T	UID-520	+	chr18	22877606	22884228	0.835	1048	40.24	6.868
LINE	L1	L1Md_T	UID-99	+	chr1	147671265	147677682	0.894	1866	40.236	6.872
LINE	L1	L1Md_T	UID-158	-	chr1	114764510	114771171	0.903	1225	40.235	6.843
LINE	L1	L1Md_T	UID-210	-	chr1	21195394	21202212	0.851	1250	40.23	6.774
LINE	L1	L1Md_T	UID-200	-	chr1	47080714	47086821	0.898	1268	40.218	6.794
LINE	L1	L1Md_T	UID-2777	+	chr10	110504432	110510862	0.863	1081	40.211	6.911
LINE	L1	L1Md_T	UID-2048	+	chr17	70229322	70236637	0.916	1230	40.203	6.981
LINE	L1	L1Md_T	UID-2298	+	chr9	70903734	70910166	0.896	1798	40.186	6.769
LINE	L1	L1Md_T	UID-271	+	chr5	71831837	71838507	0.885	1416	40.18	6.97
LINE	L1	L1Md_T	UID-250	+	chr5	56471505	56478368	0.859	927	40.171	7.105
LINE	L1	L1Md_T	UID-971	-	chr11	28347405	28353805	0.913	1361	40.169	7.036
LINE	L1	L1Md_T	UID-2688	-	chr10	38258174	38264578	0.856	2100	40.161	6.688
LINE	L1	L1Md_T	UID-159	-	chr1	114223881	114230344	0.897	1214	40.153	6.828
LINE	L1	L1Md_T	UID-942	+	chr11	91020492	91026920	0.912	1371	40.15	6.862
LINE	L1	L1Md_T	UID-2479	-	chr7	57367190	57374716	0.881	1425	40.139	7.215
LINE	L1	L1Md_T	UID-280	+	chr5	85263872	85270272	0.885	1881	40.116	6.827
LINE	L1	L1Md_T	UID-85	+	chr1	126792205	126798362	0.899	1943	40.115	6.716
LINE	L1	L1Md_T	UID-1815	-	chr8	97545285	97551943	0.916	1081	40.113	7.03
LINE	L1	L1Md_T	UID-1614	+	chr2	90373303	90379922	0.878	1845	40.113	7.014
LINE	L1	L1Md_T	UID-602	-	chr18	16988608	16995215	0.881	927	40.112	7.019
LINE	L1	L1Md_T	UID-2650	-	chr10	103207570	103214152	0.896	1208	40.105	6.933
LINE	L1	L1Md_T	UID-2725	+	chr10	28040992	28047221	0.877	1046	40.086	6.729
LINE	L1	L1Md_T	UID-1136	-	chrX	156949110	156955495	0.881	1366	40.071	6.889
LINE	L1	L1Md_T	UID-2147	-	chr6	44725083	44731498	0.932	1334	40.07	7
LINE	L1	L1Md_T	UID-391	-	chr5	3981532	3988567	0.913	2106	40.068	6.901
LINE	L1	L1Md_T	UID-2230	+	chr6	70524186	70531040	0.892	1772	40.06	6.773
LINE	L1	L1Md_T	UID-2028	+	chr17	37811143	37817672	0.891	1662	40.042	7.068
LINE	L1	L1Md_T	UID-447	+	chr16	87112120	87118556	0.842	2126	40.041	6.836
LINE	L1	L1Md_T	UID-1359	+	chrX	100294708	100301765	0.889	1687	40.034	7.241
LINE	L1	L1Md_T	UID-1205	-	chrX	75194300	75201424	0.877	1138	40.02	6.855
LINE	L1	L1Md_T	UID-1294	+	chrX	44489213	44495839	0.904	1972	40.019	6.942
LINE	L1	L1Md_T	UID-2582	-	chr12	99142005	99148663	0.903	1326	39.985	6.956
LINE	L1	L1Md_T	UID-1387	+	chrX	137426733	137433582	0.912	1269	39.983	6.592
LINE	L1	L1Md_T	UID-2480	-	chr7	56571200	56577919	0.905	1414	39.962	7.119
LINE	L1	L1Md_T	UID-57	+	chr1	79380835	79387310	0.886	1458	39.962	6.772
LINE	L1	L1Md_T	UID-1329	+	chrX	74933003	74939255	0.909	1438	39.96	6.634
LINE	L1	L1Md_T	UID-1781	+	chr8	65590878	65597470	0.897	912	39.958	6.524
LINE	L1	L1Md_T	UID-757	-	chr3	66226286	66233347	0.923	1364	39.957	7.139
LINE	L1	L1Md_T	UID-1398	+	chrX	155459226	155466096	0.867	2008	39.938	6.959
LINE	L1	L1Md_T	UID-1055	-	chr13	29064821	29072957	0.878	2549	39.93	7.316
LINE	L1	L1Md_T	UID-2175	-	chr6	11779704	11785724	0.858	927	39.927	6.682
LINE	L1	L1Md_T	UID-2434	+	chr7	114119956	114126202	0.857	1275	39.926	6.775
LINE	L1	L1Md_T	UID-1180	-	chrX	100758974	100765455	0.92	1288	39.9	6.928
LINE	L1	L1Md_T	UID-2165	-	chr6	23668680	23675106	0.883	1217	39.882	6.883
LINE	L1	L1Md_T	UID-1035	-	chr13	82688160	82694699	0.846	1253	39.88	6.823
LINE	L1	L1Md_T	UID-2504	-	chr7	5716357	5722776	0.89	1308	39.871	6.7
LINE	L1	L1Md_T	UID-2596	-	chr12	82633632	82640491	0.891	1240	39.87	7.068
LINE	L1	L1Md_T	UID-364	-	chr5	47281286	47287725	0.855	1195	39.868	6.599
LINE	L1	L1Md_T	UID-1089	+	chr13	48297080	48303906	0.907	938	39.864	6.749
LINE	L1	L1Md_T	UID-19	+	chr1	28287584	28294845	0.927	2046	39.83	7.273
LINE	L1	L1Md_T	UID-2215	+	chr6	53402856	53409079	0.898	1416	39.828	6.671
LINE	L1	L1Md_T	UID-1479	+	chr4	105735393	105742028	0.902	1967	39.826	7.046
LINE	L1	L1Md_T	UID-2502	-	chr7	12283206	12290275	0.865	1084	39.821	6.803
LINE	L1	L1Md_T	UID-2746	+	chr10	56031086	56037524	0.87	1828	39.818	6.873
LINE	L1	L1Md_T	UID-126	-	chr1	177213043	177219469	0.91	1461	39.809	6.819
LINE	L1	L1Md_T	UID-1231	-	chrX	57598438	57605434	0.909	1208	39.802	7.051
LINE	L1	L1Md_T	UID-1090	+	chr13	50119328	50126420	0.925	1504	39.8	6.611
LINE	L1	L1Md_T	UID-503	-	chr16	20915735	20921960	0.896	972	39.792	6.648
LINE	L1	L1Md_T	UID-1240	-	chrX	42920690	42927131	0.875	1604	39.788	6.828
LINE	L1	L1Md_T	UID-910	+	chr11	14915873	14922094	0.867	1314	39.784	6.677
LINE	L1	L1Md_T	UID-1946	-	chr14	116635146	116641575	0.855	1250	39.775	6.981
LINE	L1	L1Md_T	UID-1421	+	chr4	16058712	16064961	0.908	2297	39.766	6.719
LINE	L1	L1Md_T	UID-390	-	chr5	6396457	6407470	0.506	1334	39.766	6.593
LINE	L1	L1Md_T	UID-1166	-	chrX	120959173	120965658	0.906	1571	39.765	6.49
LINE	L1	L1Md_T	UID-2463	-	chr7	83179753	83186375	0.883	1240	39.762	6.985
LINE	L1	L1Md_T	UID-2120	-	chr6	79277787	79284693	0.911	1578	39.756	6.915
LINE	L1	L1Md_T	UID-151	-	chr1	126767502	126773903	0.878	1488	39.756	7.033
LINE	L1	L1Md_T	UID-2098	-	chr6	118209139	118215791	0.864	1351	39.747	6.712
LINE	L1	L1Md_T	UID-2309	+	chr9	95292058	95299605	0.886	1977	39.744	7.296
LINE	L1	L1Md_T	UID-1322	+	chrX	67013275	67020420	0.911	1435	39.741	7.037
LINE	L1	L1Md_T	UID-69	+	chr1	101302418	101308859	0.858	2740	39.736	6.901
LINE	L1	L1Md_T	UID-1816	-	chr8	96193357	96199586	0.886	1461	39.735	6.888
LINE	L1	L1Md_T	UID-1216	-	chrX	64883709	64890490	0.909	1675	39.732	7.035
LINE	L1	L1Md_T	UID-582	-	chr18	62286402	62293250	0.898	1305	39.724	7.029
LINE	L1	L1Md_T	UID-1970	-	chr14	80349146	80356136	0.919	1120	39.719	7.038
LINE	L1	L1Md_T	UID-1849	-	chr8	49600545	49606751	0.887	1054	39.703	6.76
LINE	L1	L1Md_T	UID-273	+	chr5	77409639	77416040	0.884	2434	39.702	6.628
LINE	L1	L1Md_T	UID-1212	-	chrX	69930888	69938522	0.938	1394	39.7	7.117
LINE	L1	L1Md_T	UID-10	+	chr1	20432213	20439495	0.892	2580	39.683	7.29
LINE	L1	L1Md_T	UID-267	+	chr5	70071056	70077884	0.909	1679	39.674	7.008
LINE	L1	L1Md_T	UID-738	-	chr3	102429716	102436379	0.873	1096	39.666	6.936
LINE	L1	L1Md_T	UID-2541	+	chr12	49701834	49708490	0.902	1091	39.656	6.754
LINE	L1	L1Md_T	UID-1595	+	chr2	55492247	55498334	0.943	2135	39.654	6.849
LINE	L1	L1Md_T	UID-2311	+	chr9	101427489	101434760	0.917	1400	39.654	6.881
LINE	L1	L1Md_T	UID-222	-	chr1	7328661	7335740	0.907	1335	39.654	6.779
LINE	L1	L1Md_T	UID-1671	-	chr2	104009218	104016277	0.917	1919	39.645	7.05
LINE	L1	L1Md_T	UID-251	+	chr5	56493168	56499596	0.889	1325	39.643	6.991
LINE	L1	L1Md_T	UID-1412	+	chrX	169411406	169418270	0.881	1310	39.638	6.749
LINE	L1	L1Md_T	UID-1404	+	chrX	158869841	158876503	0.845	1435	39.633	7.106
LINE	L1	L1Md_T	UID-412	+	chr16	47375733	47382603	0.832	1368	39.624	6.741
LINE	L1	L1Md_T	UID-768	-	chr3	55916146	55922488	0.864	1461	39.622	6.829
LINE	L1	L1Md_T	UID-1864	-	chr8	28861116	28867481	0.891	1062	39.619	7.133
LINE	L1	L1Md_T	UID-1392	+	chrX	150529986	150536289	0.888	2671	39.596	6.715
LINE	L1	L1Md_T	UID-432	+	chr16	71276439	71283176	0.899	2199	39.591	7.147
LINE	L1	L1Md_T	UID-2319	-	chr9	109360925	109367567	0.903	1382	39.587	6.736
LINE	L1	L1Md_T	UID-599	-	chr18	22963085	22969472	0.885	1177	39.585	6.626
LINE	L1	L1Md_T	UID-2737	+	chr10	45516944	45523367	0.919	1227	39.579	6.826
LINE	L1	L1Md_T	UID-169	-	chr1	104273776	104280137	0.889	1531	39.579	6.706
LINE	L1	L1Md_T	UID-2378	+	chr7	18487037	18493245	0.904	1535	39.557	6.838
LINE	L1	L1Md_T	UID-2047	+	chr17	70149967	70156824	0.896	2863	39.557	7.058
LINE	L1	L1Md_T	UID-111	+	chr1	166912461	166918885	0.882	1441	39.557	6.572
LINE	L1	L1Md_T	UID-826	-	chr15	56900856	56908604	0.723	863	39.553	7.062
LINE	L1	L1Md_T	UID-1301	+	chrX	49356391	49362940	0.88	2198	39.552	6.867
LINE	L1	L1Md_T	UID-534	+	chr18	37630214	37637087	0.934	1479	39.55	6.993
LINE	L1	L1Md_T	UID-1068	-	chr13	6667782	6674639	0.874	1197	39.545	6.886
LINE	L1	L1Md_T	UID-191	-	chr1	62671355	62677568	0.905	1376	39.535	6.679
LINE	L1	L1Md_T	UID-719	-	chr3	147218991	147225426	0.88	1461	39.535	6.838
LINE	L1	L1Md_T	UID-104	+	chr1	161932827	161939163	0.863	1269	39.535	6.504
LINE	L1	L1Md_T	UID-936	+	chr11	63646913	63653566	0.895	1177	39.534	6.84
LINE	L1	L1Md_T	UID-2634	-	chr12	14669741	14675974	0.881	1403	39.534	6.75
LINE	L1	L1Md_T	UID-1678	-	chr2	94884541	94891394	0.89	1816	39.532	6.765
LINE	L1	L1Md_T	UID-2539	+	chr12	43748764	43755294	0.855	1340	39.527	6.913
LINE	L1	L1Md_T	UID-508	+	chr18	4021882	4029360	0.917	2335	39.524	7.001
LINE	L1	L1Md_T	UID-2206	+	chr6	32093592	32100651	0.929	2051	39.513	6.687
LINE	L1	L1Md_T	UID-2115	-	chr6	95794366	95800789	0.908	1564	39.503	6.655
LINE	L1	L1Md_T	UID-2743	+	chr10	49823496	49830791	0.87	1717	39.496	6.615
LINE	L1	L1Md_T	UID-827	-	chr15	55677600	55684869	0.908	846	39.489	7.146
LINE	L1	L1Md_T	UID-1278	+	chrX	24521348	24527572	0.89	1927	39.485	6.504
LINE	L1	L1Md_T	UID-2151	-	chr6	43737637	43744450	0.891	927	39.476	6.632
LINE	L1	L1Md_T	UID-2560	+	chr12	75379421	75386301	0.9	2354	39.463	6.919
LINE	L1	L1Md_T	UID-2511	+	chr12	7801859	7808516	0.901	1937	39.461	6.664
LINE	L1	L1Md_T	UID-1271	+	chrX	19651284	19657664	0.888	1407	39.461	7.07
LINE	L1	L1Md_T	UID-2297	+	chr9	60045499	60051795	0.924	1428	39.46	6.857
LINE	L1	L1Md_T	UID-1862	-	chr8	29354118	29360749	0.91	1435	39.453	7.018
LINE	L1	L1Md_T	UID-881	+	chr15	47180597	47186996	0.873	926	39.452	7.015
LINE	L1	L1Md_T	UID-1468	+	chr4	88668298	88674744	0.883	1324	39.45	6.404
LINE	L1	L1Md_T	UID-1913	+	chr14	72948016	72954652	0.884	1098	39.433	6.986
LINE	L1	L1Md_T	UID-2390	+	chr7	53557560	53564185	0.851	1473	39.432	6.748
LINE	L1	L1Md_T	UID-2143	-	chr6	56293304	56300029	0.878	972	39.427	6.499
LINE	L1	L1Md_T	UID-341	-	chr5	71382573	71389416	0.873	1218	39.424	6.72
LINE	L1	L1Md_T	UID-1788	+	chr8	77907119	77914005	0.936	2824	39.415	7.067
LINE	L1	L1Md_T	UID-1704	-	chr2	53919712	53926005	0.879	927	39.414	6.607
LINE	L1	L1Md_T	UID-2341	-	chr9	71189701	71196970	0.955	1394	39.41	7.112
LINE	L1	L1Md_T	UID-1516	-	chr4	87674515	87680938	0.87	1392	39.41	6.763
LINE	L1	L1Md_T	UID-2294	+	chr9	53959178	53965384	0.881	927	39.407	6.538
LINE	L1	L1Md_T	UID-702	+	chr3	134815343	134821778	0.796	1015	39.404	6.705
LINE	L1	L1Md_T	UID-1045	-	chr13	59101488	59107951	0.897	1484	39.402	6.796
LINE	L1	L1Md_T	UID-1409	+	chrX	167213363	167220198	0.888	927	39.399	6.844
LINE	L1	L1Md_T	UID-2411	+	chr7	73007548	73013989	0.884	2017	39.396	6.844
LINE	L1	L1Md_T	UID-1682	-	chr2	88705057	88711581	0.876	1248	39.394	6.911
LINE	L1	L1Md_T	UID-1226	-	chrX	59460119	59466549	0.873	1554	39.392	6.802
LINE	L1	L1Md_T	UID-1763	+	chr8	49981862	49988741	0.888	766	39.389	6.895
LINE	L1	L1Md_T	UID-2437	+	chr7	119504819	119511048	0.894	1346	39.384	6.558
LINE	L1	L1Md_T	UID-1602	+	chr2	65775088	65781512	0.902	1483	39.382	7.088
LINE	L1	L1Md_T	UID-527	+	chr18	29194635	29201702	0.897	1304	39.378	6.861
LINE	L1	L1Md_T	UID-1868	-	chr8	26580644	26587710	0.876	878	39.378	6.871
LINE	L1	L1Md_T	UID-1000	+	chr19	35904001	35911212	0.901	2996	39.374	6.943
LINE	L1	L1Md_T	UID-347	-	chr5	68099551	68105972	0.938	1435	39.371	6.699
LINE	L1	L1Md_T	UID-1063	-	chr13	7124285	7130891	0.893	1269	39.371	6.97
LINE	L1	L1Md_T	UID-256	+	chr5	60651657	60658232	0.899	2025	39.369	6.776
LINE	L1	L1Md_T	UID-2077	-	chr17	53929921	53936718	0.905	927	39.357	6.679
LINE	L1	L1Md_T	UID-1106	+	chr13	80024025	80030909	0.89	1913	39.357	6.652
LINE	L1	L1Md_T	UID-2599	-	chr12	77404862	77411301	0.908	927	39.354	6.679
LINE	L1	L1Md_T	UID-988	+	chr19	13899472	13906313	0.888	2740	39.35	6.879
LINE	L1	L1Md_T	UID-865	+	chr15	17266409	17273662	0.92	3017	39.341	6.999
LINE	L1	L1Md_T	UID-2053	+	chr17	81683847	81690482	0.909	1802	39.338	6.764
LINE	L1	L1Md_T	UID-2086	-	chr17	16670330	16676771	0.868	1365	39.321	6.776
LINE	L1	L1Md_T	UID-2638	-	chr12	9677173	9683703	0.844	1472	39.321	6.701
LINE	L1	L1Md_T	UID-1997	-	chr14	37191658	37198062	0.869	1443	39.317	6.633
LINE	L1	L1Md_T	UID-1780	+	chr8	65403387	65410231	0.874	1737	39.314	7.1
LINE	L1	L1Md_T	UID-468	-	chr16	73730228	73737075	0.912	2011	39.313	6.979
LINE	L1	L1Md_T	UID-1341	+	chrX	81243141	81249420	0.873	2144	39.312	6.562
LINE	L1	L1Md_T	UID-795	-	chr3	18716969	18723332	0.895	1057	39.308	6.378
LINE	L1	L1Md_T	UID-2687	-	chr10	38766505	38773320	0.918	1244	39.299	6.796
LINE	L1	L1Md_T	UID-1275	+	chrX	23521092	23527495	0.905	2121	39.297	6.856
LINE	L1	L1Md_T	UID-1498	-	chr4	110315506	110322167	0.902	1194	39.276	6.609
LINE	L1	L1Md_T	UID-88	+	chr1	131680542	131686990	0.912	2711	39.275	6.828
LINE	L1	L1Md_T	UID-1834	-	chr8	64287780	64293987	0.914	1104	39.255	6.698
LINE	L1	L1Md_T	UID-451	+	chr16	89329135	89336599	0.895	1046	39.253	6.964
LINE	L1	L1Md_T	UID-2483	-	chr7	55079986	55086416	0.886	1248	39.253	7.079
LINE	L1	L1Md_T	UID-2726	+	chr10	28526812	28533207	0.92	1263	39.243	6.435
LINE	L1	L1Md_T	UID-1040	-	chr13	72385773	72392895	0.905	863	39.231	6.616
LINE	L1	L1Md_T	UID-1702	-	chr2	56465283	56471918	0.879	878	39.228	6.813
LINE	L1	L1Md_T	UID-241	+	chr5	31988620	31994808	0.907	2741	39.224	6.774
LINE	L1	L1Md_T	UID-2201	+	chr6	26604920	26611322	0.879	1564	39.213	6.553
LINE	L1	L1Md_T	UID-1222	-	chrX	61339446	61345811	0.898	1153	39.2	6.492
LINE	L1	L1Md_T	UID-16	+	chr1	25590833	25597256	0.919	1989	39.198	7.006
LINE	L1	L1Md_T	UID-353	-	chr5	58399603	58406437	0.917	1387	39.182	6.776
LINE	L1	L1Md_T	UID-1053	-	chr13	33418433	33424650	0.893	1465	39.164	6.859
LINE	L1	L1Md_T	UID-1064	-	chr13	6877792	6884853	0.932	2143	39.162	6.898
LINE	L1	L1Md_T	UID-2238	+	chr6	79372753	79378882	0.877	1524	39.161	6.492
LINE	L1	L1Md_T	UID-690	+	chr3	120104675	120111568	0.877	1352	39.141	6.683
LINE	L1	L1Md_T	UID-1210	-	chrX	72100752	72107385	0.881	1277	39.14	6.822
LINE	L1	L1Md_T	UID-1194	-	chrX	87077858	87084715	0.897	1435	39.133	7.094
LINE	L1	L1Md_T	UID-438	+	chr16	77155260	77161699	0.885	1511	39.122	6.802
LINE	L1	L1Md_T	UID-753	-	chr3	74211248	74217469	0.895	1371	39.118	6.821
LINE	L1	L1Md_T	UID-2002	-	chr14	34702228	34709520	0.914	2440	39.115	7.037
LINE	L1	L1Md_T	UID-889	+	chr15	53574153	53580588	0.848	1105	39.101	6.922
LINE	L1	L1Md_T	UID-1103	+	chr13	77569294	77576140	0.866	1284	39.087	6.958
LINE	L1	L1Md_T	UID-514	+	chr18	15981022	15988283	0.923	2486	39.081	6.958
LINE	L1	L1Md_T	UID-761	-	chr3	63669727	63677000	0.884	2061	39.079	6.43
LINE	L1	L1Md_T	UID-2594	-	chr12	90075465	90082300	0.895	1536	39.078	7.04
LINE	L1	L1Md_T	UID-1307	+	chrX	51729523	51735744	0.9	2824	39.073	6.753
LINE	L1	L1Md_T	UID-252	+	chr5	58724913	58732598	0.861	1744	39.072	6.898
LINE	L1	L1Md_T	UID-2767	+	chr10	104765125	104771514	0.897	2141	39.071	6.615
LINE	L1	L1Md_T	UID-1774	+	chr8	58388335	58395630	0.886	3232	39.066	6.942
LINE	L1	L1Md_T	UID-1957	-	chr14	106300953	106307429	0.881	1301	39.051	6.741
LINE	L1	L1Md_T	UID-1530	-	chr4	66064646	66071282	0.859	1015	39.041	6.807
LINE	L1	L1Md_T	UID-1824	-	chr8	77389212	77395636	0.865	1138	39.036	6.721
LINE	L1	L1Md_T	UID-2454	-	chr7	94389053	94395255	0.9	1435	39.035	6.687
LINE	L1	L1Md_T	UID-917	+	chr11	26732852	26739279	0.853	1336	39.035	6.559
LINE	L1	L1Md_T	UID-2389	+	chr7	52815636	52821888	0.9	998	39.025	6.393
LINE	L1	L1Md_T	UID-911	+	chr11	15778140	15784584	0.873	2110	39.016	6.615
LINE	L1	L1Md_T	UID-1052	-	chr13	34514547	34520950	0.902	1435	39.01	6.797
LINE	L1	L1Md_T	UID-2752	+	chr10	66582211	66589032	0.889	1626	39.008	6.887
LINE	L1	L1Md_T	UID-1742	+	chr8	16216385	16222829	0.908	1590	39.006	6.599
LINE	L1	L1Md_T	UID-2380	+	chr7	20448314	20454756	0.917	2369	39.001	6.928
LINE	L1	L1Md_T	UID-1793	+	chr8	86215994	86222203	0.909	1518	39.001	6.465
LINE	L1	L1Md_T	UID-1835	-	chr8	63068804	63075860	0.92	1035	38.988	6.566
LINE	L1	L1Md_T	UID-2671	-	chr10	65166266	65172629	0.895	1533	38.988	6.882
LINE	L1	L1Md_T	UID-351	-	chr5	59643843	59650266	0.895	1276	38.987	6.947
LINE	L1	L1Md_T	UID-2232	+	chr6	73344394	73351518	0.914	2847	38.969	7.099
LINE	L1	L1Md_T	UID-2279	+	chr9	18155994	18162235	0.909	1615	38.967	6.459
LINE	L1	L1Md_T	UID-1680	-	chr2	90166770	90173389	0.891	1173	38.966	6.721
LINE	L1	L1Md_T	UID-573	-	chr18	83259947	83266417	0.915	1435	38.964	6.902
LINE	L1	L1Md_T	UID-1403	+	chrX	158600807	158607274	0.857	1114	38.964	6.569
LINE	L1	L1Md_T	UID-2526	+	chr12	30991426	30998084	0.9	1718	38.961	6.57
LINE	L1	L1Md_T	UID-2013	-	chr14	9854020	9860464	0.929	2566	38.959	6.471
LINE	L1	L1Md_T	UID-1844	-	chr8	57098398	57105048	0.893	1240	38.958	6.738
LINE	L1	L1Md_T	UID-713	-	chr3	158441745	158448218	0.905	1252	38.953	6.967
LINE	L1	L1Md_T	UID-629	+	chr3	24984672	24990897	0.918	1137	38.941	6.786
LINE	L1	L1Md_T	UID-949	-	chr11	90579154	90585228	0.924	1435	38.94	6.422
LINE	L1	L1Md_T	UID-1588	+	chr2	44359051	44365451	0.866	1780	38.94	6.738
LINE	L1	L1Md_T	UID-554	+	chr18	78861436	78867844	0.856	927	38.939	6.701
LINE	L1	L1Md_T	UID-1065	-	chr13	6819995	6826236	0.9	1392	38.937	6.427
LINE	L1	L1Md_T	UID-289	+	chr5	102408803	102416075	0.917	2181	38.924	7.042
LINE	L1	L1Md_T	UID-2128	-	chr6	67619923	67626347	0.901	1204	38.924	6.931
LINE	L1	L1Md_T	UID-400	+	chr16	25565679	25572314	0.892	1798	38.923	6.594
LINE	L1	L1Md_T	UID-457	-	chr16	88022992	88029830	0.906	2454	38.918	6.959
LINE	L1	L1Md_T	UID-1566	-	chr4	13289886	13296570	0.908	1100	38.909	6.814
LINE	L1	L1Md_T	UID-45	+	chr1	61514244	61521352	0.873	1367	38.906	6.804
LINE	L1	L1Md_T	UID-2061	-	chr17	81347380	81354248	0.92	1435	38.889	6.9
LINE	L1	L1Md_T	UID-550	+	chr18	72506425	72513106	0.884	1559	38.881	6.442
LINE	L1	L1Md_T	UID-2587	-	chr12	95579389	95586041	0.899	1435	38.877	6.98
LINE	L1	L1Md_T	UID-2573	+	chr12	118683415	118690042	0.902	1337	38.866	6.78
LINE	L1	L1Md_T	UID-323	-	chr5	93545674	93557368	0.561	1435	38.861	6.79
LINE	L1	L1Md_T	UID-1336	+	chrX	79819564	79826253	0.869	1444	38.857	6.731
LINE	L1	L1Md_T	UID-1958	-	chr14	104704895	104712436	0.879	1276	38.848	7.049
LINE	L1	L1Md_T	UID-908	+	chr11	11287224	11294496	0.846	1115	38.843	6.496
LINE	L1	L1Md_T	UID-1130	-	chrX	161540882	161547532	0.873	971	38.838	6.485
LINE	L1	L1Md_T	UID-1270	+	chrX	18538438	18545683	0.874	1044	38.828	6.597
LINE	L1	L1Md_T	UID-1527	-	chr4	69714717	69722012	0.843	927	38.828	6.665
LINE	L1	L1Md_T	UID-2200	+	chr6	24673351	24679778	0.913	1208	38.821	6.644
LINE	L1	L1Md_T	UID-362	-	chr5	49537989	49544918	0.921	1461	38.813	6.874
LINE	L1	L1Md_T	UID-2375	+	chr7	15462242	15468476	0.834	1151	38.811	6.785
LINE	L1	L1Md_T	UID-837	-	chr15	45583559	45590599	0.929	1737	38.797	6.826
LINE	L1	L1Md_T	UID-617	+	chr3	11590447	11596903	0.888	1181	38.796	6.763
LINE	L1	L1Md_T	UID-1542	-	chr4	53052109	53059221	0.901	927	38.788	6.697
LINE	L1	L1Md_T	UID-842	-	chr15	39982978	39989460	0.904	1406	38.777	6.868
LINE	L1	L1Md_T	UID-1276	+	chrX	23534812	23541889	0.831	1967	38.774	6.831
LINE	L1	L1Md_T	UID-2359	-	chr9	22725389	22731835	0.847	1399	38.767	6.485
LINE	L1	L1Md_T	UID-505	-	chr16	14809196	14815582	0.899	968	38.759	6.374
LINE	L1	L1Md_T	UID-2492	-	chr7	34040844	34047504	0.907	1772	38.757	6.709
LINE	L1	L1Md_T	UID-2168	-	chr6	20017558	20024275	0.858	946	38.75	6.412
LINE	L1	L1Md_T	UID-1544	-	chr4	51648272	51655000	0.894	1187	38.714	6.818
LINE	L1	L1Md_T	UID-819	-	chr15	62764102	62770444	0.895	1525	38.703	6.667
LINE	L1	L1Md_T	UID-767	-	chr3	58271550	58278195	0.89	1271	38.685	6.721
LINE	L1	L1Md_T	UID-704	+	chr3	139367342	139373574	0.899	927	38.68	6.553
LINE	L1	L1Md_T	UID-2751	+	chr10	66072627	66079301	0.887	1559	38.677	6.439
LINE	L1	L1Md_T	UID-1289	+	chrX	42632953	42639131	0.917	2248	38.662	6.526
LINE	L1	L1Md_T	UID-480	-	chr16	60741323	60748362	0.895	996	38.651	6.493
LINE	L1	L1Md_T	UID-2058	-	chr17	93623523	93629965	0.875	1375	38.651	6.71
LINE	L1	L1Md_T	UID-2307	+	chr9	91618794	91625395	0.903	1727	38.649	6.881
LINE	L1	L1Md_T	UID-743	-	chr3	81361224	81367683	0.891	927	38.646	6.717
LINE	L1	L1Md_T	UID-1575	+	chr2	8037419	8043855	0.882	1500	38.642	6.712
LINE	L1	L1Md_T	UID-962	-	chr11	46759782	46766609	0.893	1261	38.641	6.541
LINE	L1	L1Md_T	UID-1892	+	chr14	35275241	35281513	0.868	2284	38.641	6.786
LINE	L1	L1Md_T	UID-733	-	chr3	111262271	111268662	0.846	1175	38.639	6.845
LINE	L1	L1Md_T	UID-1004	+	chr19	50426271	50433118	0.864	1448	38.631	6.383
LINE	L1	L1Md_T	UID-1741	+	chr8	15652253	15658694	0.84	2414	38.625	6.643
LINE	L1	L1Md_T	UID-1477	+	chr4	103273316	103279734	0.917	1588	38.612	6.62
LINE	L1	L1Md_T	UID-434	+	chr16	73681346	73688213	0.858	1020	38.612	6.632
LINE	L1	L1Md_T	UID-2455	-	chr7	93411516	93418931	0.833	1394	38.606	6.935
LINE	L1	L1Md_T	UID-804	-	chr3	6455869	6462070	0.872	1435	38.599	6.486
LINE	L1	L1Md_T	UID-2117	NA	chr6	90027498	90035878	0.885	881	38.595	7.378
LINE	L1	L1Md_T	UID-1907	+	chr14	56195406	56202253	0.858	1661	38.581	6.66
LINE	L1	L1Md_T	UID-2110	-	chr6	103062344	103068772	0.915	1503	38.576	6.599
LINE	L1	L1Md_T	UID-2271	+	chr9	4182521	4189009	0.863	1172	38.561	6.458
LINE	L1	L1Md_T	UID-1636	+	chr2	154087901	154094361	0.893	1744	38.556	6.805
LINE	L1	L1Md_T	UID-2369	+	chr7	5202619	5209473	0.893	1061	38.551	6.377
LINE	L1	L1Md_T	UID-866	+	chr15	18314524	18320972	0.873	1947	38.548	6.767
LINE	L1	L1Md_T	UID-1054	-	chr13	29249056	29255827	0.869	1225	38.548	6.752
LINE	L1	L1Md_T	UID-143	-	chr1	140642809	140649056	0.873	1414	38.534	6.57
LINE	L1	L1Md_T	UID-2612	-	chr12	52109807	52116449	0.899	1071	38.533	6.773
LINE	L1	L1Md_T	UID-1839	-	chr8	58973026	58979181	0.902	1183	38.531	6.825
LINE	L1	L1Md_T	UID-1954	-	chr14	112426441	112433097	0.879	1225	38.522	6.752
LINE	L1	L1Md_T	UID-1979	-	chr14	68850846	68857001	0.896	1394	38.517	6.658
LINE	L1	L1Md_T	UID-472	-	chr16	70940852	70948204	0.882	866	38.511	6.722
LINE	L1	L1Md_T	UID-591	-	chr18	43710544	43716774	0.906	1461	38.498	6.917
LINE	L1	L1Md_T	UID-1459	+	chr4	76728690	76735307	0.856	1172	38.493	6.7
LINE	L1	L1Md_T	UID-18	+	chr1	27755094	27761315	0.894	1794	38.484	6.562
LINE	L1	L1Md_T	UID-2051	+	chr17	75424139	75430849	0.864	2005	38.483	6.476
LINE	L1	L1Md_T	UID-170	-	chr1	103147775	103154418	0.909	1772	38.48	6.788
LINE	L1	L1Md_T	UID-342	-	chr5	70203988	70210428	0.866	967	38.48	6.653
LINE	L1	L1Md_T	UID-1138	-	chrX	155221323	155228375	0.88	1256	38.474	6.819
LINE	L1	L1Md_T	UID-282	+	chr5	88545882	88553173	0.91	1402	38.461	7.158
LINE	L1	L1Md_T	UID-1100	+	chr13	74705599	74712214	0.894	1878	38.454	6.615
LINE	L1	L1Md_T	UID-1940	+	chr14	124654231	124661280	0.914	1974	38.451	6.89
LINE	L1	L1Md_T	UID-1635	+	chr2	150440392	150447357	0.877	2137	38.446	6.502
LINE	L1	L1Md_T	UID-2617	-	chr12	47578981	47585650	0.92	968	38.434	6.45
LINE	L1	L1Md_T	UID-1876	-	chr8	9351782	9358598	0.88	996	38.419	6.797
LINE	L1	L1Md_T	UID-720	-	chr3	141759956	141766614	0.856	1082	38.409	6.312
LINE	L1	L1Md_T	UID-228	+	chr5	9049288	9055925	0.881	2221	38.408	6.783
LINE	L1	L1Md_T	UID-613	+	chr3	7082889	7089335	0.875	1194	38.391	6.416
LINE	L1	L1Md_T	UID-1697	-	chr2	63368135	63374545	0.908	1490	38.387	6.61
LINE	L1	L1Md_T	UID-1230	-	chrX	58208864	58215530	0.902	1031	38.385	6.751
LINE	L1	L1Md_T	UID-1900	+	chr14	43585841	43592713	0.876	1503	38.382	6.791
LINE	L1	L1Md_T	UID-2182	-	chr6	3814750	3820898	0.89	822	38.377	6.681
LINE	L1	L1Md_T	UID-2519	+	chr12	19626886	19633715	0.887	2433	38.368	6.307
LINE	L1	L1Md_T	UID-2772	+	chr10	106396607	106403025	0.892	2493	38.365	6.393
LINE	L1	L1Md_T	UID-2183	+	chr6	4282293	4288530	0.837	967	38.363	6.112
LINE	L1	L1Md_T	UID-1348	+	chrX	89488084	89494712	0.781	1194	38.352	6.265
LINE	L1	L1Md_T	UID-2724	+	chr10	27254763	27261184	0.894	1851	38.343	6.771
LINE	L1	L1Md_T	UID-2349	-	chr9	38500000	38506279	0.89	1276	38.334	6.752
LINE	L1	L1Md_T	UID-8	+	chr1	18872424	18878654	0.86	1352	38.333	6.326
LINE	L1	L1Md_T	UID-2452	-	chr7	96191518	96198517	0.895	1711	38.332	6.884
LINE	L1	L1Md_T	UID-2438	+	chr7	120506015	120513086	0.899	3023	38.33	6.863
LINE	L1	L1Md_T	UID-2741	+	chr10	48231698	48238172	0.869	1511	38.329	6.364
LINE	L1	L1Md_T	UID-2742	+	chr10	48231698	48238172	0.869	1511	38.329	6.364
LINE	L1	L1Md_T	UID-2070	-	chr17	61084288	61090922	0.898	1227	38.325	6.608
LINE	L1	L1Md_T	UID-869	+	chr15	21262047	21268254	0.869	2772	38.324	6.412
LINE	L1	L1Md_T	UID-1592	+	chr2	54385029	54391940	0.864	1400	38.322	6.264
LINE	L1	L1Md_T	UID-2337	-	chr9	81930396	81937243	0.874	1499	38.32	6.625
LINE	L1	L1Md_T	UID-515	+	chr18	16961907	16968340	0.918	1701	38.317	6.679
LINE	L1	L1Md_T	UID-454	+	chr16	95782496	95788939	0.894	950	38.313	6.546
LINE	L1	L1Md_T	UID-154	-	chr1	118122113	118128838	0.876	1469	38.309	6.337
LINE	L1	L1Md_T	UID-1577	+	chr2	11121221	11128492	0.854	2118	38.308	6.987
LINE	L1	L1Md_T	UID-1888	+	chr14	16974082	16980534	0.916	2353	38.306	6.502
LINE	L1	L1Md_T	UID-1380	+	chrX	122724571	122731816	0.862	2224	38.306	6.939
LINE	L1	L1Md_T	UID-1008	-	chr19	51108521	51115152	0.884	1435	38.305	6.637
LINE	L1	L1Md_T	UID-2149	-	chr6	43988256	43994669	0.918	1034	38.293	6.959
LINE	L1	L1Md_T	UID-2595	-	chr12	87592193	87598793	0.88	3123	38.291	6.383
LINE	L1	L1Md_T	UID-1713	-	chr2	46290797	46297060	0.835	1256	38.276	6.45
LINE	L1	L1Md_T	UID-511	+	chr18	11185874	11192098	0.892	2087	38.275	6.367
LINE	L1	L1Md_T	UID-53	+	chr1	71250559	71256765	0.911	1950	38.253	6.676
LINE	L1	L1Md_T	UID-871	+	chr15	26112631	26119260	0.895	1706	38.249	6.689
LINE	L1	L1Md_T	UID-2468	-	chr7	71818354	71825041	0.924	927	38.243	6.566
LINE	L1	L1Md_T	UID-636	+	chr3	44099256	44106345	0.894	1551	38.243	6.826
LINE	L1	L1Md_T	UID-843	-	chr15	39697350	39703973	0.88	2157	38.241	6.411
LINE	L1	L1Md_T	UID-1518	-	chr4	83637093	83644163	0.889	1028	38.231	7.061
LINE	L1	L1Md_T	UID-1618	+	chr2	101481552	101487953	0.898	1911	38.229	6.83
LINE	L1	L1Md_T	UID-1978	-	chr14	71391846	71398076	0.832	1366	38.228	6.632
LINE	L1	L1Md_T	UID-1124	+	chr13	109409970	109416385	0.886	2054	38.225	6.458
LINE	L1	L1Md_T	UID-848	-	chr15	30216791	30223023	0.871	927	38.224	6.592
LINE	L1	L1Md_T	UID-102	+	chr1	150232434	150239453	0.909	2158	38.222	6.997
LINE	L1	L1Md_T	UID-559	+	chr18	86560559	86567412	0.9	2190	38.216	6.805
LINE	L1	L1Md_T	UID-475	-	chr16	67328231	67334626	0.912	1394	38.211	6.687
LINE	L1	L1Md_T	UID-1934	+	chr14	120061918	120068173	0.883	2169	38.208	6.351
LINE	L1	L1Md_T	UID-1951	-	chr14	114897061	114903931	0.877	1240	38.185	6.592
LINE	L1	L1Md_T	UID-377	-	chr5	22084792	22091215	0.884	874	38.166	6.877
LINE	L1	L1Md_T	UID-1959	-	chr14	103407556	103414030	0.874	1071	38.166	6.607
LINE	L1	L1Md_T	UID-2768	+	chr10	104890254	104896542	0.859	988	38.131	6.332
LINE	L1	L1Md_T	UID-1232	-	chrX	53658498	53664972	0.851	1194	38.129	6.342
LINE	L1	L1Md_T	UID-221	-	chr1	11776815	11783770	0.931	1606	38.112	6.661
LINE	L1	L1Md_T	UID-1143	-	chrX	144222244	144228475	0.905	1461	38.108	6.826
LINE	L1	L1Md_T	UID-2054	+	chr17	81716416	81722813	0.897	998	38.098	6.749
LINE	L1	L1Md_T	UID-734	-	chr3	110676816	110683179	0.839	1244	38.098	6.435
LINE	L1	L1Md_T	UID-982	-	chr11	10879283	10885522	0.827	927	38.089	6.59
LINE	L1	L1Md_T	UID-1478	+	chr4	104262776	104269031	0.874	2110	38.086	6.672
LINE	L1	L1Md_T	UID-1057	-	chr13	26239333	26246002	0.881	1054	38.077	6.565
LINE	L1	L1Md_T	UID-1986	-	chr14	56992146	56998780	0.882	1093	38.071	6.775
LINE	L1	L1Md_T	UID-1534	-	chr4	64287358	64293993	0.85	1017	38.069	6.276
LINE	L1	L1Md_T	UID-579	-	chr18	68475251	68481881	0.883	1140	38.053	6.882
LINE	L1	L1Md_T	UID-1092	+	chr13	60855841	60862504	0.929	1795	38.051	6.809
LINE	L1	L1Md_T	UID-1082	+	chr13	26521878	26528110	0.912	2403	38.05	6.24
LINE	L1	L1Md_T	UID-1285	+	chrX	39331853	39338698	0.871	1193	38.043	6.745
LINE	L1	L1Md_T	UID-1246	-	chrX	39661195	39667609	0.884	1211	38.036	6.752
LINE	L1	L1Md_T	UID-2291	+	chr9	52749729	52756141	0.879	1129	38.009	6.589
LINE	L1	L1Md_T	UID-847	-	chr15	30441430	30448063	0.899	1276	38.006	6.337
LINE	L1	L1Md_T	UID-2497	-	chr7	21070284	21077071	0.886	1119	38.005	6.31
LINE	L1	L1Md_T	UID-646	+	chr3	56903891	56910335	0.858	1665	38.004	6.651
LINE	L1	L1Md_T	UID-367	-	chr5	42005818	42012662	0.871	1248	37.98	6.927
LINE	L1	L1Md_T	UID-2644	-	chr10	119281147	119287750	0.922	1599	37.977	6.713
LINE	L1	L1Md_T	UID-2593	-	chr12	90834883	90841423	0.843	1023	37.957	6.536
LINE	L1	L1Md_T	UID-1555	-	chr4	22535907	22542341	0.931	1435	37.949	6.528
LINE	L1	L1Md_T	UID-1229	-	chrX	58257243	58263663	0.875	878	37.933	6.768
LINE	L1	L1Md_T	UID-442	+	chr16	81859207	81865651	0.902	2112	37.931	6.597
LINE	L1	L1Md_T	UID-134	-	chr1	158642586	158648799	0.867	1347	37.925	6.658
LINE	L1	L1Md_T	UID-1512	-	chr4	90971166	90977953	0.899	1190	37.91	6.53
LINE	L1	L1Md_T	UID-1580	+	chr2	19581385	19588247	0.885	2650	37.907	6.904
LINE	L1	L1Md_T	UID-1373	+	chrX	113351889	113358269	0.916	1363	37.903	6.5
LINE	L1	L1Md_T	UID-653	+	chr3	61720098	61726534	0.878	703	37.901	6.667
LINE	L1	L1Md_T	UID-588	-	chr18	46686506	46692928	0.908	1248	37.898	6.411
LINE	L1	L1Md_T	UID-978	-	chr11	17511837	17518391	0.883	1423	37.898	6.823
LINE	L1	L1Md_T	UID-334	-	chr5	81701933	81708353	0.897	929	37.894	6.385
LINE	L1	L1Md_T	UID-2240	+	chr6	82625599	82632263	0.908	2081	37.875	6.609
LINE	L1	L1Md_T	UID-1992	-	chr14	43662332	43669108	0.86	1568	37.86	6.519
LINE	L1	L1Md_T	UID-2619	-	chr12	43343312	43349785	0.88	1225	37.855	6.23
LINE	L1	L1Md_T	UID-167	-	chr1	105013761	105021026	0.892	1101	37.847	6.669
LINE	L1	L1Md_T	UID-879	+	chr15	43593093	43599331	0.933	985	37.844	6.392
LINE	L1	L1Md_T	UID-1785	+	chr8	74191067	74197488	0.893	2231	37.843	6.686
LINE	L1	L1Md_T	UID-1388	+	chrX	139382954	139389349	0.897	1387	37.838	6.19
LINE	L1	L1Md_T	UID-407	+	chr16	35442359	35448725	0.875	1907	37.83	6.479
LINE	L1	L1Md_T	UID-1601	+	chr2	64312597	64319593	0.834	1082	37.829	6.34
LINE	L1	L1Md_T	UID-1428	+	chr4	18606846	18613724	0.852	1989	37.817	6.612
LINE	L1	L1Md_T	UID-1213	-	chrX	69629566	69636418	0.914	1253	37.803	6.935
LINE	L1	L1Md_T	UID-1086	+	chr13	40587647	40594100	0.926	1395	37.796	6.314
LINE	L1	L1Md_T	UID-1430	+	chr4	19190051	19196645	0.853	1423	37.795	6.241
LINE	L1	L1Md_T	UID-1984	-	chr14	59980778	59987030	0.901	1124	37.789	6.072
LINE	L1	L1Md_T	UID-1613	+	chr2	90087391	90094381	0.873	1058	37.788	6.472
LINE	L1	L1Md_T	UID-2137	-	chr6	62988898	62995310	0.888	1179	37.783	6.438
LINE	L1	L1Md_T	UID-2451	-	chr7	97140955	97147381	0.888	1174	37.778	6.613
LINE	L1	L1Md_T	UID-161	-	chr1	112214102	112220737	0.898	876	37.77	6.638
LINE	L1	L1Md_T	UID-2413	+	chr7	74799316	74806206	0.864	1815	37.77	6.607
LINE	L1	L1Md_T	UID-2551	+	chr12	63691565	63698223	0.886	1045	37.768	6.118
LINE	L1	L1Md_T	UID-26	+	chr1	40195115	40201603	0.926	2788	37.749	6.636
LINE	L1	L1Md_T	UID-1026	-	chr13	103566328	103572962	0.907	1599	37.746	6.416
LINE	L1	L1Md_T	UID-1350	+	chrX	92943421	92950108	0.89	1290	37.72	6.973
LINE	L1	L1Md_T	UID-2580	-	chr12	102406085	102412775	0.876	1447	37.716	6.55
LINE	L1	L1Md_T	UID-681	+	chr3	110057288	110063982	0.905	2885	37.699	6.125
LINE	L1	L1Md_T	UID-723	-	chr3	133635939	133642789	0.895	927	37.695	6.976
LINE	L1	L1Md_T	UID-2035	+	chr17	50926831	50933194	0.916	1061	37.691	6.769
LINE	L1	L1Md_T	UID-2196	+	chr6	21393956	21400845	0.854	935	37.687	6.276
LINE	L1	L1Md_T	UID-1116	+	chr13	91815180	91821603	0.919	1827	37.679	6.366
LINE	L1	L1Md_T	UID-2738	+	chr10	45838957	45845409	0.929	1616	37.668	6.596
LINE	L1	L1Md_T	UID-2488	-	chr7	48297949	48305191	0.877	927	37.666	6.954
LINE	L1	L1Md_T	UID-1473	+	chr4	93703730	93710152	0.828	1086	37.663	6.634
LINE	L1	L1Md_T	UID-1541	-	chr4	53386840	53393103	0.874	1394	37.662	6.78
LINE	L1	L1Md_T	UID-1022	-	chr13	108790113	108796540	0.91	875	37.644	6.676
LINE	L1	L1Md_T	UID-1132	-	chrX	160653359	160659607	0.904	996	37.644	6.298
LINE	L1	L1Md_T	UID-2340	-	chr9	71965016	71972230	0.921	927	37.623	7.122
LINE	L1	L1Md_T	UID-1728	-	chr2	17042644	17048835	0.896	1369	37.617	6.232
LINE	L1	L1Md_T	UID-140	-	chr1	145469918	145476169	0.901	1430	37.61	6.466
LINE	L1	L1Md_T	UID-2012	-	chr14	10101451	10107893	0.858	1278	37.609	6.58
LINE	L1	L1Md_T	UID-2302	+	chr9	79254471	79261585	0.916	1920	37.605	6.582
LINE	L1	L1Md_T	UID-60	+	chr1	83819612	83825846	0.92	2822	37.602	6.433
LINE	L1	L1Md_T	UID-1560	-	chr4	18421978	18428423	0.921	1234	37.596	6.356
LINE	L1	L1Md_T	UID-310	-	chr5	105087103	105093773	0.892	1165	37.577	6.691
LINE	L1	L1Md_T	UID-408	+	chr16	41575052	41582566	0.884	1016	37.567	6.784
LINE	L1	L1Md_T	UID-1015	-	chr19	20748920	20755379	0.858	972	37.55	6.219
LINE	L1	L1Md_T	UID-2731	+	chr10	33821496	33827947	0.907	2211	37.51	6.632
LINE	L1	L1Md_T	UID-392	+	chr16	11859640	11866480	0.908	1543	37.506	6.757
LINE	L1	L1Md_T	UID-2469	-	chr7	70677984	70684642	0.895	927	37.492	6.652
LINE	L1	L1Md_T	UID-1637	+	chr2	159346119	159352587	0.894	803	37.491	6.499
LINE	L1	L1Md_T	UID-1021	-	chr13	109366198	109372893	0.896	927	37.487	6.494
LINE	L1	L1Md_T	UID-2427	+	chr7	102833307	102839518	0.893	914	37.479	6.475
LINE	L1	L1Md_T	UID-84	+	chr1	125134709	125141153	0.884	1394	37.474	6.608
LINE	L1	L1Md_T	UID-612	+	chr3	6849967	6856433	0.9	1684	37.443	6.558
LINE	L1	L1Md_T	UID-2049	+	chr17	70323657	70330072	0.896	2534	37.432	6.648
LINE	L1	L1Md_T	UID-2624	-	chr12	35902804	35909050	0.869	1405	37.431	6.155
LINE	L1	L1Md_T	UID-1145	-	chrX	142708853	142715131	0.907	1096	37.406	6.523
LINE	L1	L1Md_T	UID-2009	-	chr14	15088167	15094159	0.862	806	37.401	6.535
LINE	L1	L1Md_T	UID-822	-	chr15	60409584	60416075	0.908	1364	37.394	6.235
LINE	L1	L1Md_T	UID-1933	+	chr14	117258222	117264648	0.909	2268	37.385	6.347
LINE	L1	L1Md_T	UID-2635	-	chr12	13991403	13998469	0.92	1382	37.384	6.548
LINE	L1	L1Md_T	UID-1255	-	chrX	21238942	21246066	0.885	1015	37.376	7.156
LINE	L1	L1Md_T	UID-1450	+	chr4	66355024	66362124	0.856	927	37.375	6.318
LINE	L1	L1Md_T	UID-1709	-	chr2	47663441	47670056	0.869	1333	37.371	6.463
LINE	L1	L1Md_T	UID-1813	-	chr8	98284043	98290084	0.889	1245	37.367	6.101
LINE	L1	L1Md_T	UID-1120	+	chr13	100981381	100987318	0.902	1977	37.361	6.204
LINE	L1	L1Md_T	UID-2050	+	chr17	75399256	75405619	0.894	2359	37.354	6.853
LINE	L1	L1Md_T	UID-2030	+	chr17	38890721	38897402	0.88	1015	37.31	6.487
LINE	L1	L1Md_T	UID-1204	-	chrX	76701434	76707521	0.888	924	37.291	6.194
LINE	L1	L1Md_T	UID-305	-	chr5	131500877	131507300	0.886	900	37.289	6.341
LINE	L1	L1Md_T	UID-1725	-	chr2	22158454	22165523	0.898	1302	37.278	6.323
LINE	L1	L1Md_T	UID-909	+	chr11	13379104	13385743	0.869	1046	37.244	6.374
LINE	L1	L1Md_T	UID-352	-	chr5	58933406	58939820	0.871	927	37.194	6.426
LINE	L1	L1Md_T	UID-607	+	chr3	4584515	4591388	0.837	927	37.194	6.189
LINE	L1	L1Md_T	UID-29	+	chr1	44480455	44487744	0.876	1086	37.191	6.681
LINE	L1	L1Md_T	UID-1673	-	chr2	98190159	98196389	0.876	1205	37.184	6.313
LINE	L1	L1Md_T	UID-363	-	chr5	48638072	48644299	0.913	1392	37.171	6.32
LINE	L1	L1Md_T	UID-2689	-	chr10	37701743	37708606	0.896	1086	37.169	6.622
LINE	L1	L1Md_T	UID-87	+	chr1	130491092	130497715	0.871	2189	37.165	6.37
LINE	L1	L1Md_T	UID-184	-	chr1	75707807	75715492	0.915	1730	37.159	7.374
LINE	L1	L1Md_T	UID-499	-	chr16	41054275	41060891	0.865	1219	37.157	6.531
LINE	L1	L1Md_T	UID-2195	+	chr6	19145462	19152797	0.886	927	37.156	6.324
LINE	L1	L1Md_T	UID-1061	-	chr13	16385219	16392064	0.898	1255	37.14	6.031
LINE	L1	L1Md_T	UID-329	-	chr5	88605594	88612311	0.884	1383	37.136	6.46
LINE	L1	L1Md_T	UID-2114	-	chr6	96290664	96297108	0.915	1235	37.123	6.551
LINE	L1	L1Md_T	UID-1223	-	chrX	61259188	61266477	0.898	1455	37.107	6.846
LINE	L1	L1Md_T	UID-2496	-	chr7	21823968	21830064	0.941	1435	37.103	6.579
LINE	L1	L1Md_T	UID-2495	-	chr7	23047157	23053253	0.941	1435	37.103	6.579
LINE	L1	L1Md_T	UID-1971	-	chr14	79828785	79836309	0.924	1599	37.092	6.843
LINE	L1	L1Md_T	UID-2423	+	chr7	87902577	87909848	0.864	1430	37.091	6.708
LINE	L1	L1Md_T	UID-1737	-	chr2	7915822	7922255	0.906	1463	37.088	6.442
LINE	L1	L1Md_T	UID-1925	+	chr14	106963962	106971323	0.874	1202	37.085	6.262
LINE	L1	L1Md_T	UID-1863	-	chr8	28964354	28971202	0.864	1160	37.066	6.508
LINE	L1	L1Md_T	UID-1655	-	chr2	125405206	125411636	0.907	1435	37.063	6.253
LINE	L1	L1Md_T	UID-937	+	chr11	64299146	64305983	0.904	1255	37.049	6.103
LINE	L1	L1Md_T	UID-2274	+	chr9	11722529	11728781	0.872	1737	37.047	6.061
LINE	L1	L1Md_T	UID-384	-	chr5	16066375	16073178	0.854	927	37.042	6.231
LINE	L1	L1Md_T	UID-1936	+	chr14	123609335	123615644	0.888	1409	37.032	6.077
LINE	L1	L1Md_T	UID-1243	-	chrX	41305092	41311494	0.895	1336	37.016	6.652
LINE	L1	L1Md_T	UID-1625	+	chr2	116454305	116460516	0.92	2617	37.01	6.717
LINE	L1	L1Md_T	UID-2043	+	chr17	61947977	61954423	0.914	752	37.005	6.648
LINE	L1	L1Md_T	UID-2084	-	chr17	18601652	18608082	0.845	927	37	6.366
LINE	L1	L1Md_T	UID-1007	-	chr19	51949136	51955753	0.912	1125	36.999	6.36
LINE	L1	L1Md_T	UID-562	-	chr18	90464137	90471202	0.918	1465	36.995	6.442
LINE	L1	L1Md_T	UID-2646	-	chr10	112865991	112872411	0.891	1552	36.984	6.618
LINE	L1	L1Md_T	UID-2306	+	chr9	87815165	87821603	0.921	1429	36.973	6.309
LINE	L1	L1Md_T	UID-1362	+	chrX	104622644	104629034	0.931	1537	36.972	6.481
LINE	L1	L1Md_T	UID-1346	+	chrX	87838513	87845230	0.883	1183	36.971	6.366
LINE	L1	L1Md_T	UID-145	-	chr1	139116498	139122778	0.865	1394	36.965	6.191
LINE	L1	L1Md_T	UID-2802	+	chrY	3915292	3921360	0.907	1455	36.949	6.243
LINE	L1	L1Md_T	UID-679	+	chr3	102832666	102839334	0.871	1716	36.949	6.753
LINE	L1	L1Md_T	UID-2711	+	chr10	10026736	10033380	0.885	2681	36.943	6.558
LINE	L1	L1Md_T	UID-969	-	chr11	38247077	38254156	0.86	1414	36.942	6.743
LINE	L1	L1Md_T	UID-1244	-	chrX	41174113	41180997	0.869	1163	36.94	6.802
LINE	L1	L1Md_T	UID-497	-	chr16	43136715	43143256	0.86	1134	36.937	6.474
LINE	L1	L1Md_T	UID-1634	+	chr2	149185052	149191248	0.904	1863	36.923	6.451
LINE	L1	L1Md_T	UID-225	+	chr5	8266601	8272795	0.881	1192	36.854	6.208
LINE	L1	L1Md_T	UID-854	-	chr15	22684115	22690363	0.852	1144	36.854	6.446
LINE	L1	L1Md_T	UID-428	+	chr16	69208673	69215553	0.898	1397	36.848	6.609
LINE	L1	L1Md_T	UID-705	+	chr3	140156619	140163506	0.861	1398	36.848	6.289
LINE	L1	L1Md_T	UID-1879	+	chr14	10112275	10118477	0.851	1176	36.846	6.52
LINE	L1	L1Md_T	UID-456	-	chr16	95011083	95017292	0.871	927	36.832	6.073
LINE	L1	L1Md_T	UID-1850	-	chr8	45421991	45428439	0.895	1599	36.831	6.567
LINE	L1	L1Md_T	UID-1098	+	chr13	71491645	71498113	0.849	2247	36.825	6.292
LINE	L1	L1Md_T	UID-856	-	chr15	20316568	20323415	0.886	1224	36.816	6.583
LINE	L1	L1Md_T	UID-1724	-	chr2	29298334	29305333	0.922	1276	36.785	6.23
LINE	L1	L1Md_T	UID-205	-	chr1	33013355	33020205	0.89	2355	36.751	6.424
LINE	L1	L1Md_T	UID-322	-	chr5	94039766	94047473	0.893	1435	36.722	6.863
LINE	L1	L1Md_T	UID-2116	-	chr6	95210189	95216605	0.892	1132	36.712	6.352
LINE	L1	L1Md_T	UID-1708	-	chr2	49475331	49481580	0.913	1028	36.709	6.649
LINE	L1	L1Md_T	UID-1003	+	chr19	49523287	49529751	0.869	2144	36.709	6.451
LINE	L1	L1Md_T	UID-1423	+	chr4	16545274	16552094	0.894	1800	36.702	6.544
LINE	L1	L1Md_T	UID-2755	+	chr10	78940536	78946965	0.867	1185	36.693	6.242
LINE	L1	L1Md_T	UID-2543	+	chr12	55632615	55639683	0.914	2066	36.683	6.829
LINE	L1	L1Md_T	UID-382	-	chr5	17033012	17039659	0.871	927	36.675	6.272
LINE	L1	L1Md_T	UID-2442	-	chr7	125009759	125016663	0.901	2013	36.666	6.303
LINE	L1	L1Md_T	UID-2056	+	chr17	89440580	89446983	0.879	1691	36.662	6.279
LINE	L1	L1Md_T	UID-634	+	chr3	43186658	43192780	0.884	2283	36.647	6.032
LINE	L1	L1Md_T	UID-2090	-	chr6	147897116	147904382	0.894	1062	36.64	6.663
LINE	L1	L1Md_T	UID-2329	-	chr9	91634441	91640860	0.903	1203	36.626	6.475
LINE	L1	L1Md_T	UID-645	+	chr3	56513603	56520251	0.915	1436	36.623	6.604
LINE	L1	L1Md_T	UID-72	+	chr1	107822786	107829913	0.89	2249	36.601	6.205
LINE	L1	L1Md_T	UID-155	-	chr1	116855476	116862552	0.885	2698	36.594	6.391
LINE	L1	L1Md_T	UID-1314	+	chrX	62617039	62623273	0.862	1212	36.587	6.72
LINE	L1	L1Md_T	UID-1596	+	chr2	55941376	55947802	0.902	2489	36.58	6.307
LINE	L1	L1Md_T	UID-1496	-	chr4	111929712	111936295	0.867	804	36.568	6.351
LINE	L1	L1Md_T	UID-914	+	chr11	21906987	21913425	0.891	922	36.563	6.217
LINE	L1	L1Md_T	UID-1102	+	chr13	77537829	77544501	0.89	2159	36.559	6.614
LINE	L1	L1Md_T	UID-1472	+	chr4	92985634	92992761	0.876	1054	36.546	6.243
LINE	L1	L1Md_T	UID-1332	+	chrX	76362076	76369334	0.88	927	36.527	6.747
LINE	L1	L1Md_T	UID-1521	-	chr4	77973384	77980038	0.908	1233	36.517	6.06
LINE	L1	L1Md_T	UID-240	+	chr5	29176737	29183372	0.906	1722	36.499	6.4
LINE	L1	L1Md_T	UID-632	+	chr3	40151275	40157638	0.91	1409	36.495	6.641
LINE	L1	L1Md_T	UID-2055	+	chr17	82464101	82470750	0.861	927	36.486	6.165
LINE	L1	L1Md_T	UID-808	-	chr3	4164195	4170853	0.86	927	36.486	6.146
LINE	L1	L1Md_T	UID-2161	-	chr6	25105126	25111797	0.858	927	36.486	6.165
LINE	L1	L1Md_T	UID-2197	+	chr6	22125161	22131827	0.843	927	36.474	6.058
LINE	L1	L1Md_T	UID-1809	-	chr8	102141497	102148583	0.895	1443	36.461	6.586
LINE	L1	L1Md_T	UID-272	+	chr5	72542359	72548457	0.935	1435	36.455	6.405
LINE	L1	L1Md_T	UID-1248	-	chrX	35501869	35508901	0.873	2215	36.447	5.813
LINE	L1	L1Md_T	UID-1247	-	chrX	35501869	35508901	0.873	2215	36.447	5.813
LINE	L1	L1Md_T	UID-1470	+	chr4	90979432	90986744	0.905	1258	36.432	6.605
LINE	L1	L1Md_T	UID-2615	-	chr12	48842958	48849596	0.913	1697	36.408	6.175
LINE	L1	L1Md_T	UID-2346	-	chr9	51613665	51620462	0.889	1435	36.408	6.554
LINE	L1	L1Md_T	UID-885	+	chr15	50364462	50370600	0.898	1597	36.4	6.475
LINE	L1	L1Md_T	UID-257	+	chr5	61212945	61219366	0.896	1387	36.393	5.963
LINE	L1	L1Md_T	UID-1292	+	chrX	44043444	44050018	0.884	1742	36.374	6.155
LINE	L1	L1Md_T	UID-326	-	chr5	90812483	90819330	0.859	1245	36.349	6.482
LINE	L1	L1Md_T	UID-1895	+	chr14	40097024	40104116	0.878	1242	36.315	6.249
LINE	L1	L1Md_T	UID-56	+	chr1	76459994	76466421	0.875	1546	36.315	6.206
LINE	L1	L1Md_T	UID-379	-	chr5	18980996	18987281	0.909	1235	36.296	5.918
LINE	L1	L1Md_T	UID-2484	-	chr7	50523725	50530579	0.84	1245	36.288	6.036
LINE	L1	L1Md_T	UID-2559	+	chr12	74926530	74933437	0.904	3188	36.281	6.436
LINE	L1	L1Md_T	UID-2148	-	chr6	44413905	44420547	0.905	1592	36.277	6.454
LINE	L1	L1Md_T	UID-2176	-	chr6	11742584	11749447	0.905	1536	36.259	6.369
LINE	L1	L1Md_T	UID-797	-	chr3	17974702	17981589	0.905	1061	36.22	6.901
LINE	L1	L1Md_T	UID-1674	-	chr2	96954687	96961006	0.893	1160	36.214	6.151
LINE	L1	L1Md_T	UID-1870	-	chr8	23831030	23837456	0.926	1596	36.2	6.28
LINE	L1	L1Md_T	UID-711	+	chr3	158987870	158994315	0.866	1532	36.191	6.049
LINE	L1	L1Md_T	UID-2226	+	chr6	66766120	66772543	0.871	1247	36.186	6.22
LINE	L1	L1Md_T	UID-1156	-	chrX	128596018	128602423	0.873	2417	36.185	6.242
LINE	L1	L1Md_T	UID-316	-	chr5	97519709	97526174	0.906	1249	36.182	6.187
LINE	L1	L1Md_T	UID-2396	+	chr7	58100524	58107068	0.845	1557	36.18	6.589
LINE	L1	L1Md_T	UID-689	+	chr3	118713769	118720180	0.913	3023	36.174	6.388
LINE	L1	L1Md_T	UID-1885	+	chr14	16110602	16117247	0.924	1884	36.157	6.387
LINE	L1	L1Md_T	UID-1425	+	chr4	17408775	17415606	0.9	1414	36.155	6.254
LINE	L1	L1Md_T	UID-429	+	chr16	69892922	69899596	0.847	913	36.155	6.322
LINE	L1	L1Md_T	UID-39	+	chr1	54026204	54032415	0.852	1663	36.153	6.192
LINE	L1	L1Md_T	UID-2779	+	chr10	112425088	112431926	0.887	2626	36.127	6.429
LINE	L1	L1Md_T	UID-93	+	chr1	143862095	143868768	0.871	2885	36.124	6.576
LINE	L1	L1Md_T	UID-2669	-	chr10	65656997	65663648	0.842	761	36.115	6.155
LINE	L1	L1Md_T	UID-443	+	chr16	82507624	82514155	0.892	2085	36.111	6.274
LINE	L1	L1Md_T	UID-620	+	chr3	15079480	15085687	0.915	1107	36.109	6.253
LINE	L1	L1Md_T	UID-2565	+	chr12	95340538	95347014	0.9	2211	36.102	6.129
LINE	L1	L1Md_T	UID-673	+	chr3	81616429	81622912	0.877	1496	36.084	6.177
LINE	L1	L1Md_T	UID-661	+	chr3	66902413	66908615	0.867	1027	36.074	5.649
LINE	L1	L1Md_T	UID-373	-	chr5	29349520	29356677	0.89	1435	36.065	6.411
LINE	L1	L1Md_T	UID-1435	+	chr4	24295337	24301548	0.839	927	36.05	6.335
LINE	L1	L1Md_T	UID-389	-	chr5	6736016	6742465	0.883	967	36.045	6.023
LINE	L1	L1Md_T	UID-2223	+	chr6	65215334	65222204	0.907	2632	36.044	6.791
LINE	L1	L1Md_T	UID-1889	+	chr14	17025515	17032150	0.915	1994	36.026	6.329
LINE	L1	L1Md_T	UID-2714	+	chr10	11856240	11862467	0.863	1800	36.009	5.936
LINE	L1	L1Md_T	UID-2715	+	chr10	11856240	11862467	0.863	1800	36.009	5.936
LINE	L1	L1Md_T	UID-1265	-	chrX	5323539	5329934	0.809	1186	35.988	6.266
LINE	L1	L1Md_T	UID-2658	-	chr10	96505821	96512234	0.891	838	35.987	6.266
LINE	L1	L1Md_T	UID-585	-	chr18	50261968	50268388	0.882	1405	35.976	5.868
LINE	L1	L1Md_T	UID-567	-	chr18	86201393	86208200	0.843	1054	35.975	6.25
LINE	L1	L1Md_T	UID-386	-	chr5	14395510	14401931	0.851	927	35.972	6.165
LINE	L1	L1Md_T	UID-695	+	chr3	125902803	125908919	0.917	2695	35.965	6.246
LINE	L1	L1Md_T	UID-841	-	chr15	42644436	42651088	0.92	1573	35.948	6.45
LINE	L1	L1Md_T	UID-2679	-	chr10	52760974	52767200	0.902	1043	35.942	6.179
LINE	L1	L1Md_T	UID-500	-	chr16	39889373	39895674	0.899	927	35.941	6.046
LINE	L1	L1Md_T	UID-2574	-	chr12	119513668	119520745	0.851	1128	35.935	6.385
LINE	L1	L1Md_T	UID-1765	+	chr8	51346641	51353507	0.903	905	35.934	6.495
LINE	L1	L1Md_T	UID-1650	-	chr2	138389104	138395517	0.92	1435	35.927	6.194
LINE	L1	L1Md_T	UID-541	+	chr18	52876284	52883069	0.848	1069	35.915	6.448
LINE	L1	L1Md_T	UID-285	+	chr5	93804295	93810728	0.91	3001	35.911	6.425
LINE	L1	L1Md_T	UID-1901	+	chr14	44233309	44239311	0.886	1887	35.89	6.078
LINE	L1	L1Md_T	UID-2316	+	chr9	114283433	114289911	0.888	2577	35.852	6.287
LINE	L1	L1Md_T	UID-2213	+	chr6	46577137	46583600	0.903	1382	35.842	6.242
LINE	L1	L1Md_T	UID-320	-	chr5	95705602	95713097	0.882	1443	35.818	6.645
LINE	L1	L1Md_T	UID-2507	-	chr7	5153150	5159323	0.925	1209	35.776	6.409
LINE	L1	L1Md_T	UID-610	+	chr3	6297411	6313572	0.795	1220	35.769	7.707
LINE	L1	L1Md_T	UID-401	+	chr16	26866449	26873595	0.89	2552	35.744	6.411
LINE	L1	L1Md_T	UID-2286	+	chr9	39443237	39449639	0.895	1888	35.712	6.488
LINE	L1	L1Md_T	UID-2174	-	chr6	11963390	11970017	0.896	1801	35.697	6.542
LINE	L1	L1Md_T	UID-1882	+	chr14	13693704	13700742	0.879	2384	35.681	6.382
LINE	L1	L1Md_T	UID-896	+	chr15	65737568	65744405	0.9	1509	35.679	6.441
LINE	L1	L1Md_T	UID-2606	-	chr12	63041825	63048296	0.801	929	35.654	5.947
LINE	L1	L1Md_T	UID-1131	-	chrX	161056328	161062748	0.857	935	35.653	6.016
LINE	L1	L1Md_T	UID-850	-	chr15	29463896	29470340	0.843	1003	35.652	6.239
LINE	L1	L1Md_T	UID-278	+	chr5	82906865	82913559	0.868	2348	35.631	6.438
LINE	L1	L1Md_T	UID-1514	-	chr4	90553808	90560247	0.901	1248	35.616	6.39
LINE	L1	L1Md_T	UID-40	+	chr1	54387178	54393703	0.917	927	35.597	6.59
LINE	L1	L1Md_T	UID-199	-	chr1	48225211	48231889	0.862	1210	35.595	6
LINE	L1	L1Md_T	UID-2721	+	chr10	16692110	16698633	0.901	954	35.583	5.999
LINE	L1	L1Md_T	UID-2416	+	chr7	77875038	77881488	0.863	1290	35.579	6.635
LINE	L1	L1Md_T	UID-80	+	chr1	122086419	122093060	0.877	2235	35.568	6.297
LINE	L1	L1Md_T	UID-1837	-	chr8	62156445	62162908	0.869	761	35.564	6.05
LINE	L1	L1Md_T	UID-2250	+	chr6	101007493	101014077	0.88	1428	35.553	6.227
LINE	L1	L1Md_T	UID-1511	-	chr4	91183735	91190050	0.889	1230	35.552	5.818
LINE	L1	L1Md_T	UID-1924	+	chr14	104121715	104128133	0.877	1519	35.548	6.271
LINE	L1	L1Md_T	UID-1174	-	chrX	109369028	109375220	0.886	1187	35.547	6.059
LINE	L1	L1Md_T	UID-835	-	chr15	46189106	46195257	0.903	1316	35.541	6.264
LINE	L1	L1Md_T	UID-275	+	chr5	79032871	79039295	0.908	1994	35.538	6.136
LINE	L1	L1Md_T	UID-2314	+	chr9	112958857	112965714	0.907	3053	35.532	6.309
LINE	L1	L1Md_T	UID-2315	+	chr9	112958857	112965714	0.907	3053	35.532	6.309
LINE	L1	L1Md_T	UID-568	-	chr18	85319034	85325447	0.852	1192	35.532	6.491
LINE	L1	L1Md_T	UID-2365	-	chr9	9538717	9545352	0.874	1804	35.414	6.701
LINE	L1	L1Md_T	UID-1396	+	chrX	152523615	152530468	0.911	1984	35.401	5.914
LINE	L1	L1Md_T	UID-2154	-	chr6	40535460	40541902	0.906	1324	35.398	6.281
LINE	L1	L1Md_T	UID-2600	-	chr12	71589638	71596270	0.908	1567	35.386	6.34
LINE	L1	L1Md_T	UID-2764	+	chr10	103867509	103873727	0.898	1379	35.343	6.508
LINE	L1	L1Md_T	UID-1157	-	chrX	127725184	127731777	0.856	1013	35.324	5.8
LINE	L1	L1Md_T	UID-2723	+	chr10	23631659	23638072	0.939	1744	35.311	6.28
LINE	L1	L1Md_T	UID-420	+	chr16	53824938	53832291	0.898	920	35.298	6.801
LINE	L1	L1Md_T	UID-2568	+	chr12	97037233	97044300	0.887	1679	35.297	6.169
LINE	L1	L1Md_T	UID-1711	-	chr2	47122854	47129479	0.886	1046	35.291	5.892
LINE	L1	L1Md_T	UID-28	+	chr1	42334669	42341028	0.905	1631	35.28	6.281
LINE	L1	L1Md_T	UID-2074	-	chr17	57652165	57659299	0.902	876	35.279	6.22
LINE	L1	L1Md_T	UID-2109	-	chr6	104257159	104264421	0.897	920	35.273	6.778
LINE	L1	L1Md_T	UID-37	+	chr1	50329971	50336394	0.884	2379	35.26	6.263
LINE	L1	L1Md_T	UID-2180	-	chr6	7481353	7487794	0.85	868	35.243	5.735
LINE	L1	L1Md_T	UID-2026	+	chr17	36707322	36714201	0.922	1237	35.222	6.54
LINE	L1	L1Md_T	UID-2536	+	chr12	42332153	42338406	0.896	2275	35.215	6.286
LINE	L1	L1Md_T	UID-2449	-	chr7	108020460	108028095	0.855	1240	35.207	5.935
LINE	L1	L1Md_T	UID-2513	+	chr12	9626730	9633192	0.879	1734	35.203	6.125
LINE	L1	L1Md_T	UID-58	+	chr1	81419668	81426665	0.822	2330	35.202	6.03
LINE	L1	L1Md_T	UID-2623	-	chr12	36336150	36343042	0.877	1323	35.169	6.48
LINE	L1	L1Md_T	UID-686	+	chr3	117029981	117036469	0.899	2793	35.141	6.248
LINE	L1	L1Md_T	UID-22	+	chr1	30853681	30859934	0.886	2027	35.11	6.01
LINE	L1	L1Md_T	UID-261	+	chr5	62427513	62433974	0.891	1945	35.095	6.357
LINE	L1	L1Md_T	UID-463	-	chr16	79728629	79735079	0.912	1435	35.094	6.354
LINE	L1	L1Md_T	UID-2033	+	chr17	40965349	40971984	0.884	2086	35.084	6.25
LINE	L1	L1Md_T	UID-490	-	chr16	51968138	51974551	0.889	1456	35.072	6.133
LINE	L1	L1Md_T	UID-654	+	chr3	62122233	62128462	0.828	713	35.049	6.116
LINE	L1	L1Md_T	UID-1377	+	chrX	118200010	118206433	0.859	936	35.024	6.212
LINE	L1	L1Md_T	UID-1648	-	chr2	141899331	141905699	0.902	1435	35.015	6.191
LINE	L1	L1Md_T	UID-2693	-	chr10	32965977	32972694	0.874	1361	35.011	6.206
LINE	L1	L1Md_T	UID-2089	-	chr17	11493545	11500000	0.929	1586	35.007	6.04
LINE	L1	L1Md_T	UID-435	+	chr16	74205832	74212273	0.907	1541	35.003	6.463
LINE	L1	L1Md_T	UID-333	-	chr5	82037107	82043358	0.898	1435	35.002	6.08
LINE	L1	L1Md_T	UID-2129	-	chr6	67576321	67583633	0.914	1288	34.993	6.179
LINE	L1	L1Md_T	UID-1467	+	chr4	88376197	88383177	0.899	2672	34.992	6.321
LINE	L1	L1Md_T	UID-448	+	chr16	87149246	87156042	0.909	1635	34.975	6.123
LINE	L1	L1Md_T	UID-2363	-	chr9	11410626	11417290	0.912	1212	34.959	6.359
LINE	L1	L1Md_T	UID-549	+	chr18	71630931	71637588	0.919	3153	34.955	5.992
LINE	L1	L1Md_T	UID-2410	+	chr7	72927723	72934607	0.879	1943	34.952	6.248
LINE	L1	L1Md_T	UID-861	+	chr15	5266858	5273682	0.89	888	34.95	6.344
LINE	L1	L1Md_T	UID-637	+	chr3	45261424	45268269	0.893	1642	34.903	6.406
LINE	L1	L1Md_T	UID-1471	+	chr4	91654617	91661717	0.888	1364	34.884	6.057
LINE	L1	L1Md_T	UID-2212	+	chr6	43625720	43632160	0.902	1841	34.88	5.962
LINE	L1	L1Md_T	UID-2426	+	chr7	97227322	97233897	0.895	1491	34.843	6.295
LINE	L1	L1Md_T	UID-1639	+	chr2	159656249	159662671	0.91	1180	34.841	6.193
LINE	L1	L1Md_T	UID-685	+	chr3	115915910	115922948	0.866	985	34.829	6.412
LINE	L1	L1Md_T	UID-195	-	chr1	56458631	56464845	0.937	602	34.824	6.031
LINE	L1	L1Md_T	UID-239	+	chr5	28604080	28610842	0.871	2658	34.816	6.162
LINE	L1	L1Md_T	UID-175	-	chr1	97417068	97423534	0.912	927	34.801	6.112
LINE	L1	L1Md_T	UID-258	+	chr5	61778310	61785157	0.93	1479	34.742	6.225
LINE	L1	L1Md_T	UID-2042	+	chr17	60783292	60790332	0.885	1849	34.735	6.237
LINE	L1	L1Md_T	UID-691	+	chr3	120825211	120832694	0.889	1377	34.731	6.463
LINE	L1	L1Md_T	UID-2692	-	chr10	33502858	33509333	0.887	1209	34.662	6.19
LINE	L1	L1Md_T	UID-1236	-	chrX	48755643	48762307	0.875	1270	34.648	6.172
LINE	L1	L1Md_T	UID-518	+	chr18	19862071	19868720	0.873	2299	34.62	6.435
LINE	L1	L1Md_T	UID-332	-	chr5	83108741	83115164	0.93	1421	34.619	6.174
LINE	L1	L1Md_T	UID-1105	+	chr13	79421831	79427988	0.873	1608	34.614	5.958
LINE	L1	L1Md_T	UID-844	-	chr15	33738874	33745758	0.886	1290	34.599	6.138
LINE	L1	L1Md_T	UID-2716	+	chr10	12385876	12392731	0.895	1218	34.588	5.353
LINE	L1	L1Md_T	UID-2717	+	chr10	12385876	12392731	0.895	1218	34.588	5.353
LINE	L1	L1Md_T	UID-32	+	chr1	46583361	46589589	0.917	1457	34.552	6.055
LINE	L1	L1Md_T	UID-1721	-	chr2	39240548	39247018	0.868	853	34.548	5.98
LINE	L1	L1Md_T	UID-2613	-	chr12	49245166	49251850	0.882	834	34.536	6.137
LINE	L1	L1Md_T	UID-2481	-	chr7	55454140	55460563	0.921	1435	34.532	6.639
LINE	L1	L1Md_T	UID-852	-	chr15	26674835	26681908	0.841	1255	34.523	6.063
LINE	L1	L1Md_T	UID-2785	+	chr10	122391376	122398230	0.932	1547	34.513	5.939
LINE	L1	L1Md_T	UID-2007	-	chr14	22829395	22836494	0.913	1435	34.505	6.128
LINE	L1	L1Md_T	UID-162	-	chr1	108321469	108328549	0.887	2696	34.494	6.279
LINE	L1	L1Md_T	UID-440	+	chr16	78988123	78994344	0.902	2111	34.491	6.161
LINE	L1	L1Md_T	UID-1391	+	chrX	146353469	146359487	0.858	1762	34.475	5.814
LINE	L1	L1Md_T	UID-1455	+	chr4	69707630	69713856	0.853	958	34.464	5.885
LINE	L1	L1Md_T	UID-1867	-	chr8	27507945	27514599	0.891	771	34.463	6.191
LINE	L1	L1Md_T	UID-667	+	chr3	75372342	75378772	0.881	1330	34.432	6.04
LINE	L1	L1Md_T	UID-2071	-	chr17	59858506	59864957	0.877	917	34.384	5.372
LINE	L1	L1Md_T	UID-2636	-	chr12	13419471	13425917	0.893	1554	34.378	5.979
LINE	L1	L1Md_T	UID-1215	-	chrX	65668124	65674163	0.917	1208	34.366	6.05
LINE	L1	L1Md_T	UID-1214	-	chrX	69017898	69024597	0.887	1176	34.355	5.863
LINE	L1	L1Md_T	UID-1317	+	chrX	64125981	64132209	0.891	1250	34.325	6.007
LINE	L1	L1Md_T	UID-237	+	chr5	27296140	27302563	0.854	1902	34.276	6.202
LINE	L1	L1Md_T	UID-2476	-	chr7	60156841	60163894	0.903	1904	34.264	6.33
LINE	L1	L1Md_T	UID-383	-	chr5	16749713	16756293	0.903	1335	34.257	6.304
LINE	L1	L1Md_T	UID-91	+	chr1	140923892	140930406	0.877	871	34.241	5.912
LINE	L1	L1Md_T	UID-2666	-	chr10	71585178	71591846	0.886	1371	34.176	5.993
LINE	L1	L1Md_T	UID-164	-	chr1	107202700	107209561	0.882	945	34.159	5.818
LINE	L1	L1Md_T	UID-433	+	chr16	72623663	72630520	0.868	1358	34.107	6.123
LINE	L1	L1Md_T	UID-1603	+	chr2	68770360	68776768	0.91	1031	34.066	6.045
LINE	L1	L1Md_T	UID-2618	-	chr12	43724232	43730672	0.882	927	34.058	5.887
LINE	L1	L1Md_T	UID-1405	+	chrX	158901321	158907541	0.887	1557	34.05	5.953
LINE	L1	L1Md_T	UID-2376	+	chr7	15731035	15738251	0.768	1663	34.042	4.508
LINE	L1	L1Md_T	UID-2648	-	chr10	103747912	103754565	0.889	879	33.988	5.929
[truncated: 687 more rows]
